# Supplementary material for: Myrtinols A–F: New Anti-Inflammatory Peltogynoid Flavonoid Derivatives from the Leaves of Australian Indigenous Plant Backhousia myrtifolia
Source: MDPI journal article supplement (doi:10.3390/molecules28052160), 2023-02-25
Supplement: s1 [file s1]

## Supporting Information

# **Myrtinols A – F: New anti-inflammatory Peltogynoid flavonoid derivatives from the leaves of Australian Indigenous plant *Backhousia myrtifolia***

Shintu Mathew,<sup>†,‡</sup> Kenneth Zhang,<sup>§</sup> Xian Zhou,<sup>†</sup> Gerald Münch<sup>†,‡</sup> Francis Bodkin,<sup>‡</sup> Feng Li,<sup>§</sup> Ritesh Raju,<sup>\*,‡</sup>

<sup>†</sup> NICM Health Research Institute, Western Sydney University, Penrith, NSW, Australia.

<sup>‡</sup> Department of Pharmacology, Western Sydney University, Campbelltown Campus, Sydney, Australia

<sup>§</sup> School of Science, Western Sydney University, Penrith, Sydney, NSW, Australia



## Table of Contents

|                                                                                                            |    |
|------------------------------------------------------------------------------------------------------------|----|
| <b>Figure S1.</b> $^1\text{H}$ NMR spectrum of compound <b>1</b> ( $\text{CD}_3\text{OD}$ , 600 MHz) ..... | 7  |
| <b>Figure S2.</b> COSY spectrum of compound <b>1</b> ( $\text{CD}_3\text{OD}$ , 600 MHz) .....             | 8  |
| <b>Figure S3.</b> HSQC spectrum of compound <b>1</b> ( $\text{CD}_3\text{OD}$ , 600 MHz) .....             | 9  |
| <b>Figure S4.</b> HMBC spectrum of compound <b>1</b> ( $\text{CD}_3\text{OD}$ , 600 MHz) .....             | 10 |
| <b>Figure S5.</b> UV-Vis spectrum for compound <b>1</b> .....                                              | 11 |
| <b>Figure S6.</b> HRMS of compound <b>1</b> .....                                                          | 12 |
| <b>Figure S7.</b> $^1\text{H}$ NMR spectrum of compound <b>2</b> ( $\text{CD}_3\text{OD}$ , 600 MHz) ..... | 13 |
| <b>Figure S8.</b> COSY spectrum of compound <b>2</b> ( $\text{CD}_3\text{OD}$ , 600 MHz) .....             | 14 |
| <b>Figure S9.</b> HSQC spectrum of compound <b>2</b> ( $\text{CD}_3\text{OD}$ , 600 MHz) .....             | 15 |
| <b>Figure S10.</b> HMBC spectrum of compound <b>2</b> ( $\text{CD}_3\text{OD}$ , 600 MHz) .....            | 16 |



|                                                                                                         |    |
|---------------------------------------------------------------------------------------------------------|----|
| <b>Figure S11.</b> NOESY spectrum of compound <b>2</b> (CD <sub>3</sub> OD, 600 MHz) .....              | 17 |
| <b>Figure S12.</b> UV-Vis spectrum for compound <b>2</b> .....                                          | 18 |
| <b>Figure S13.</b> HRMS of compound <b>2</b> .....                                                      | 19 |
| <b>Table S1.</b> Crystallographic data for compound <b>2</b> .....                                      | 20 |
| <b>Figure S14.</b> <sup>1</sup> H NMR spectrum of compound <b>3</b> (CD <sub>3</sub> OD, 600 MHz) ..... | 21 |
| <b>Figure S15.</b> COSY spectrum of compound <b>3</b> (CD <sub>3</sub> OD, 600 MHz) .....               | 22 |
| <b>Figure S16.</b> HSQC spectrum of compound <b>3</b> (CD <sub>3</sub> OD, 600 MHz) .....               | 23 |
| <b>Figure S17.</b> HMBC spectrum of compound <b>3</b> (CD <sub>3</sub> OD, 600 MHz) .....               | 24 |
| <b>Figure S18.</b> NOESY spectrum of compound <b>3</b> (CD <sub>3</sub> OD, 600 MHz) .....              | 25 |
| <b>Figure S19.</b> UV-Vis spectrum for compound <b>3</b> .....                                          | 26 |
| <b>Figure S20.</b> HRMS of compound <b>3</b> .....                                                      | 27 |



|                                                                                                             |    |
|-------------------------------------------------------------------------------------------------------------|----|
| <b>Figure S21.</b> $^1\text{H}$ NMR spectrum of compound <b>4</b> ( $\text{CD}_3\text{OD}$ , 600 MHz) ..... | 28 |
| <b>Figure S22.</b> COSY spectrum of compound <b>4</b> ( $\text{CD}_3\text{OD}$ , 600 MHz) .....             | 29 |
| <b>Figure S23.</b> HSQC spectrum of compound <b>4</b> ( $\text{CD}_3\text{OD}$ , 600 MHz) .....             | 30 |
| <b>Figure S24.</b> HMBC spectrum of compound <b>4</b> ( $\text{CD}_3\text{OD}$ , 600 MHz) .....             | 31 |
| <b>Figure S25.</b> NOESY spectrum of compound <b>4</b> ( $\text{CD}_3\text{OD}$ , 600 MHz) .....            | 32 |
| <b>Figure S26.</b> UV-Vis spectrum for compound <b>4</b> .....                                              | 33 |
| <b>Figure S27.</b> HRMS of compound <b>4</b> .....                                                          | 34 |
| <b>Figure S28.</b> $^1\text{H}$ NMR spectrum of compound <b>5</b> ( $\text{CD}_3\text{OD}$ , 600 MHz) ..... | 35 |
| <b>Figure S29.</b> COSY spectrum of compound <b>5</b> ( $\text{CD}_3\text{OD}$ , 600 MHz) .....             | 36 |
| <b>Figure S30.</b> HSQC spectrum of compound <b>5</b> ( $\text{CD}_3\text{OD}$ , 600 MHz) .....             | 37 |
| <b>Figure S31.</b> HMBC spectrum of compound <b>5</b> ( $\text{CD}_3\text{OD}$ , 600 MHz) .....             | 38 |



|                                                                                                           |    |
|-----------------------------------------------------------------------------------------------------------|----|
| <b>Figure S32.</b> NOESY spectrum of compound <b>2</b> (CD <sub>3</sub> OD, 600 MHz) .....                | 39 |
| <b>Figure S33.</b> UV-Vis spectrum for compound <b>5</b> .....                                            | 40 |
| <b>Figure S34.</b> HRMS of compound <b>5</b> .....                                                        | 41 |
| <b>Figure S35.</b> <sup>1</sup> H NMR spectrum of compound <b>6</b> (CDCl <sub>3</sub> , 600 MHz) .....   | 42 |
| <b>Figure S36.</b> COSY spectrum of compound <b>6</b> (CDCl <sub>3</sub> , 600 MHz) .....                 | 43 |
| <b>Figure S37.</b> HSQC spectrum of compound <b>6</b> (CDCl <sub>3</sub> , 600 MHz) .....                 | 44 |
| <b>Figure S38.</b> HMBC spectrum of compound <b>6</b> (CDCl <sub>3</sub> , 600 MHz) .....                 | 45 |
| <b>Figure S39.</b> UV-Vis spectrum for compound <b>6</b> .....                                            | 46 |
| <b>Figure S40.</b> HRMS of compound <b>6</b> .....                                                        | 47 |
| <b>Figure S41.</b> <sup>1</sup> H NMR spectrum of compound <b>7</b> (DMSO-d <sub>6</sub> , 400 MHz) ..... | 48 |
| <b>Figure S42.</b> HRMS of compound <b>7</b> .....                                                        | 49 |



|                                                                                                                                        |    |
|----------------------------------------------------------------------------------------------------------------------------------------|----|
| <b>Figure S43.</b> $^1\text{H}$ NMR spectrum of compound <b>8</b> ( $\text{CD}_3\text{OD}$ , 600 MHz) .....                            | 50 |
| <b>Figure S44.</b> HRMS of compound <b>8</b> .....                                                                                     | 51 |
| <b>Figure S45.</b> $^1\text{H}$ NMR spectrum of compound <b>9</b> ( $\text{DMSO}-d_6$ , 600 MHz) .....                                 | 52 |
| <b>Figure S46.</b> HRMS of compound <b>9</b> .....                                                                                     | 53 |
| <b>Table S2.</b> NMR data (600 MHz, $\text{CD}_3\text{OD}-d_4$ for compound <b>1</b> .....                                             | 54 |
| <b>Table S3.</b> NMR data (600 MHz, $\text{CD}_3\text{OD}-d_4$ for compound <b>2</b> .....                                             | 55 |
| <b>Table S4.</b> NMR data (600 MHz, $\text{CD}_3\text{OD}-d_4$ for compound <b>3</b> .....                                             | 56 |
| <b>Table S5.</b> NMR data (600 MHz, $\text{CD}_3\text{OD}-d_4$ for compound <b>4</b> .....                                             | 57 |
| <b>Table S6.</b> NMR data (600 MHz, $\text{CD}_3\text{OD}-d_4$ for compound <b>5</b> .....                                             | 58 |
| <b>Table S7.</b> NMR data (600 MHz, $\text{CDCl}_3$ ) for compound <b>6</b> .....                                                      | 59 |
| <b>Table S8.</b> Downregulation of LPS and IFN- $\gamma$ induced nitric oxide production and cell viability of sequential extract..... | 60 |



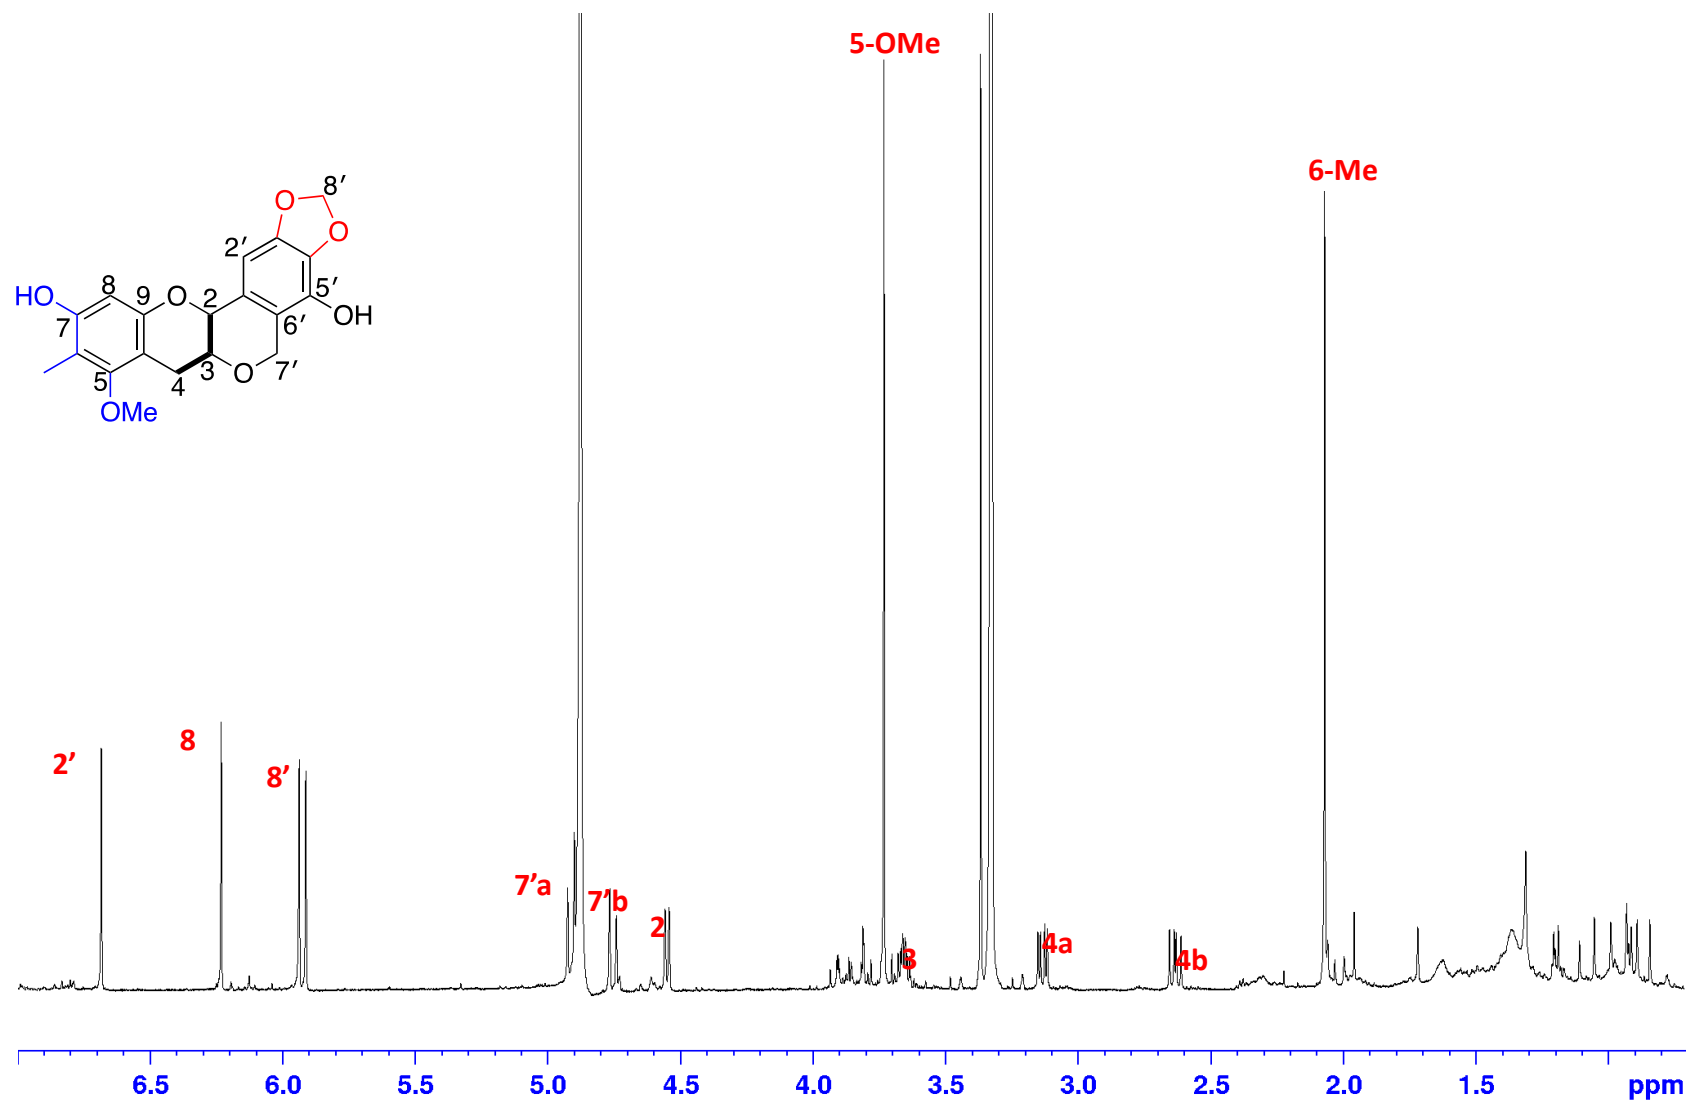

**Figure S1.**  $^1\text{H}$  NMR spectrum of compound **1** ( $\text{CD}_3\text{OD}$ , 600 MHz)



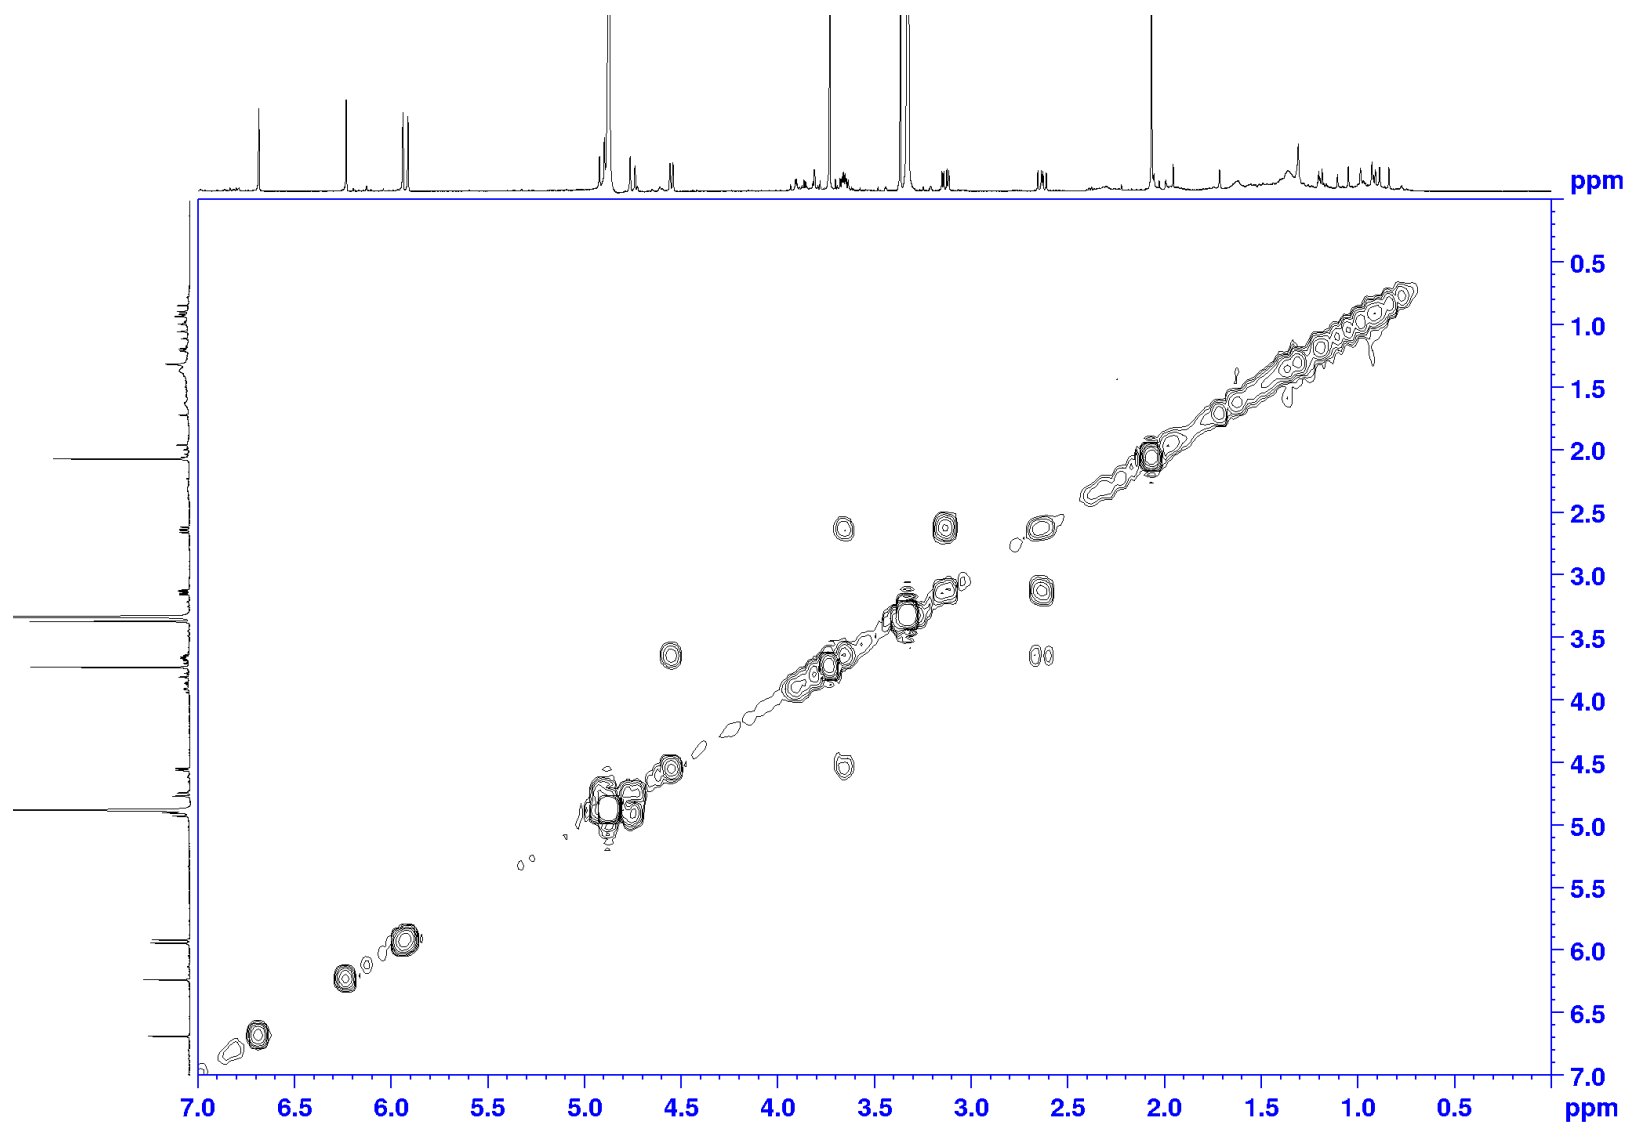

**Figure S2.** COSY spectrum of compound **1** (CD<sub>3</sub>OD, 600 MHz)



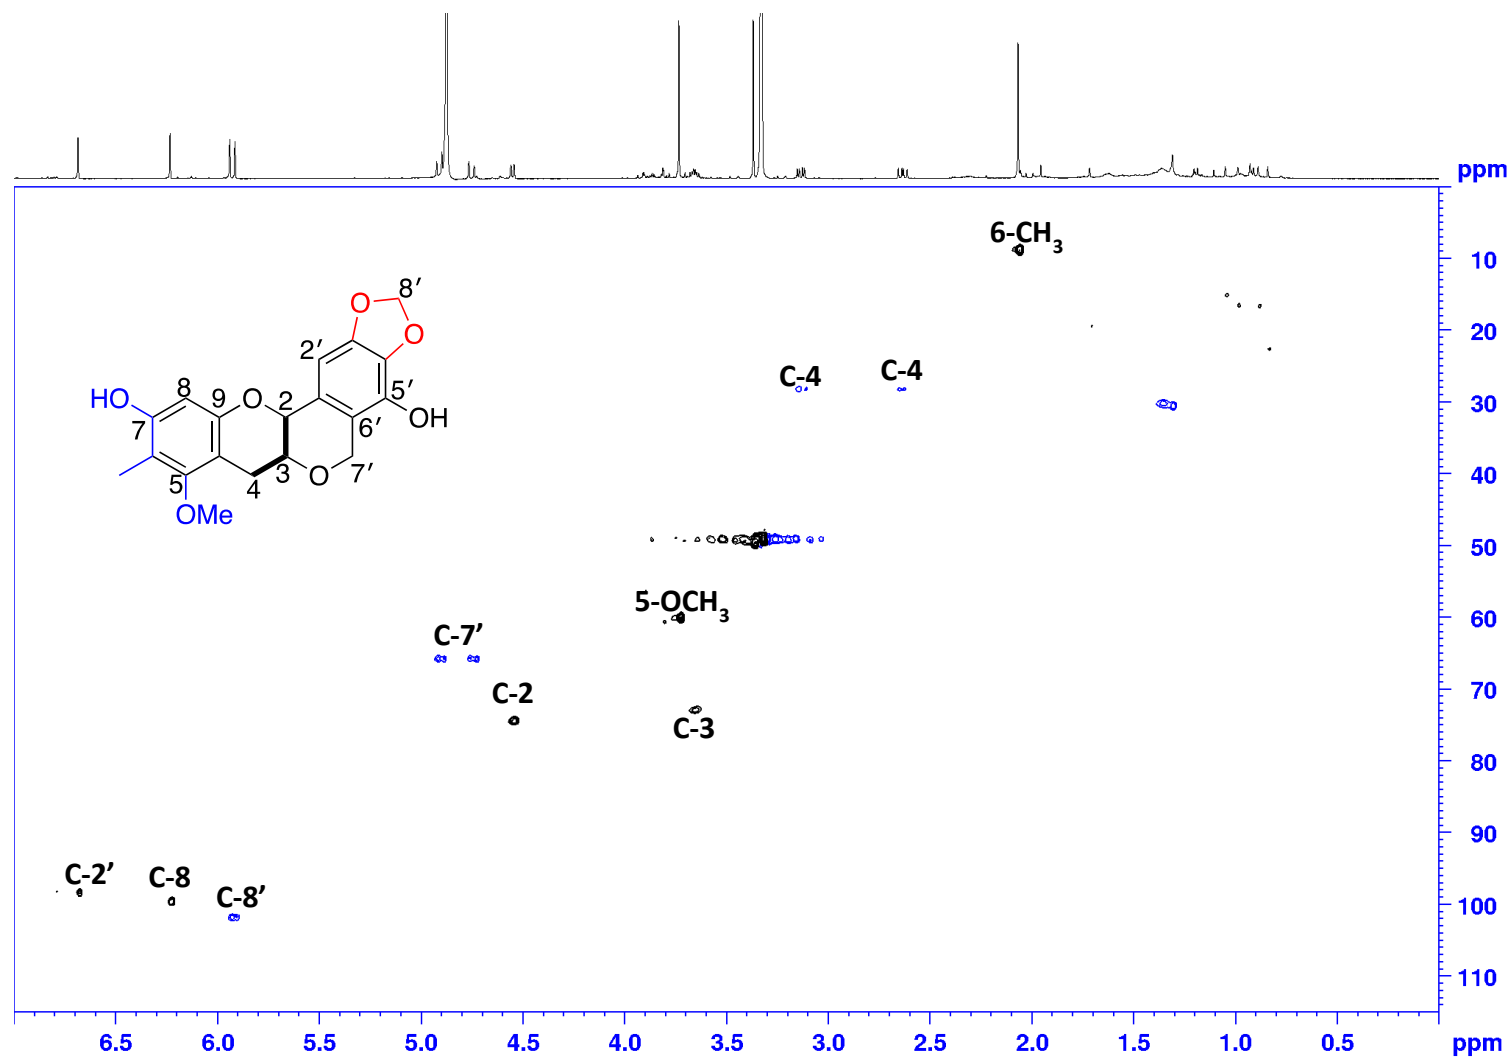

**Figure S3.** HSQC spectrum of compound 1 (CD<sub>3</sub>OD, 600 MHz)



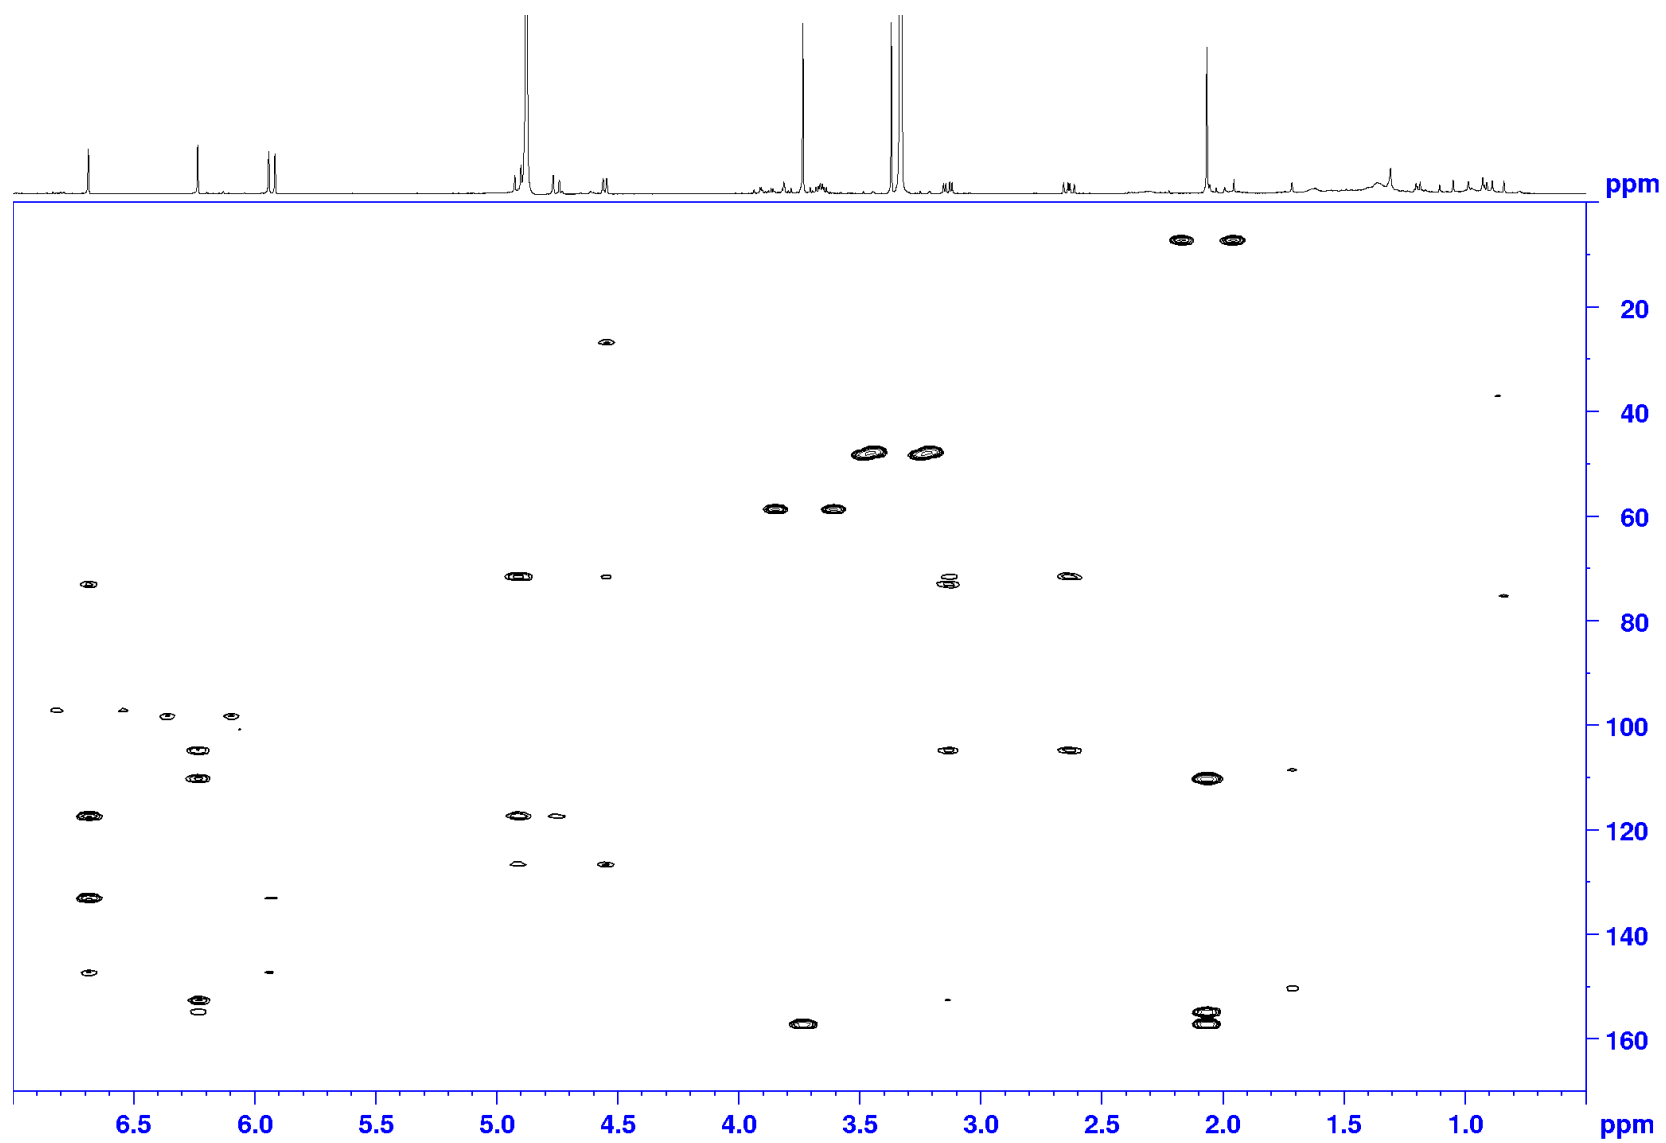

**Figure S4.** HMBC spectrum of compound **1** (CD<sub>3</sub>OD, 600 MHz)



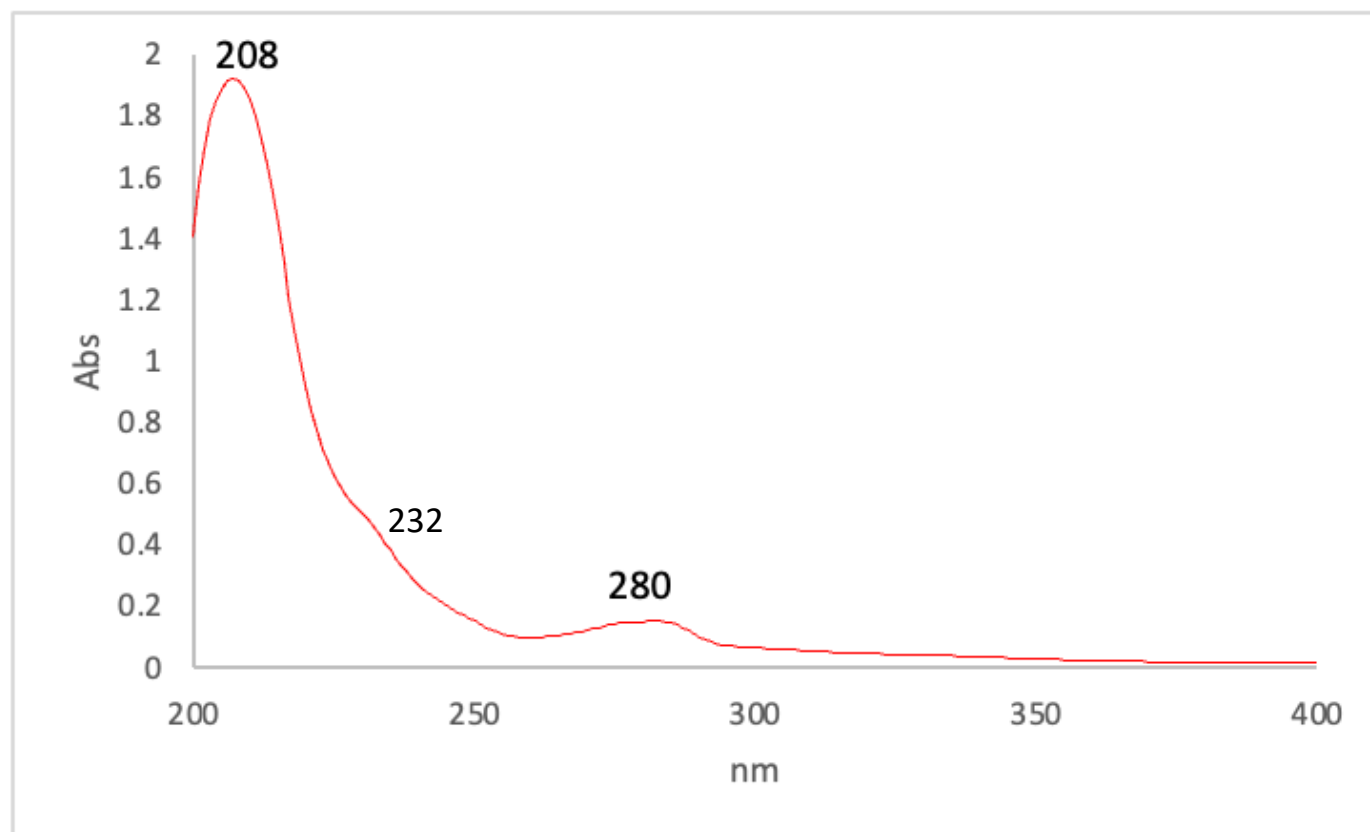

**Figure S5.** UV-Vis spectrum for compound **1**



## Elemental Composition Report

Page 1

### Single Mass Analysis

Tolerance = 5.0 PPM / DBE: min = -1.5, max = 50.0

Element prediction: Off

Number of isotope peaks used for i-FIT = 9

Monoisotopic Mass, Even Electron Ions

17 formula(e) evaluated with 1 results within limits (all results (up to 1000) for each mass)

Elements Used:

C: 0-25 H: 0-30 O: 0-8

011222\_BMF-8 124 (2.430) Cm (124)

1: TOF MS ES-

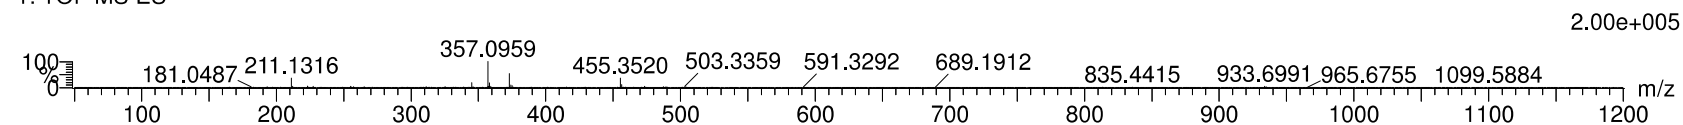

Minimum: -1.5  
Maximum: 20.0 5.0 50.0

| Mass     | Calc. Mass | mDa  | PPM  | DBE  | i-FIT | Norm | Conf (%) | Formula    |
|----------|------------|------|------|------|-------|------|----------|------------|
| 357.0959 | 357.0974   | -1.5 | -4.2 | 11.5 | 961.0 | n/a  | n/a      | C19 H17 O7 |

**Figure S6.** HRMS of compound **1**



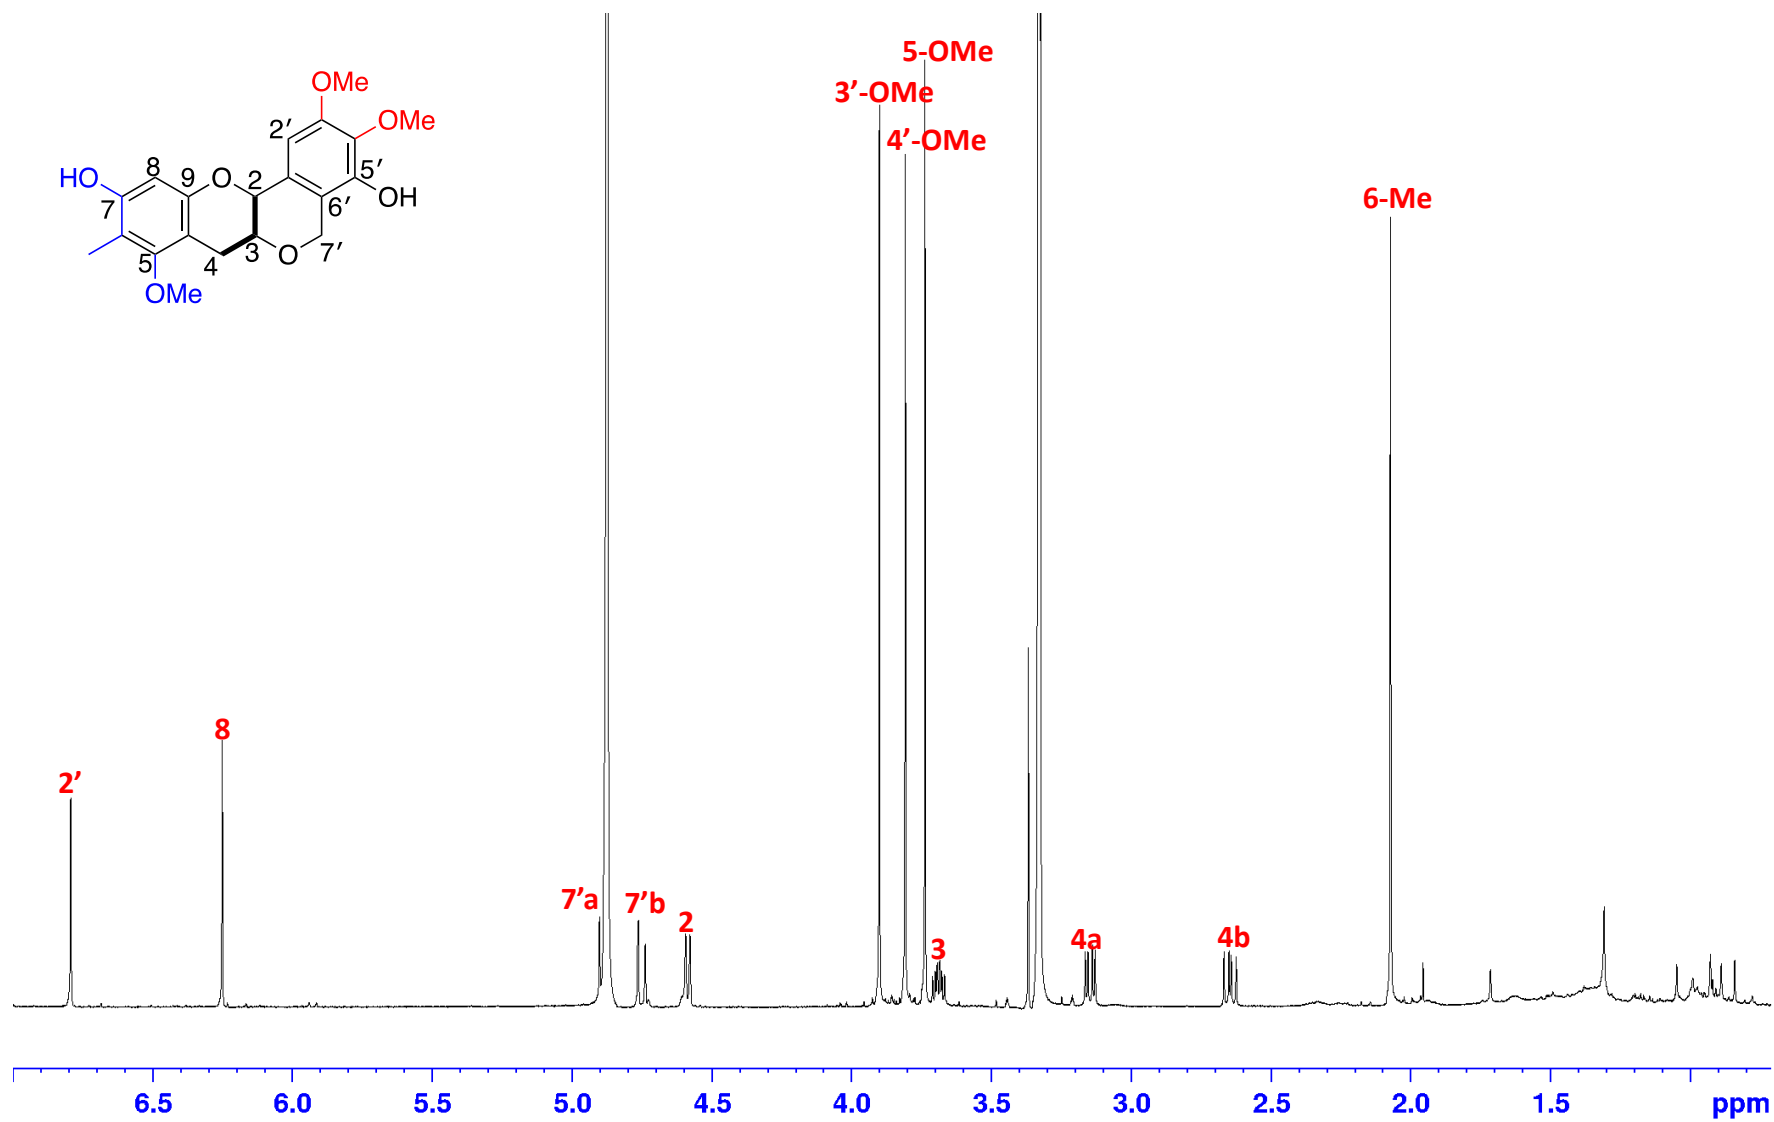

**Figure S7.**  $^1\text{H}$  NMR spectrum of compound **2** ( $\text{CD}_3\text{OD}$ , 600 MHz)



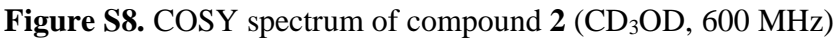



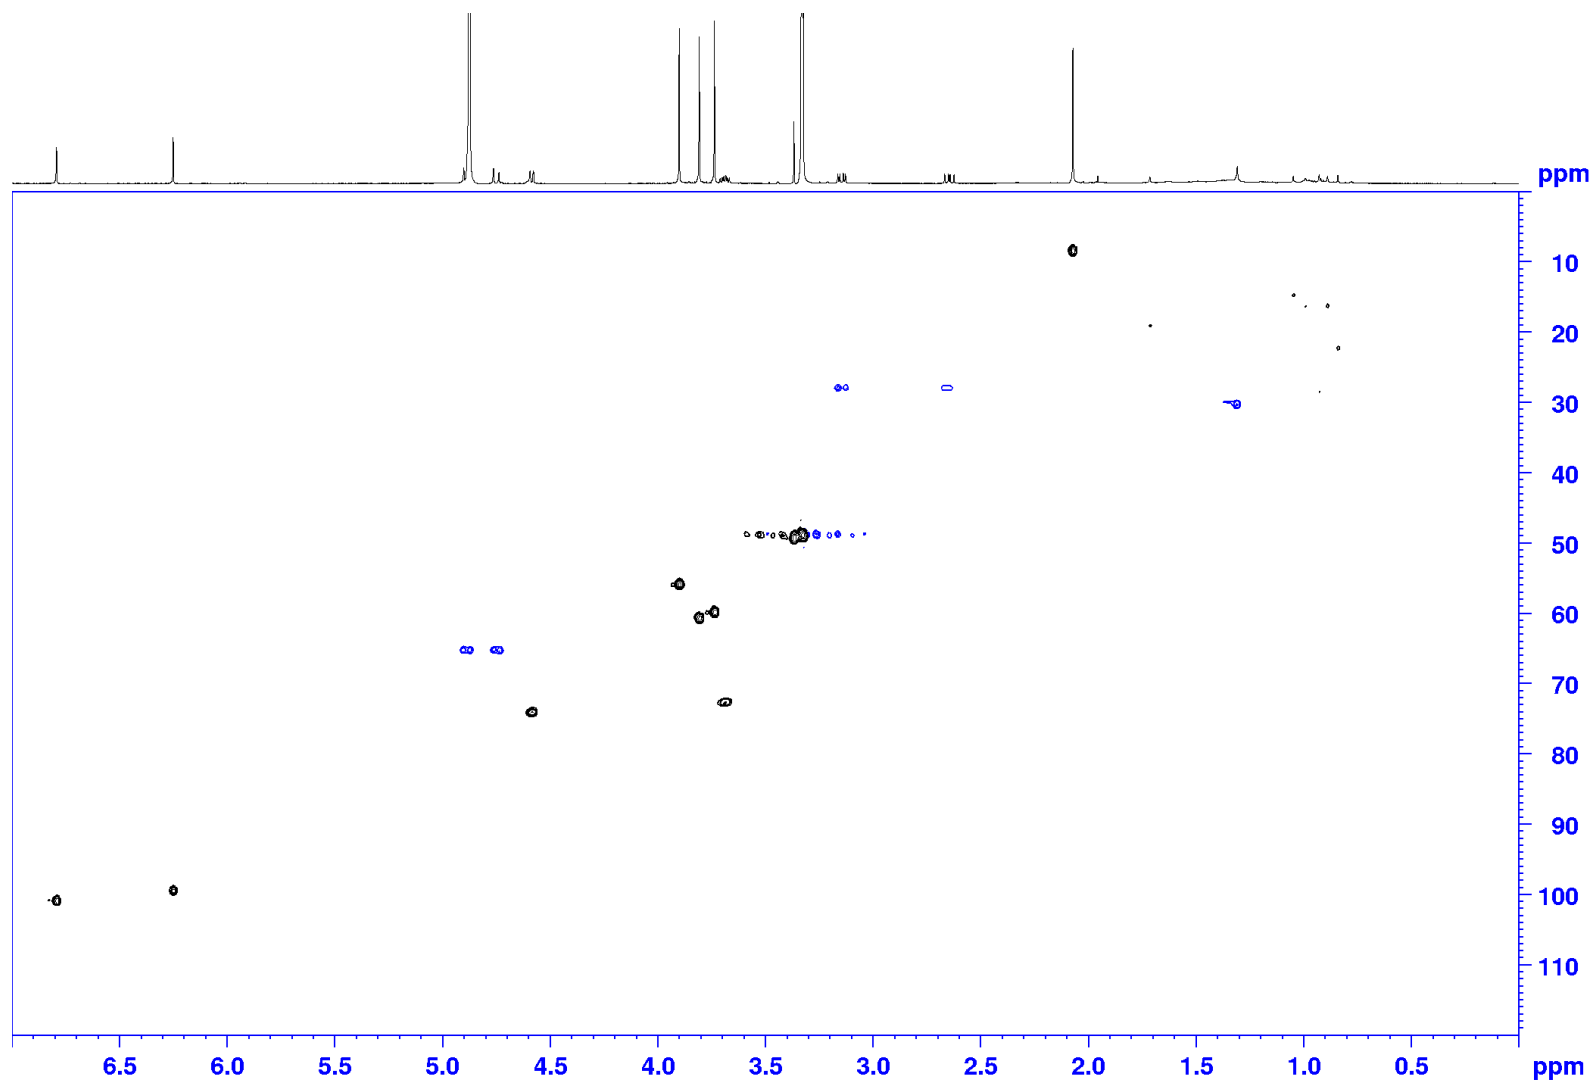

**Figure S9.** HSQC spectrum of compound **2** ( $\text{CD}_3\text{OD}$ , 600 MHz)



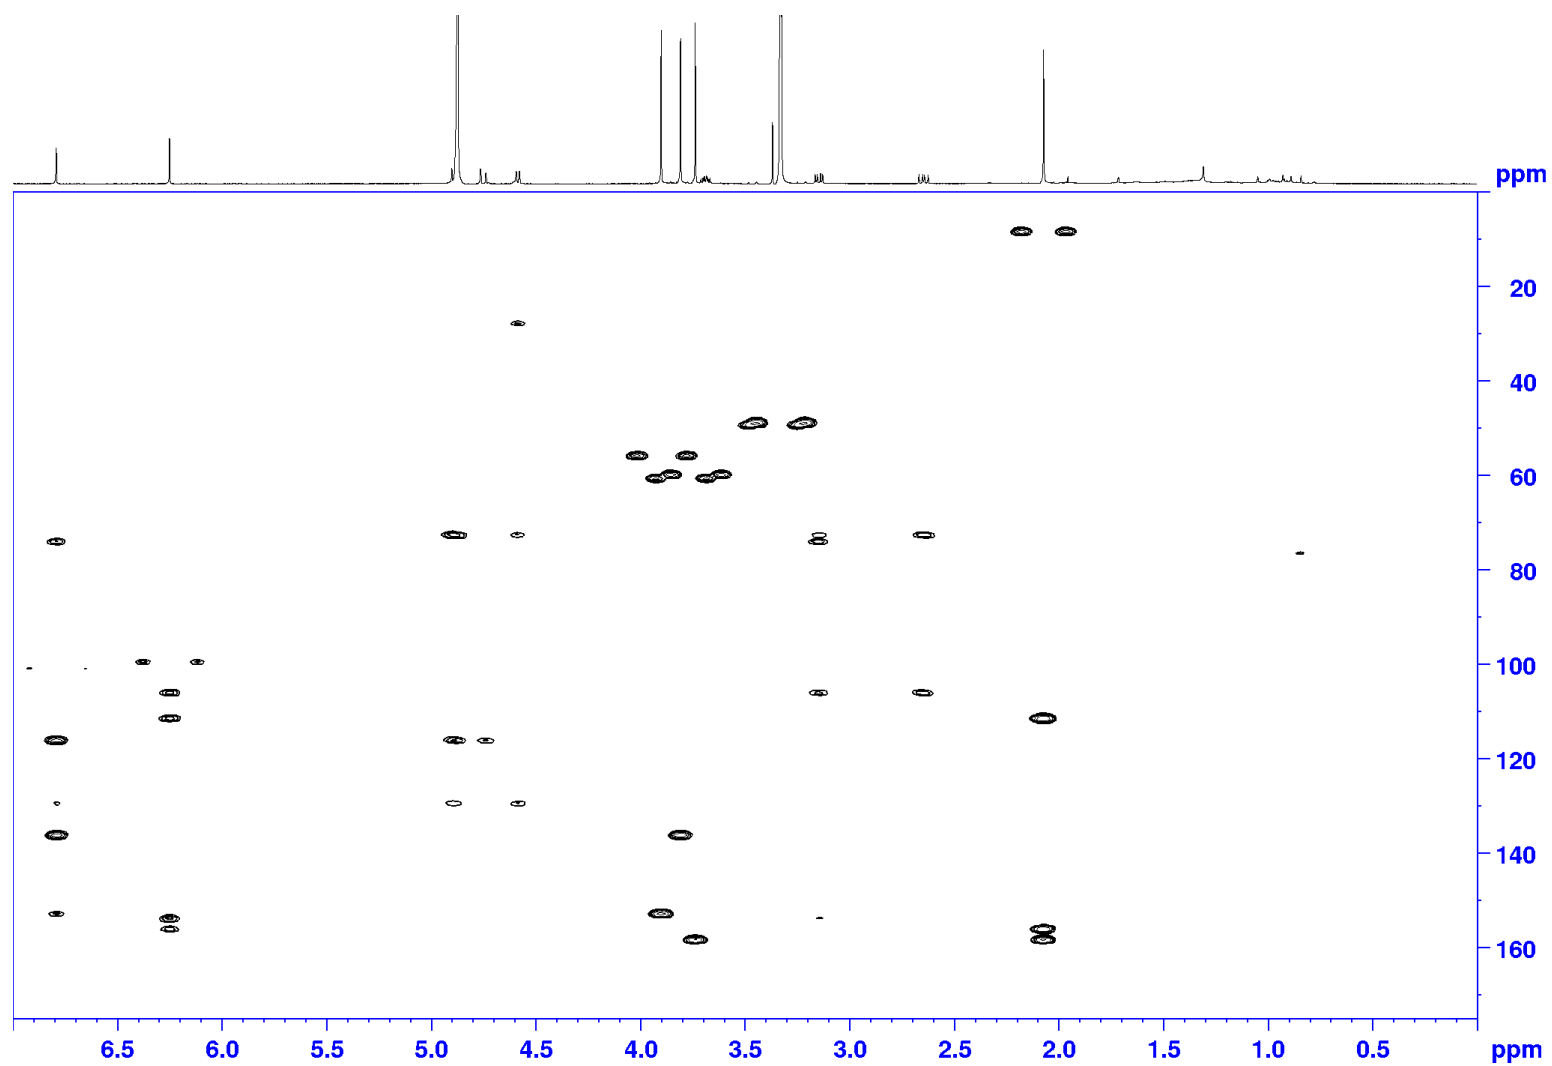

**Figure S10.** HMBC spectrum of compound **2** (CD<sub>3</sub>OD, 600 MHz)



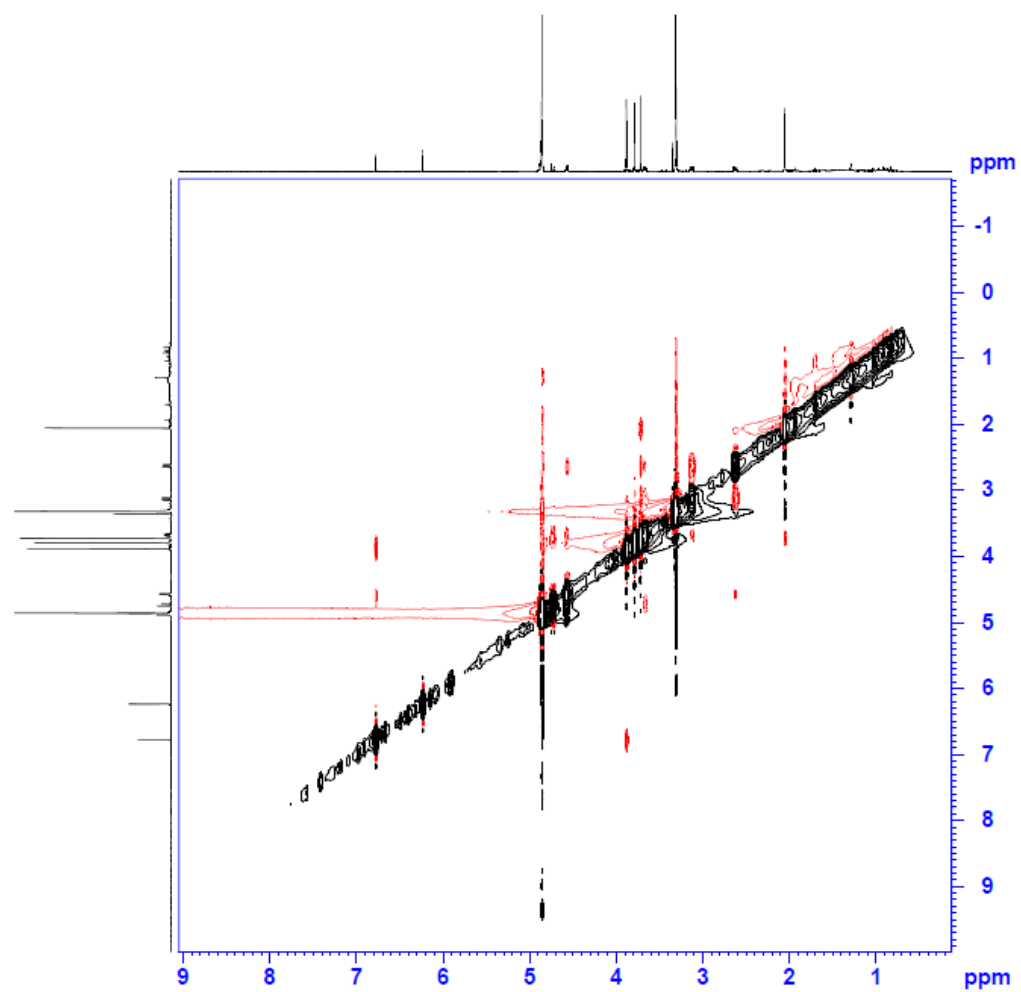

**Figure S11.** NOESY spectrum of compound **2** (CD<sub>3</sub>OD, 600 MHz)



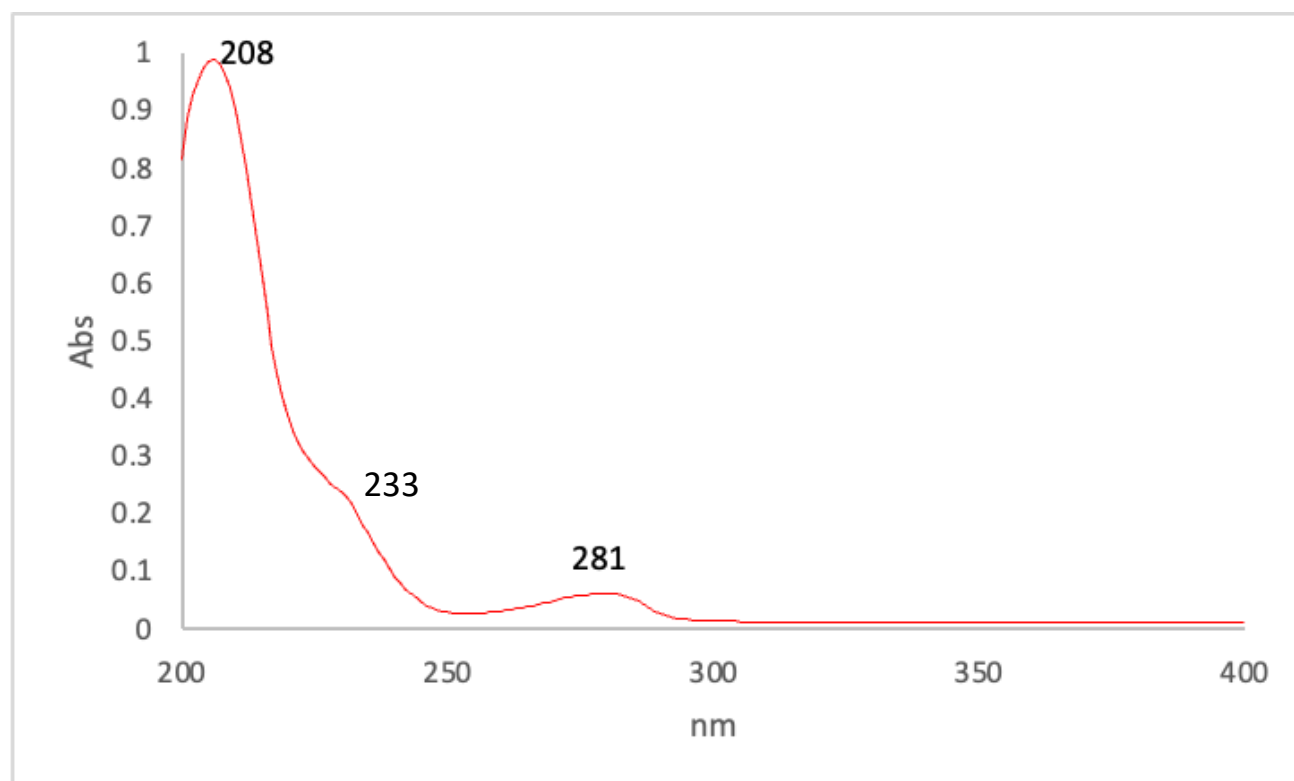

**Figure S12.** UV-Vis spectrum for compound **2**



## Elemental Composition Report

Page 1

### Single Mass Analysis

Tolerance = 10.0 PPM / DBE: min = -1.5, max = 50.0

Element prediction: Off

Number of isotope peaks used for i-FIT = 9

Monoisotopic Mass, Even Electron Ions

16 formula(e) evaluated with 1 results within limits (all results (up to 1000) for each mass)

Elements Used:

C: 0-20 H: 0-26 O: 0-8 Na: 0-1

220829\_BM\_F9 68 (1.345) Cm (67:80)

1: TOF MS ES+

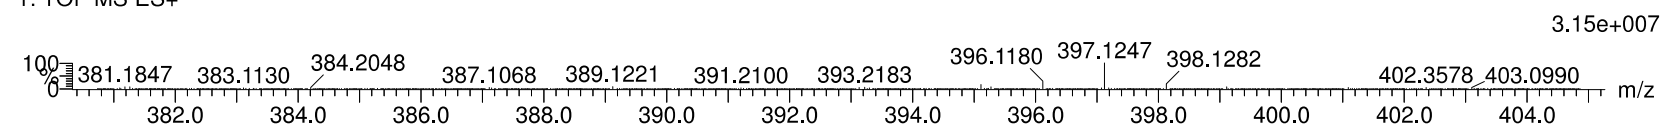

Minimum: -1.5  
Maximum: 20.0 10.0 50.0

| Mass     | Calc. Mass | mDa  | PPM  | DBE | i-FIT  | Norm | Conf (%) | Formula       |
|----------|------------|------|------|-----|--------|------|----------|---------------|
| 397.1247 | 397.1263   | -1.6 | -4.0 | 9.5 | 6422.9 | n/a  | n/a      | C20 H22 O7 Na |

Figure S13. HRMS of compound 2



**Table S1.** Crystallographic data for compound **2**

|                                             |                                                                |
|---------------------------------------------|----------------------------------------------------------------|
| CCDC number                                 | 2236594                                                        |
| Empirical formula                           | C <sub>20</sub> H <sub>21</sub> O <sub>7</sub>                 |
| Formula weight                              | 373.37                                                         |
| Temperature/K                               | 100.0                                                          |
| Crystal system                              | triclinic                                                      |
| Space group                                 | P1                                                             |
| a/Å                                         | 8.7800(18)                                                     |
| b/Å                                         | 8.9200(18)                                                     |
| c/Å                                         | 11.620(2)                                                      |
| $\alpha$ /°                                 | 84.56(3)                                                       |
| $\beta$ /°                                  | 81.25(3)                                                       |
| $\gamma$ /°                                 | 76.39(3)                                                       |
| Volume/Å <sup>3</sup>                       | 872.6(3)                                                       |
| Z                                           | 2                                                              |
| $\rho_{\text{calc}}$ /cm <sup>3</sup>       | 1.421                                                          |
| $\mu$ /mm <sup>-1</sup>                     | 0.108                                                          |
| F(000)                                      | 394.0                                                          |
| Crystal size/mm <sup>3</sup>                | 0.2 × 0.1 × 0.1                                                |
| Radiation                                   | MoK $\alpha$ ( $\lambda$ = 0.71073)                            |
| 2 $\Theta$ range for data collection/°      | 3.552 to 57.202                                                |
| Index ranges                                | -11 ≤ h ≤ 11, -11 ≤ k ≤ 11, -15 ≤ l ≤ 15                       |
| Reflections collected                       | 20884                                                          |
| Independent reflections                     | 6838 [ $R_{\text{int}}$ = 0.0191, $R_{\text{sigma}}$ = 0.0186] |
| Data/restraints/parameters                  | 6838/3/499                                                     |
| Goodness-of-fit on F <sup>2</sup>           | 1.048                                                          |
| Final R indexes [ $I \geq 2\sigma(I)$ ]     | $R_1$ = 0.0383, $wR_2$ = 0.1031                                |
| Final R indexes [all data]                  | $R_1$ = 0.0387, $wR_2$ = 0.1045                                |
| Largest diff. peak/hole / e Å <sup>-3</sup> | 0.36/-0.56                                                     |
| Flack parameter                             | 0.06(13)                                                       |



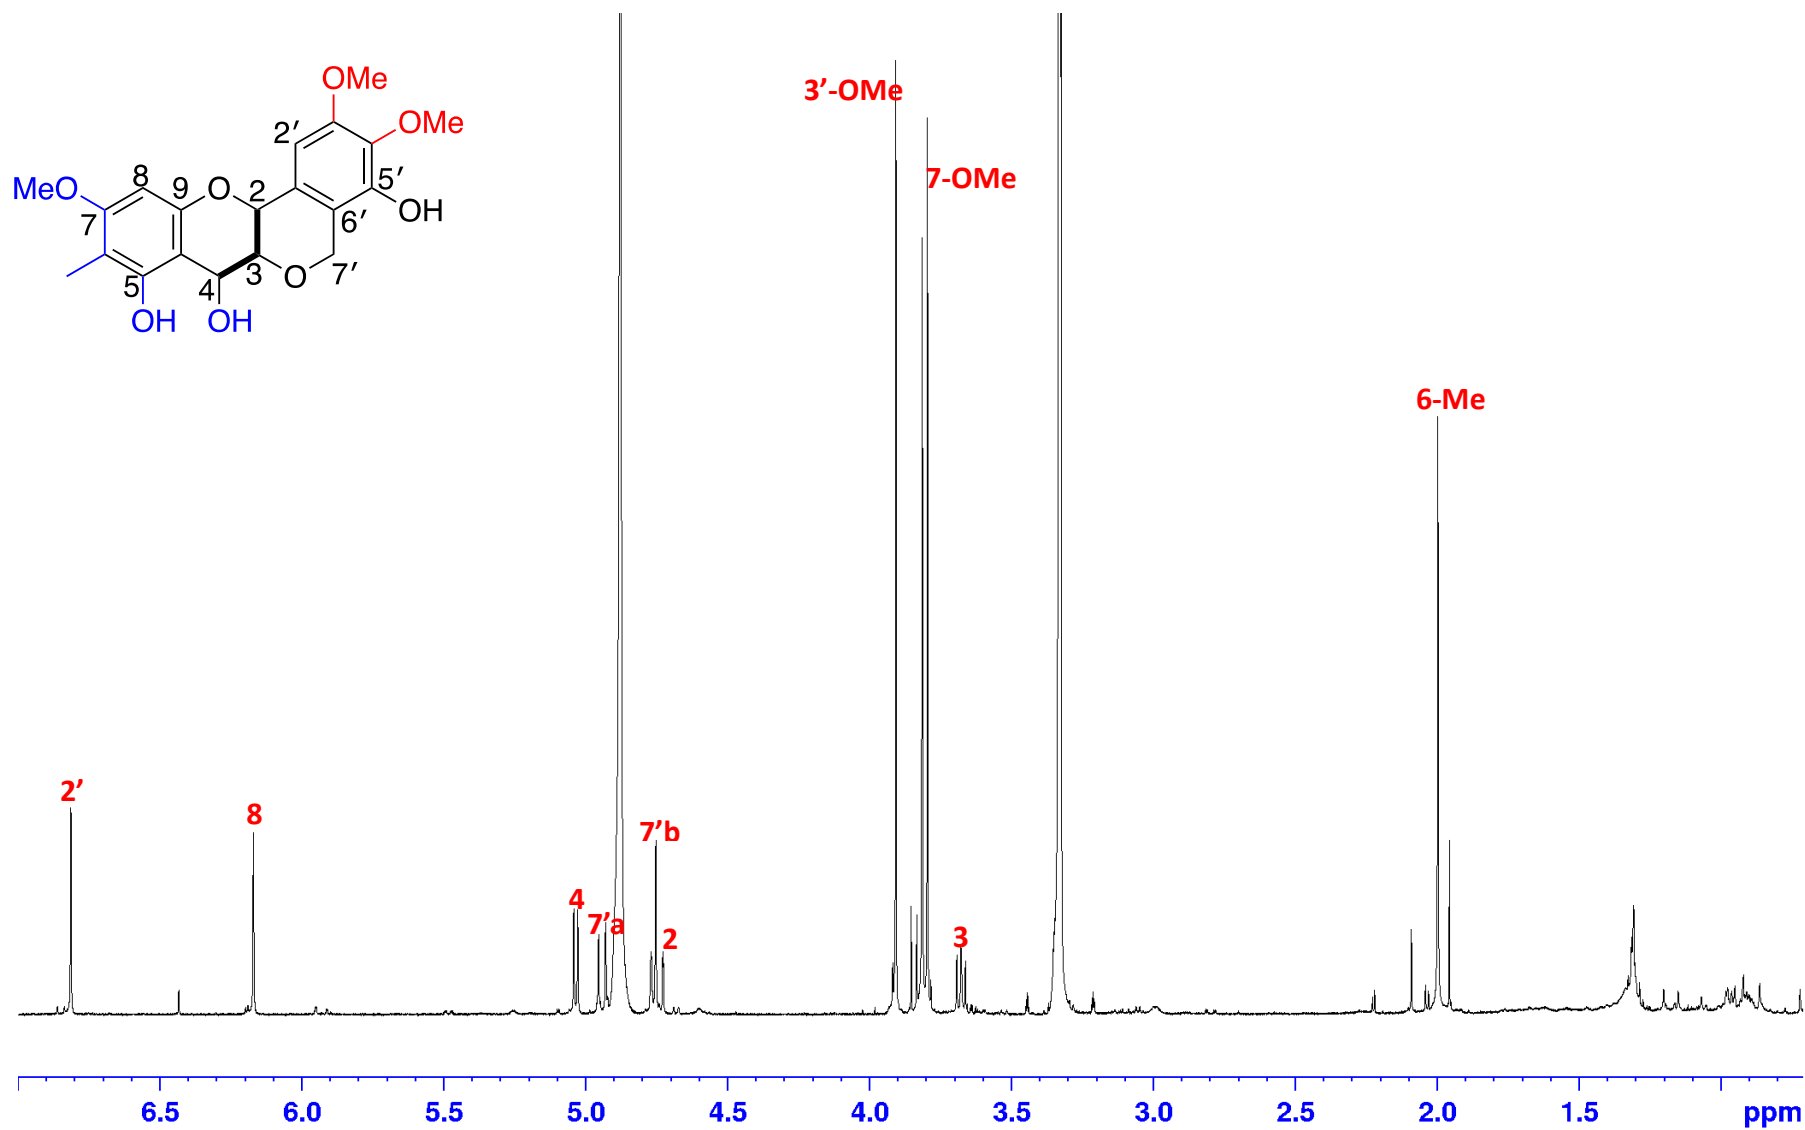

**Figure S14.**  $^1\text{H}$  NMR spectrum of compound **3** ( $\text{CD}_3\text{OD}$ , 600 MHz)



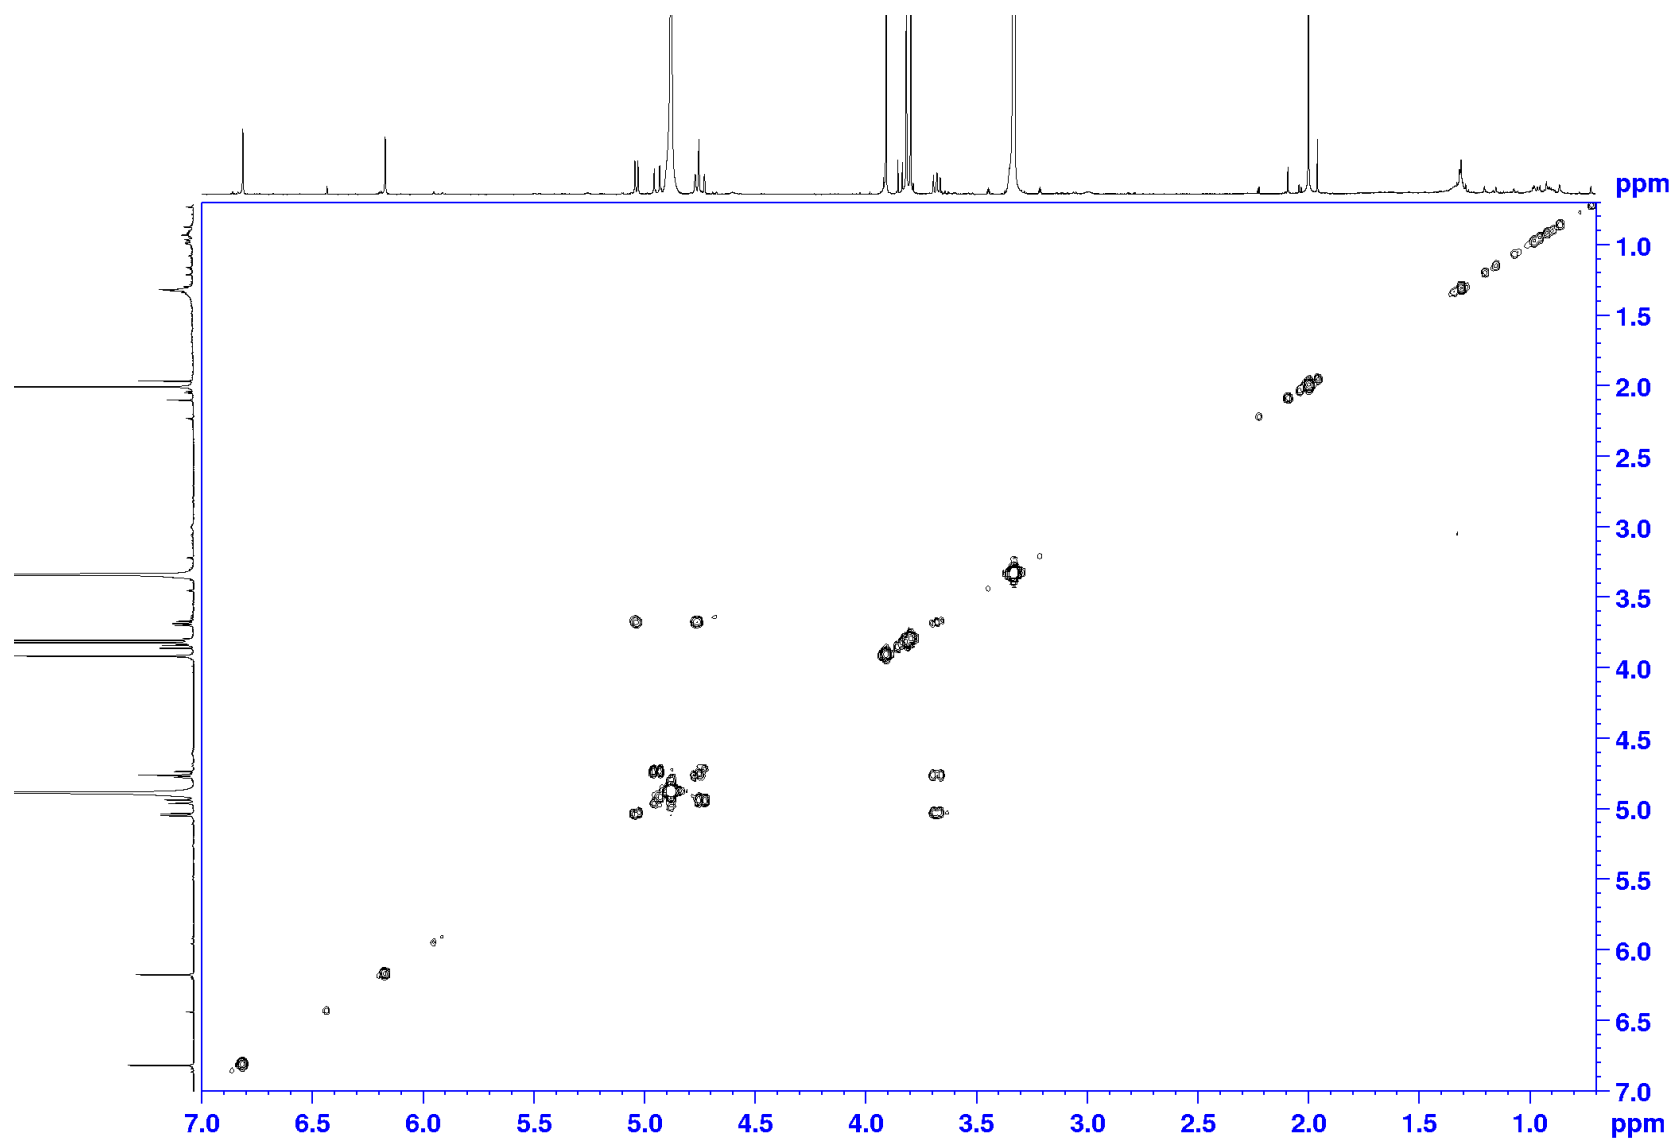

**Figure S15.** COSY spectrum of compound **3** (CD<sub>3</sub>OD, 600 MHz)



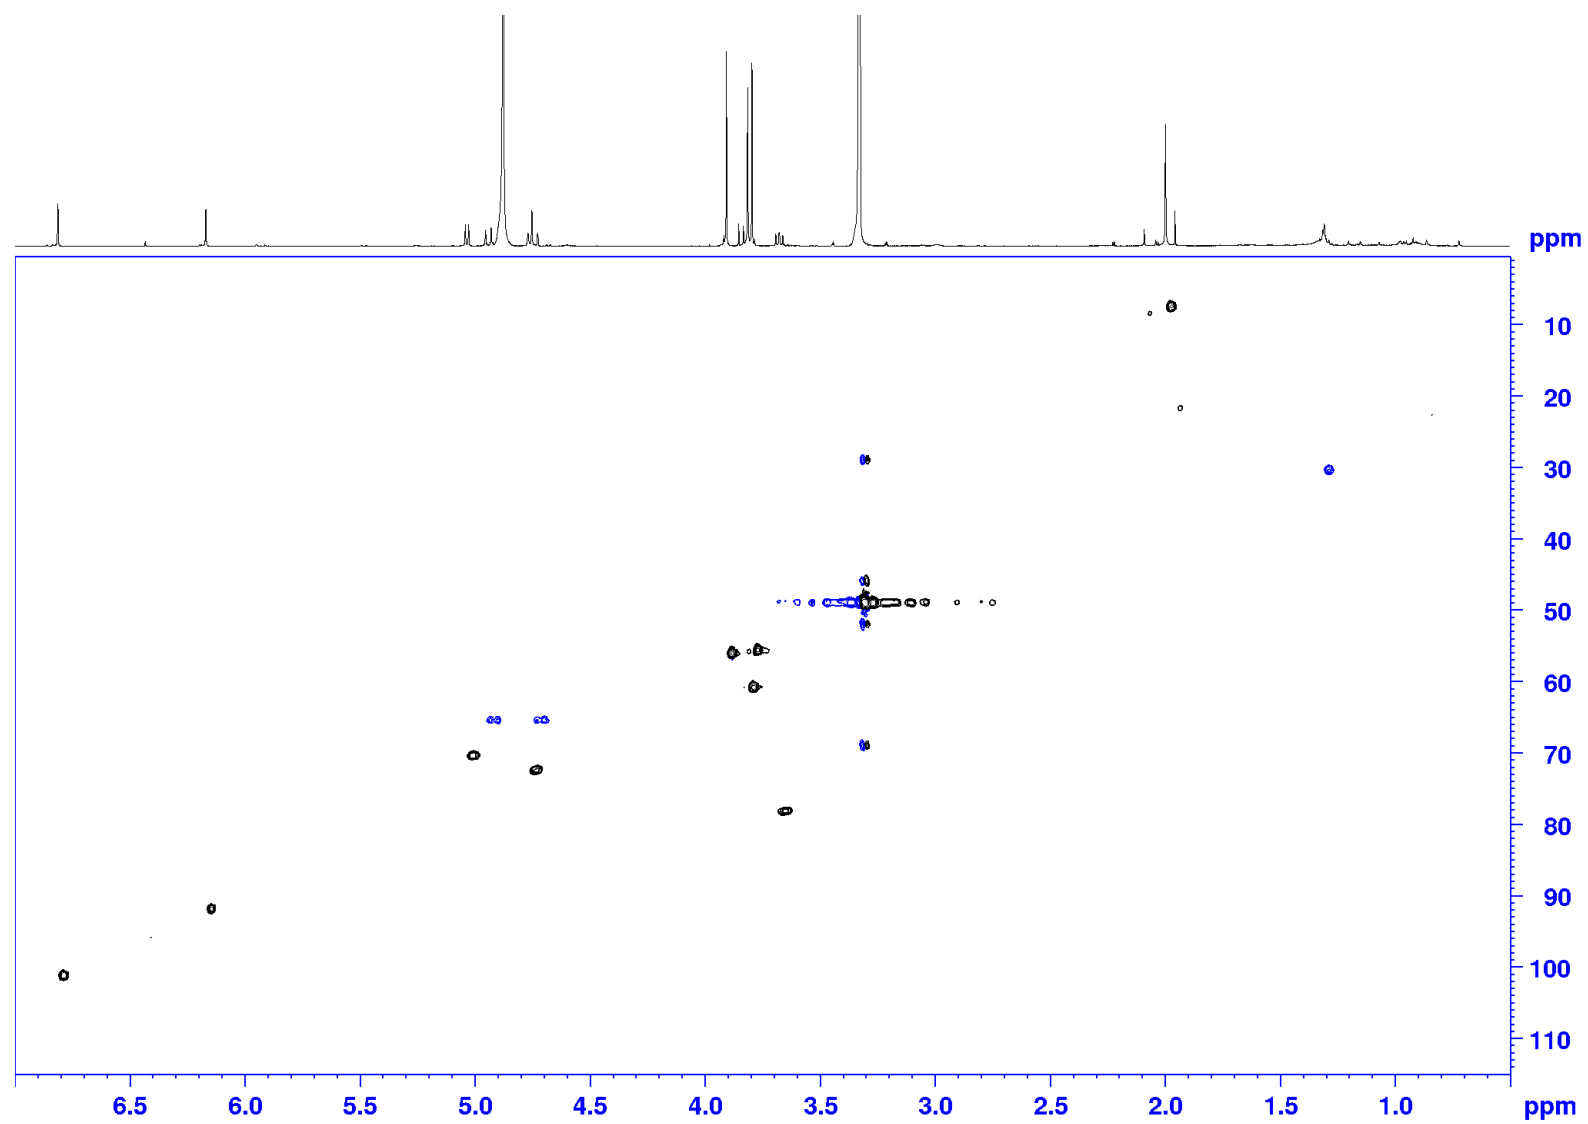

**Figure S16.** HSQC spectrum of compound **3** (CD<sub>3</sub>OD, 600 MHz)



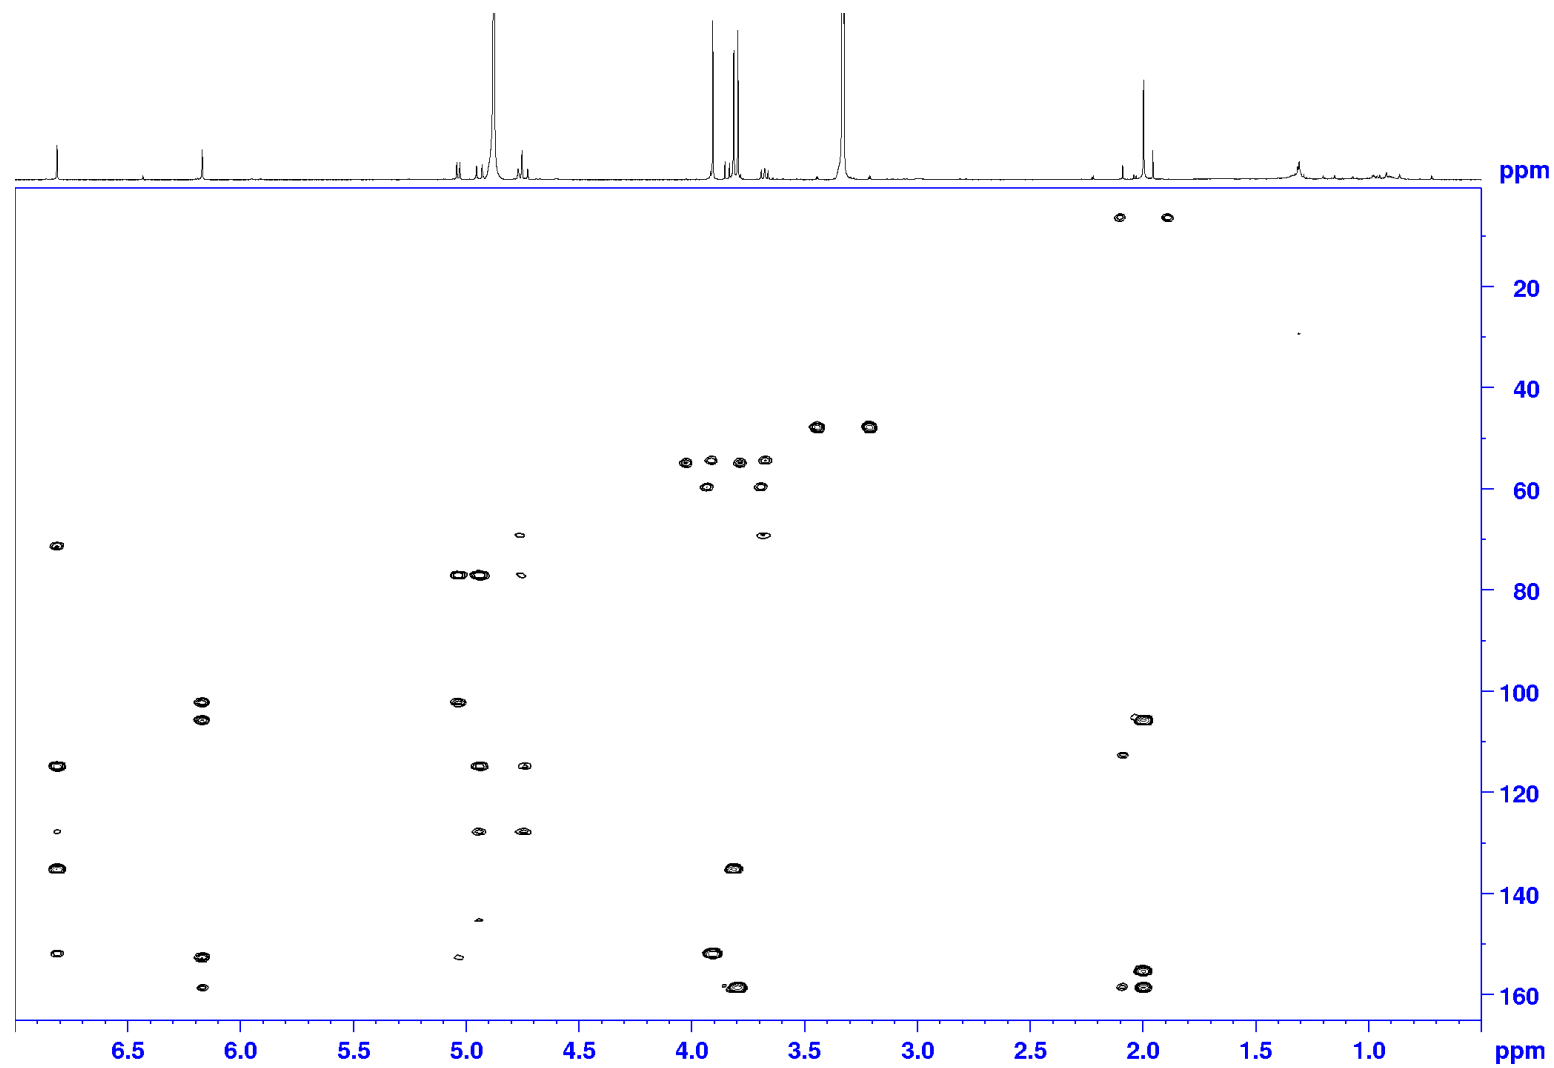

**Figure S17.** HMBC spectrum of compound **3** (CD<sub>3</sub>OD, 600 MHz)



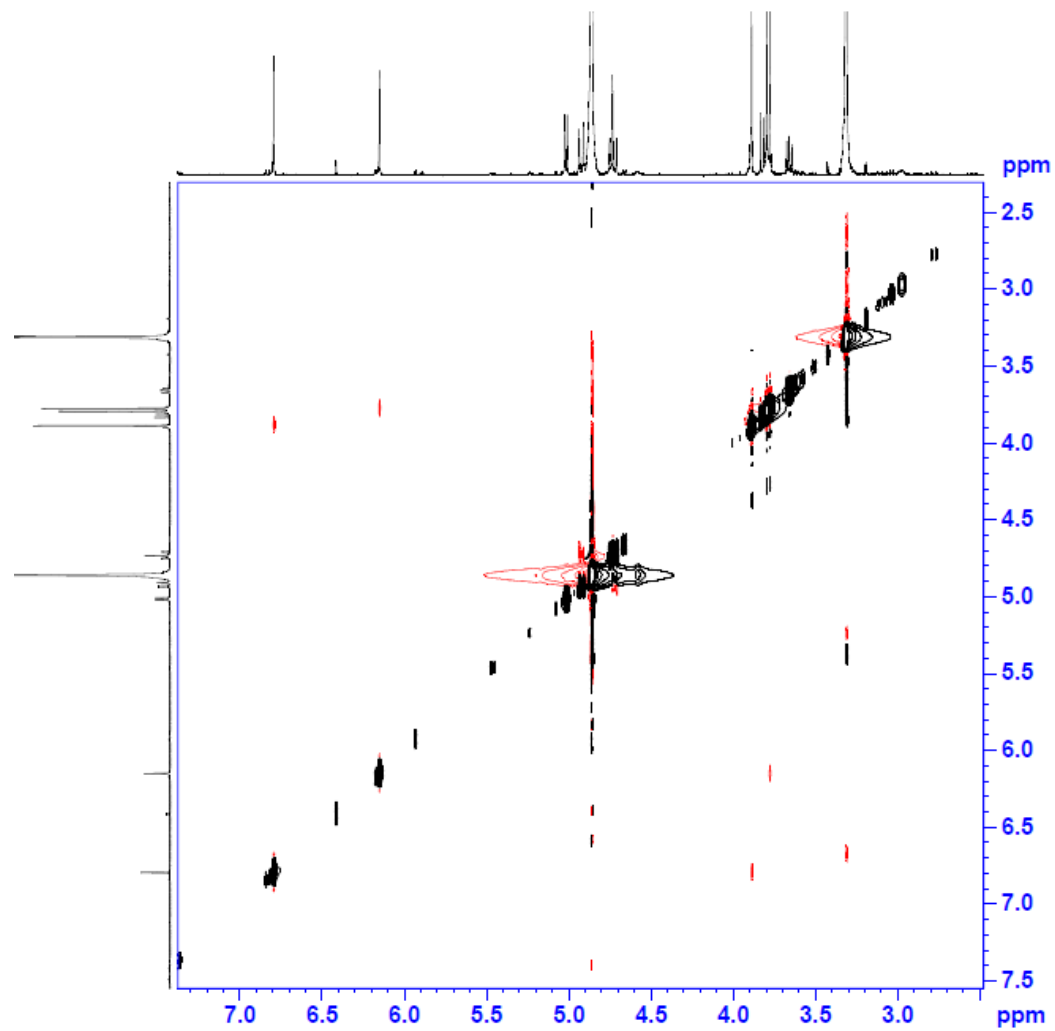

**Figure S18.** NOESY spectrum of compound **3** (CD<sub>3</sub>OD, 600 MHz)



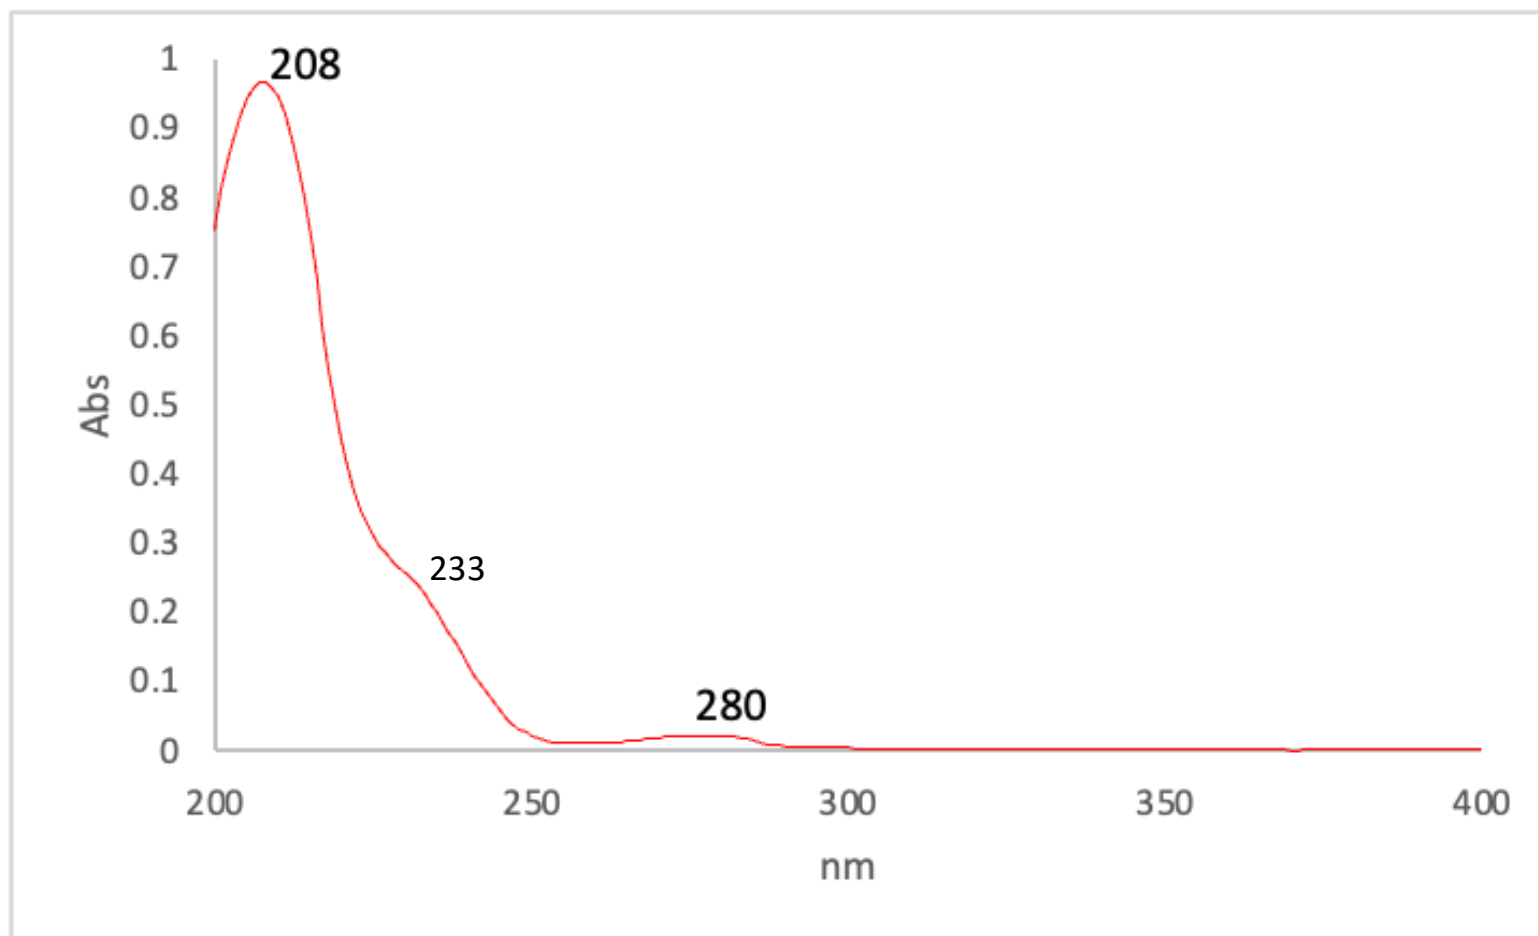

**Figure S19.** UV-Vis spectrum for compound **3**



## Elemental Composition Report

Page 1

### Single Mass Analysis

Tolerance = 5.0 PPM / DBE: min = -1.5, max = 50.0

Element prediction: Off

Number of isotope peaks used for i-FIT = 9

Monoisotopic Mass, Even Electron Ions

13 formula(e) evaluated with 1 results within limits (all results (up to 1000) for each mass)

Elements Used:

C: 0-25 H: 0-30 O: 0-8

011222\_BMF-11A 123 (2.413) Cm (123)

1: TOF MS ES-

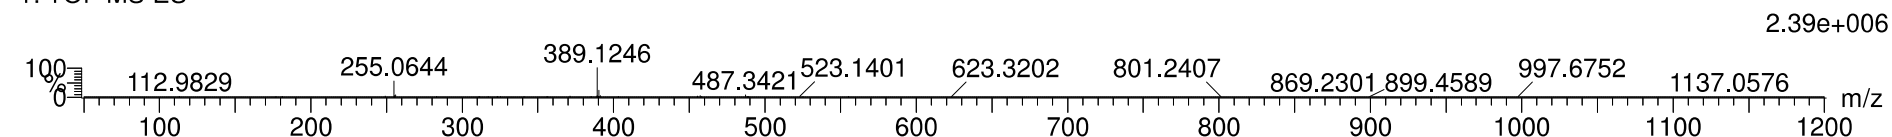

Minimum: -1.5  
Maximum: 20.0 5.0 50.0

| Mass     | Calc. Mass | mDa | PPM | DBE  | i-FIT  | Norm | Conf (%) | Formula    |
|----------|------------|-----|-----|------|--------|------|----------|------------|
| 389.1246 | 389.1236   | 1.0 | 2.6 | 10.5 | 2068.4 | n/a  | n/a      | C20 H21 O8 |

Figure S20. HRMS spectrum for compound 3



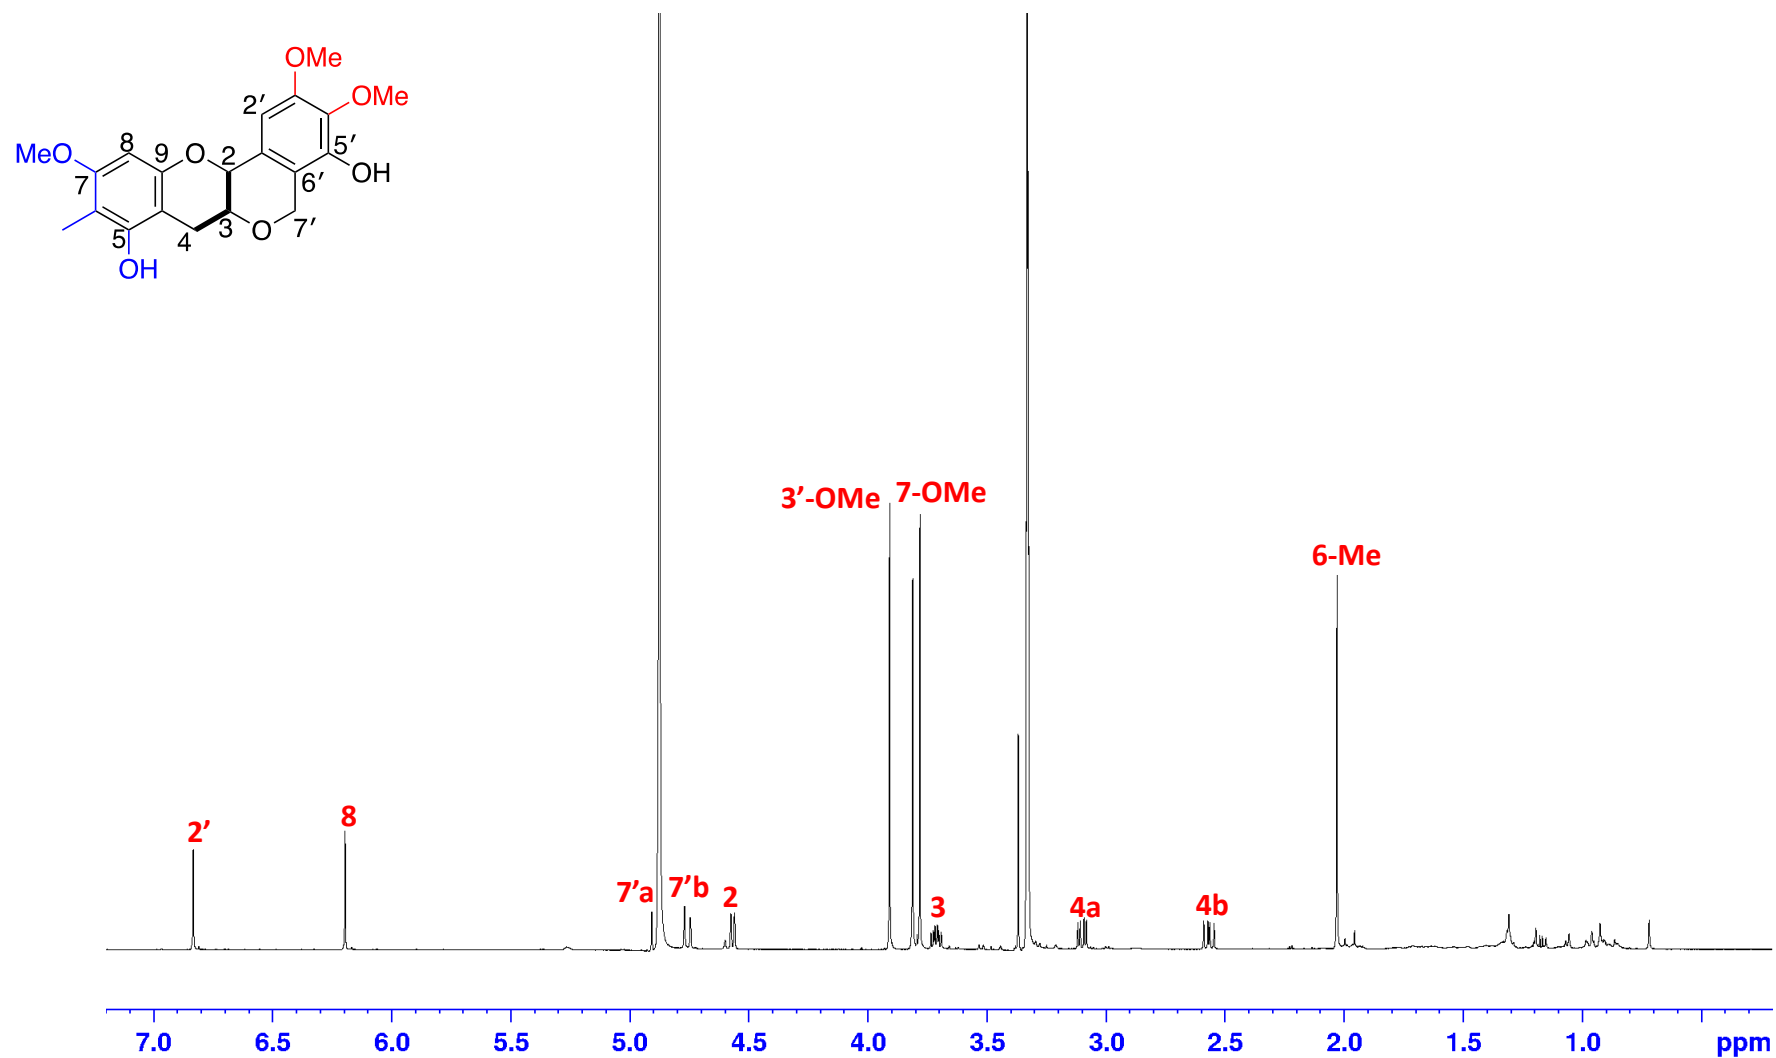

**Figure S21.**  $^1\text{H}$  NMR spectrum of compound **4** ( $\text{CD}_3\text{OD}$ , 600 MHz)



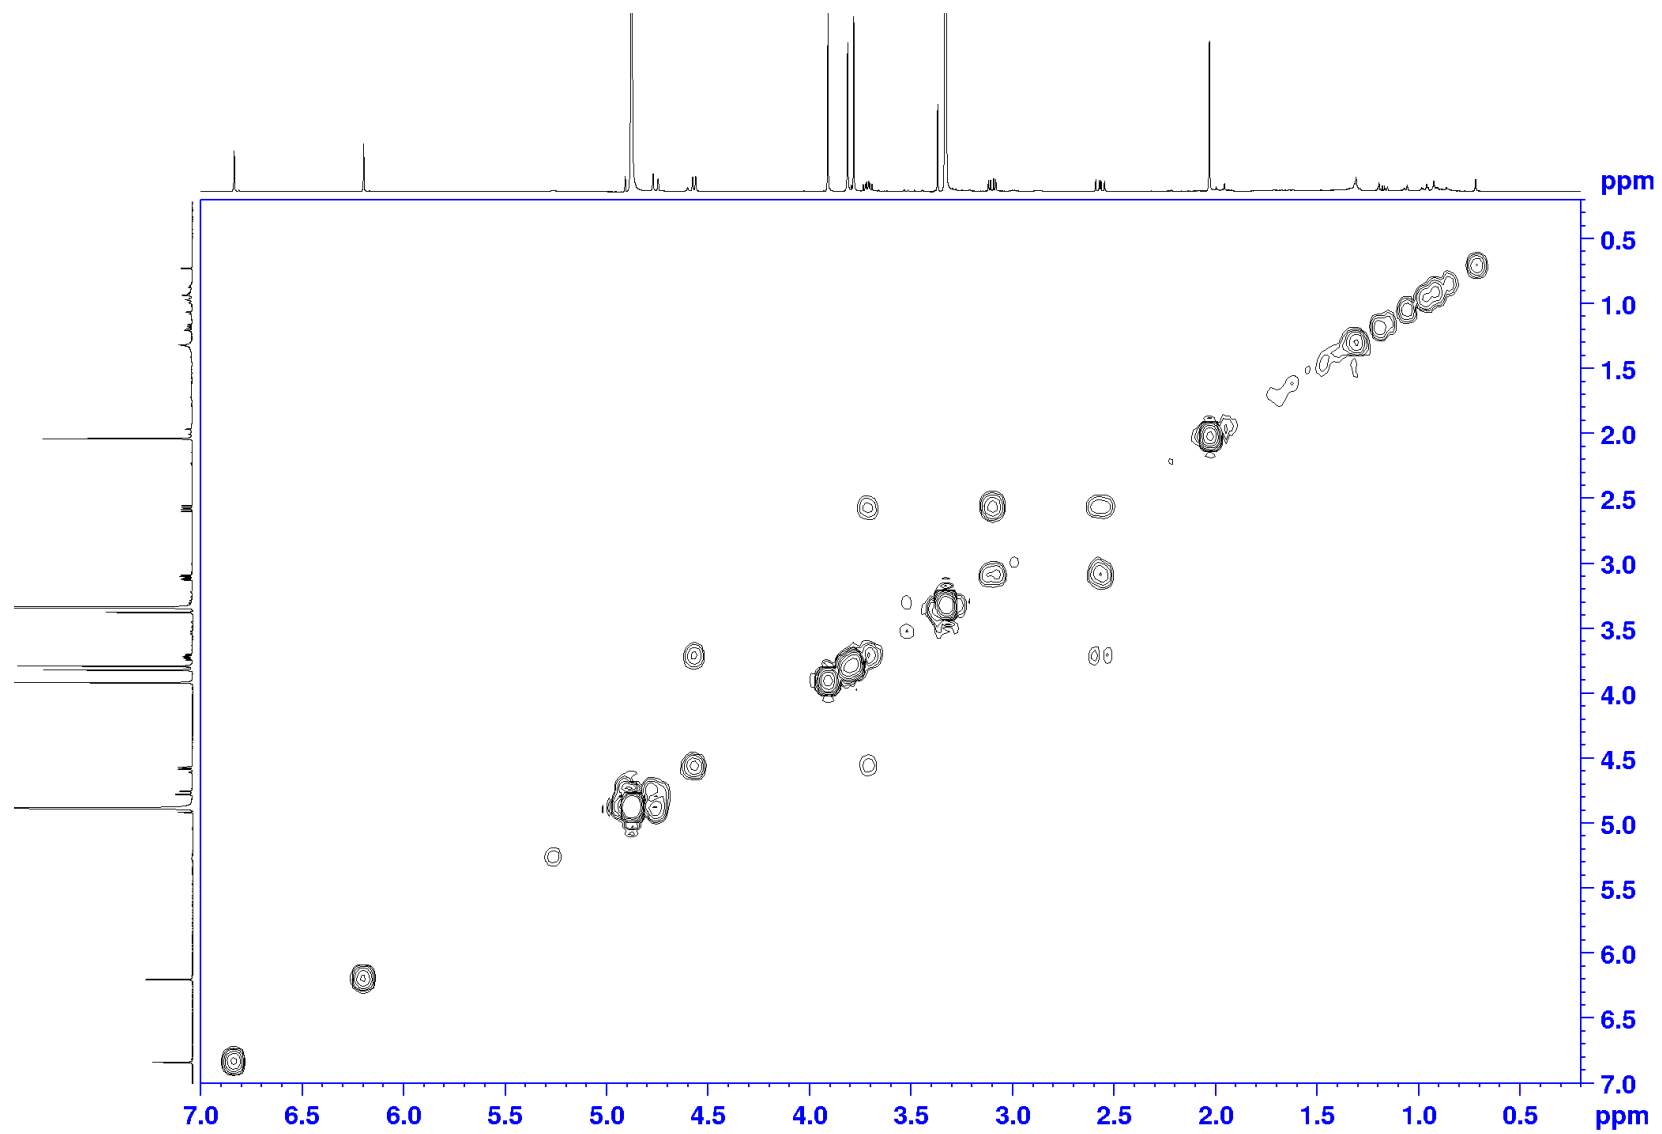

**Figure S22.** COSY spectrum of compound **4** (CD<sub>3</sub>OD, 600 MHz)



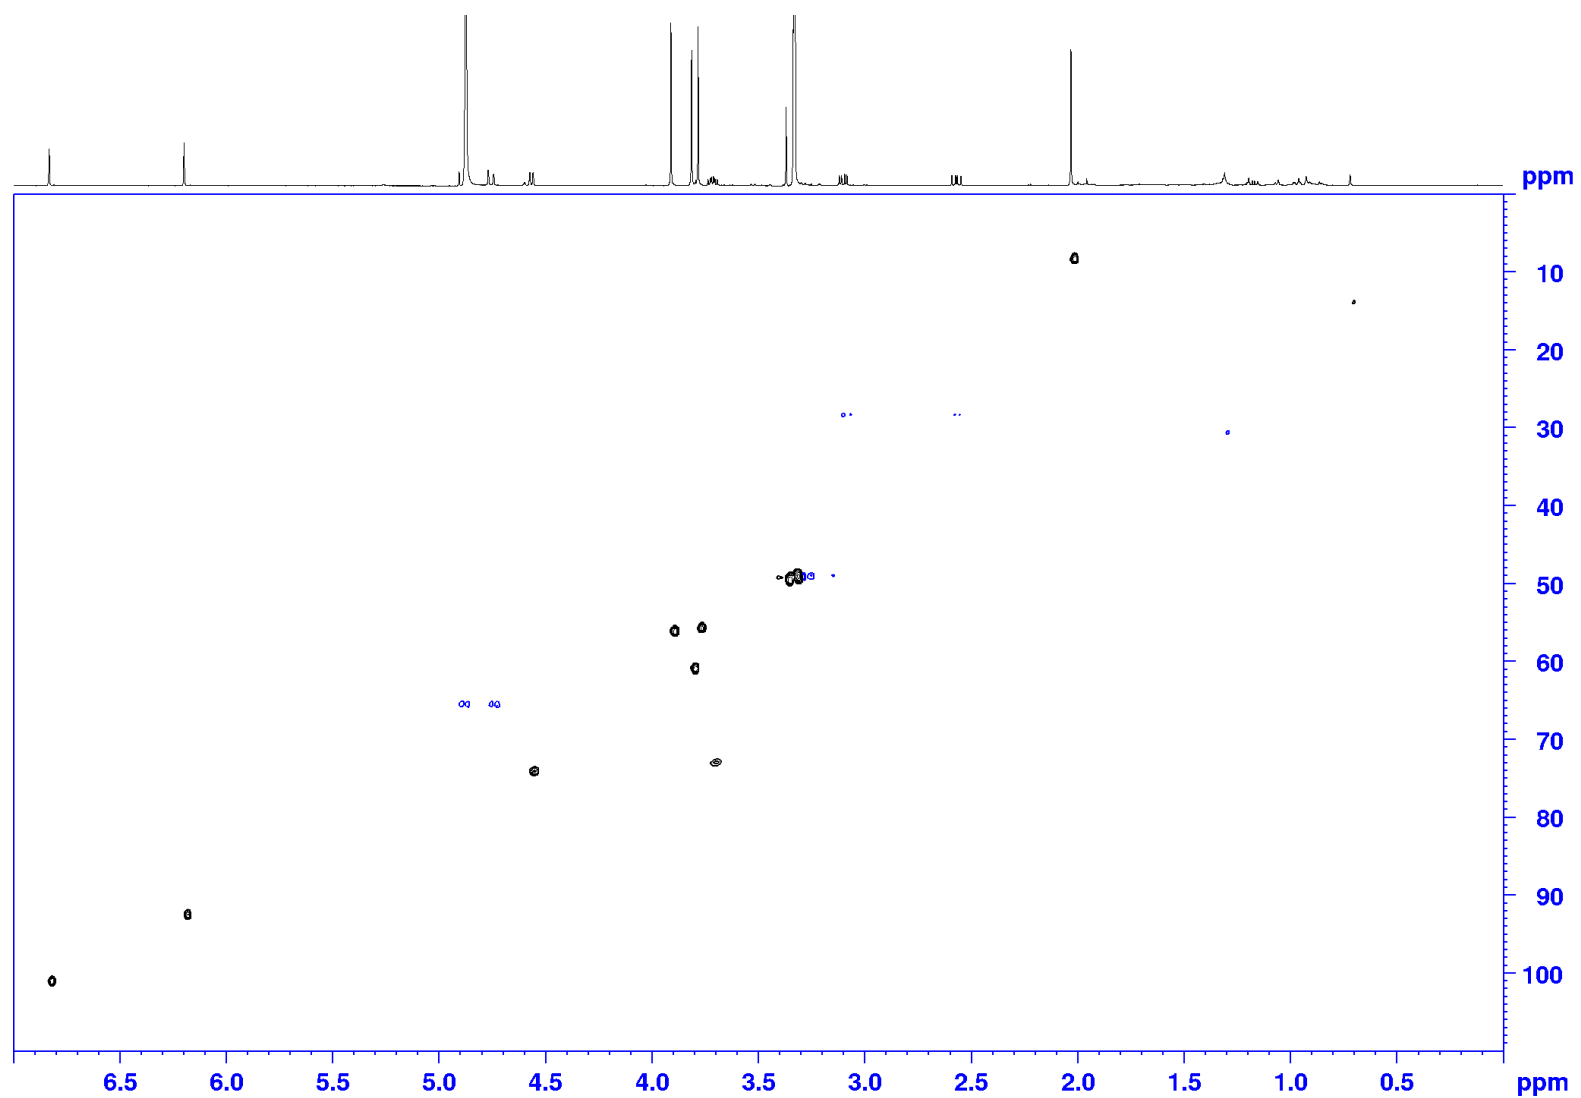

**Figure S23.** HSQC spectrum of compound **4** ( $\text{CD}_3\text{OD}$ , 600 MHz)



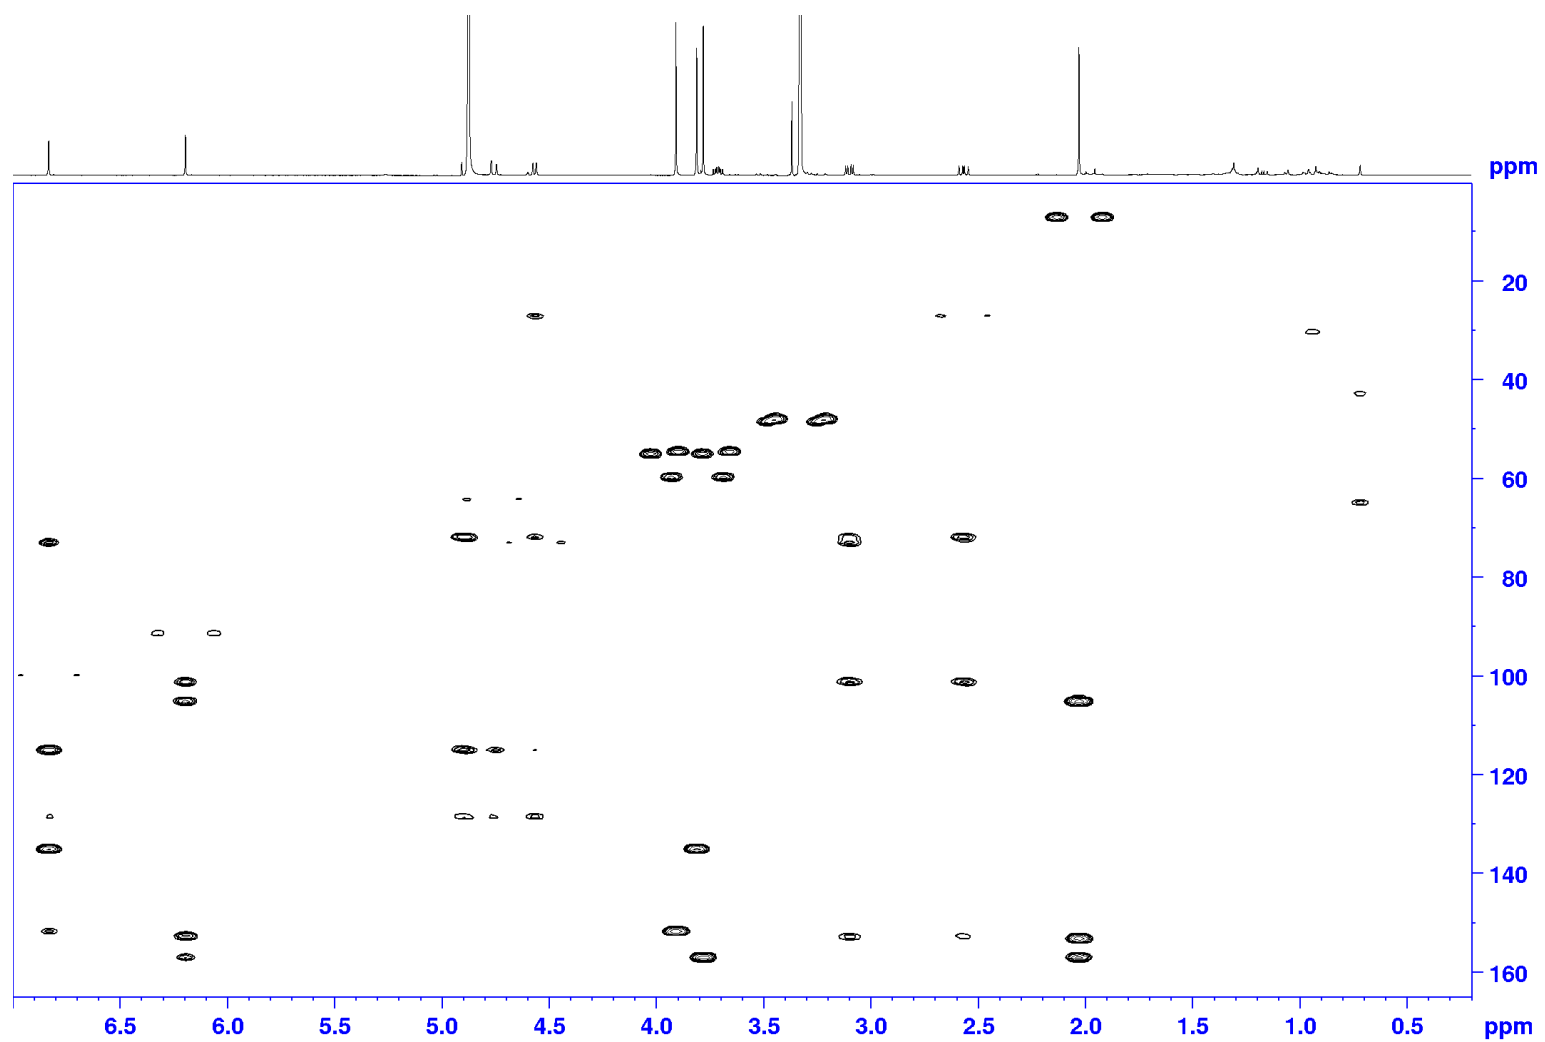

**Figure S24.** HMBC spectrum of compound **4** (CD<sub>3</sub>OD, 600 MHz)



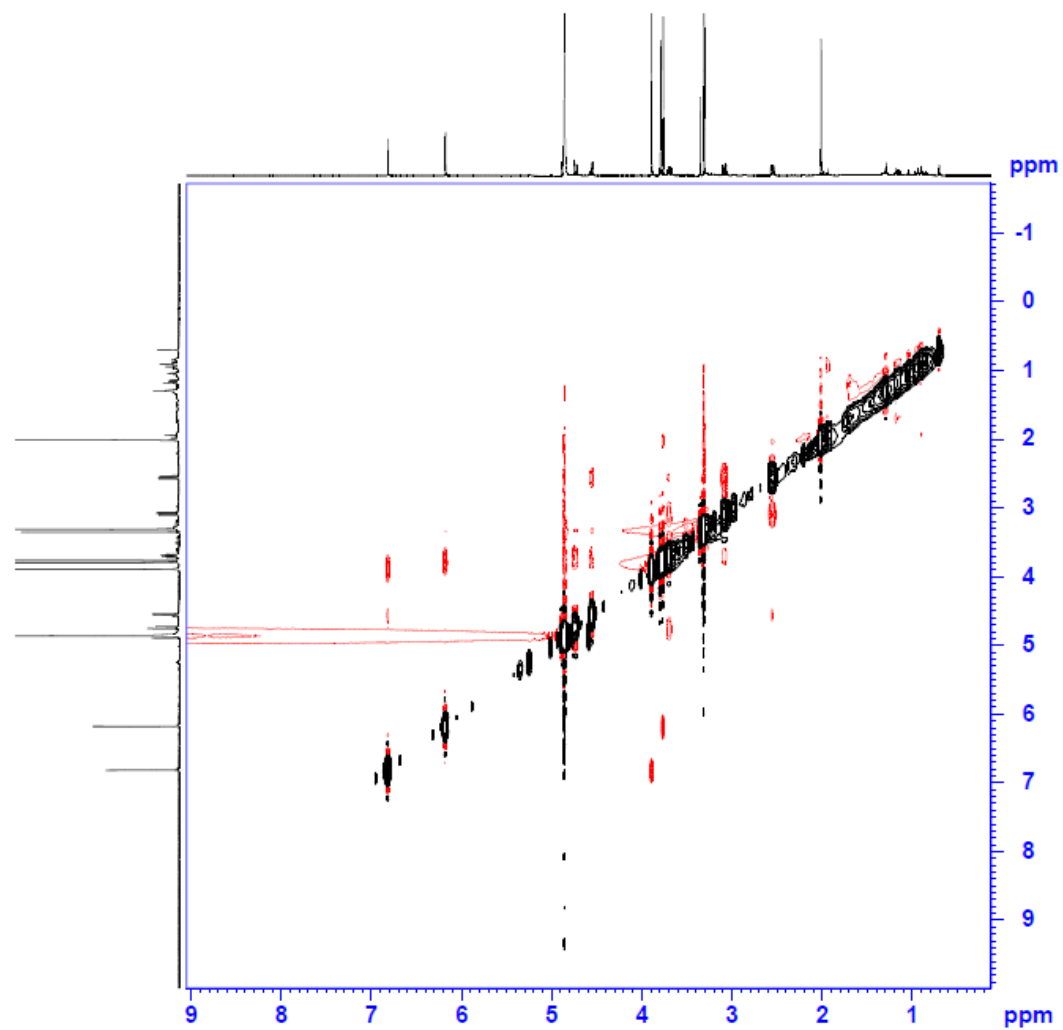

**Figure S25.** NOESY spectrum of compound **4** (CD<sub>3</sub>OD, 600 MHz)



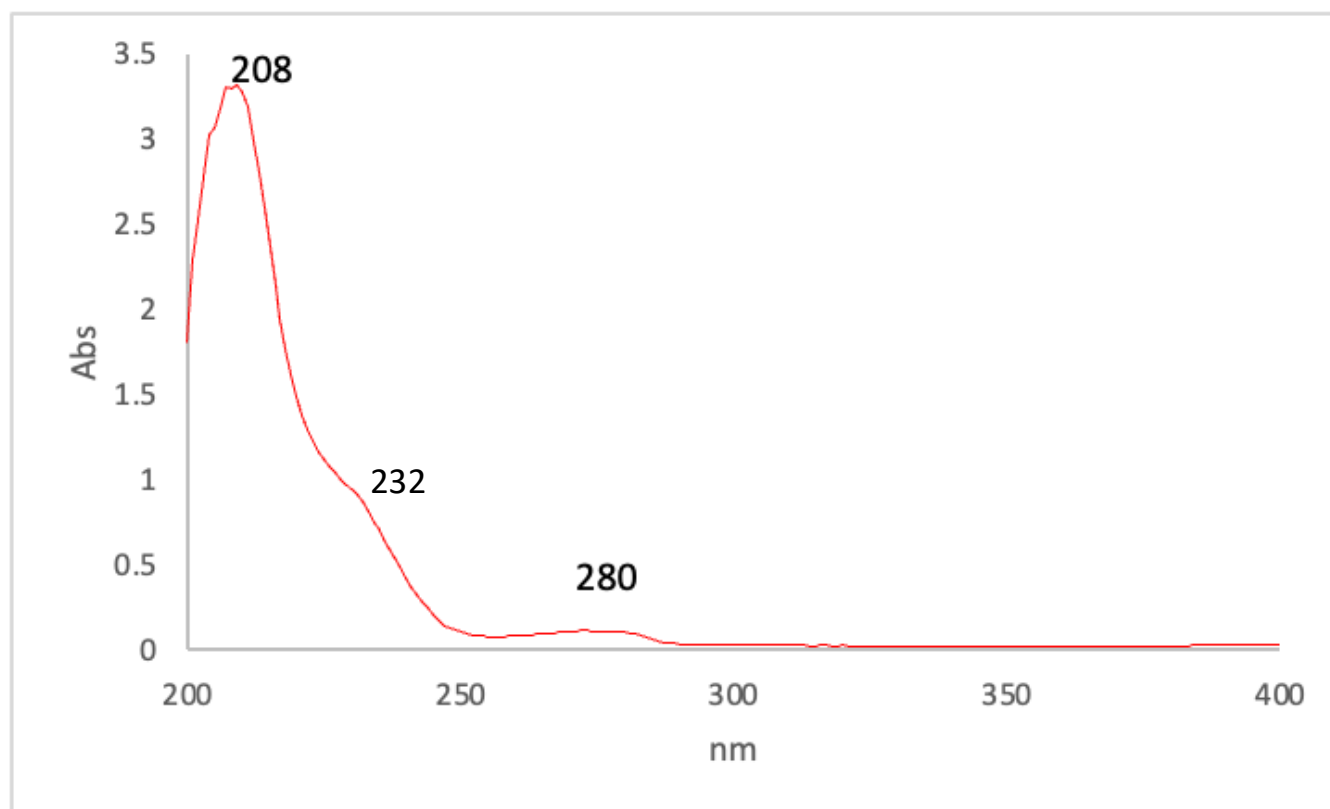

**Figure S26.** UV-Vis spectrum for compound **4**



## Elemental Composition Report

Page 1

### Single Mass Analysis

Tolerance = 10.0 PPM / DBE: min = -1.5, max = 50.0

Element prediction: Off

Number of isotope peaks used for i-FIT = 9

Monoisotopic Mass, Even Electron Ions

9 formula(e) evaluated with 1 results within limits (all results (up to 1000) for each mass)

Elements Used:

C: 0-20 H: 0-22 O: 0-8

221103\_BM\_F11B\_neg 17 (0.364) Cm (15:17)

1: TOF MS ES-

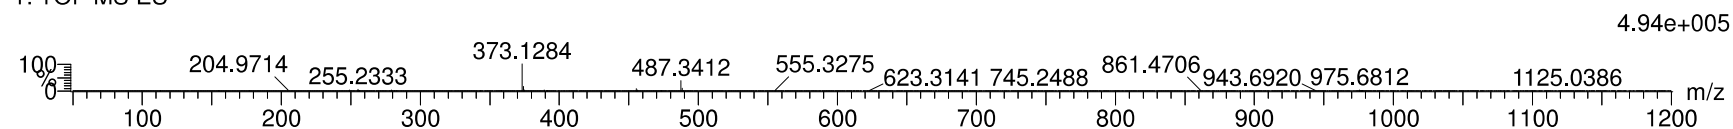

Minimum: -1.5  
Maximum: 20.0 10.0 50.0

| Mass     | Calc. Mass | mDa  | PPM  | DBE  | i-FIT  | Norm | Conf (%) | Formula    |
|----------|------------|------|------|------|--------|------|----------|------------|
| 373.1284 | 373.1287   | -0.3 | -0.8 | 10.5 | 1444.6 | n/a  | n/a      | C20 H21 O7 |

**Figure S27.** HRMS spectrum for compound **4**



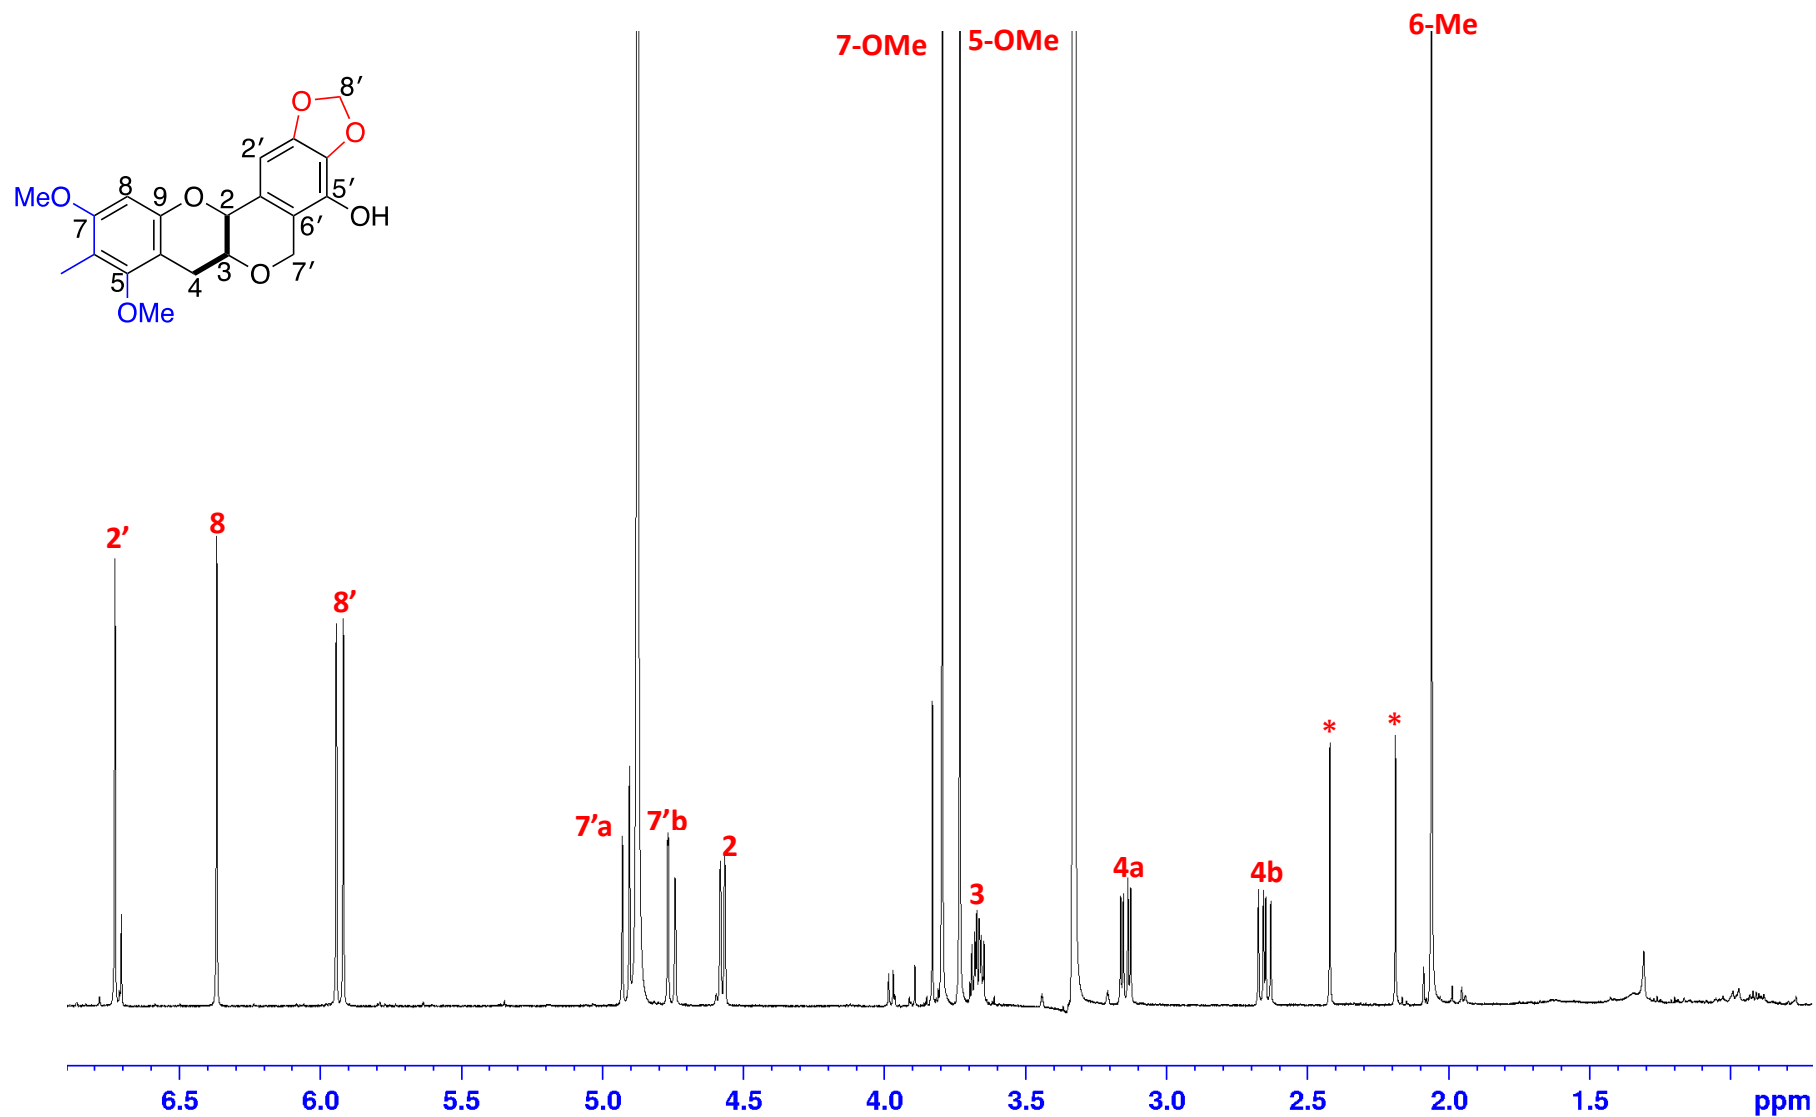

**Figure S28.**  $^1\text{H}$  NMR spectrum of compound **5** ( $\text{CD}_3\text{OD}$ , 600 MHz)



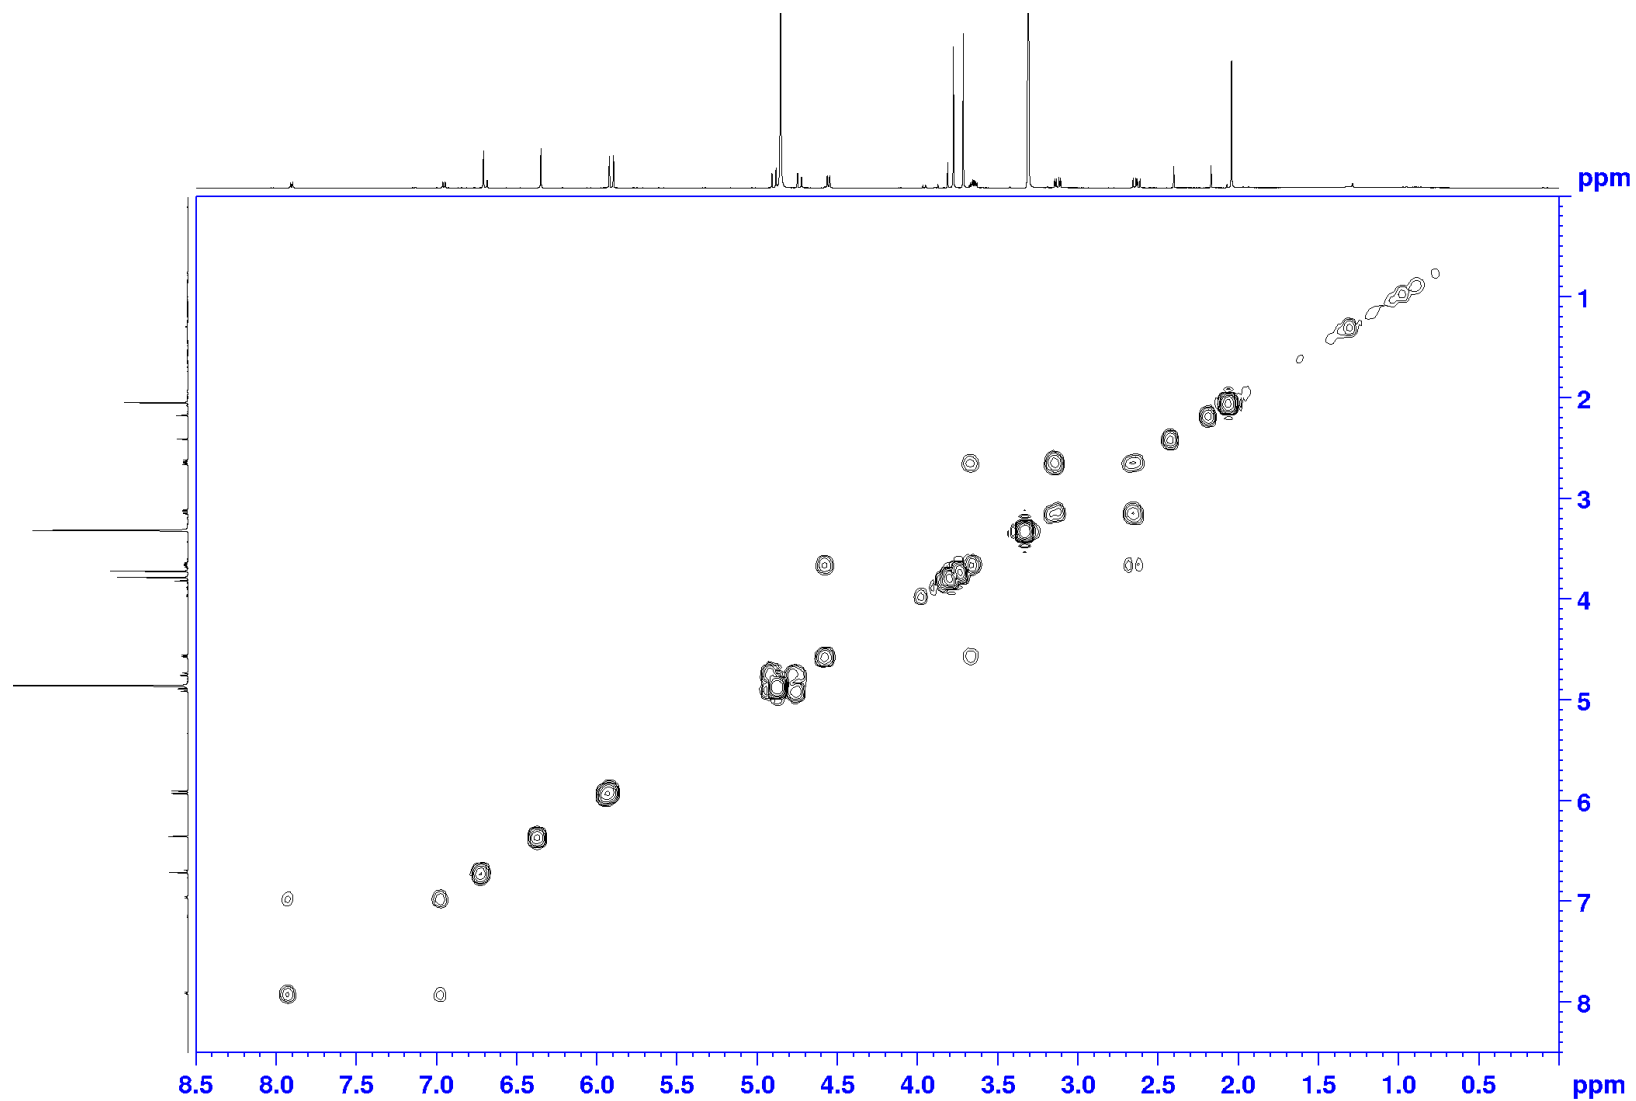



**Figure S29.** COSY spectrum of compound **5** (CD<sub>3</sub>OD, 600 MHz)

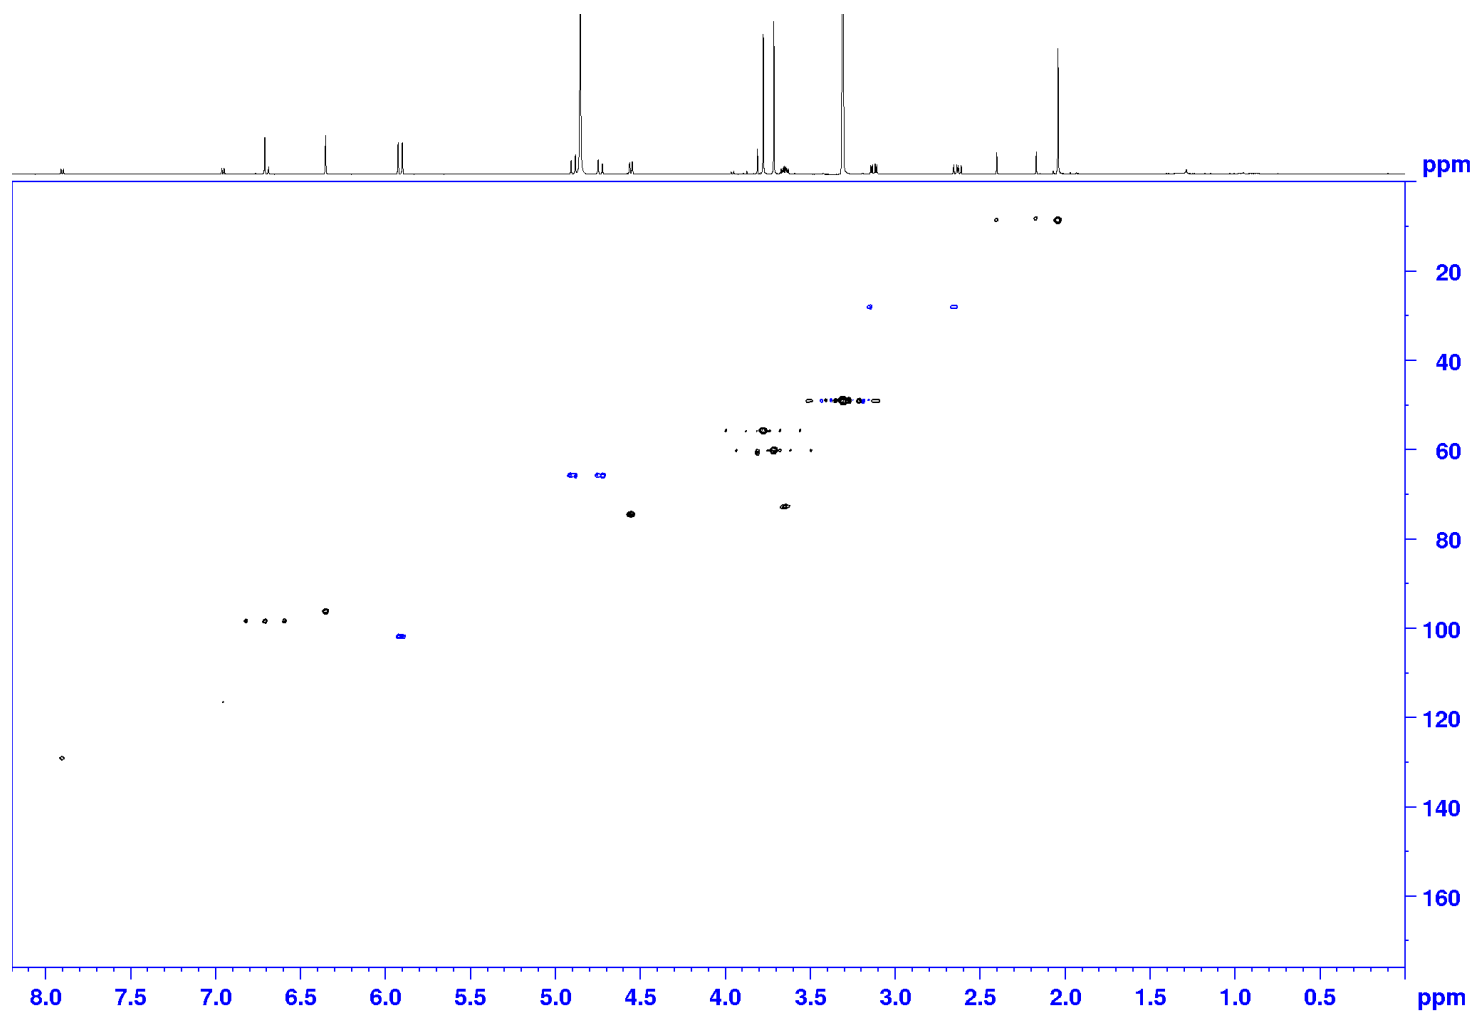

**Figure S30.** HSQC spectrum of compound **5** (CD<sub>3</sub>OD, 600 MHz)



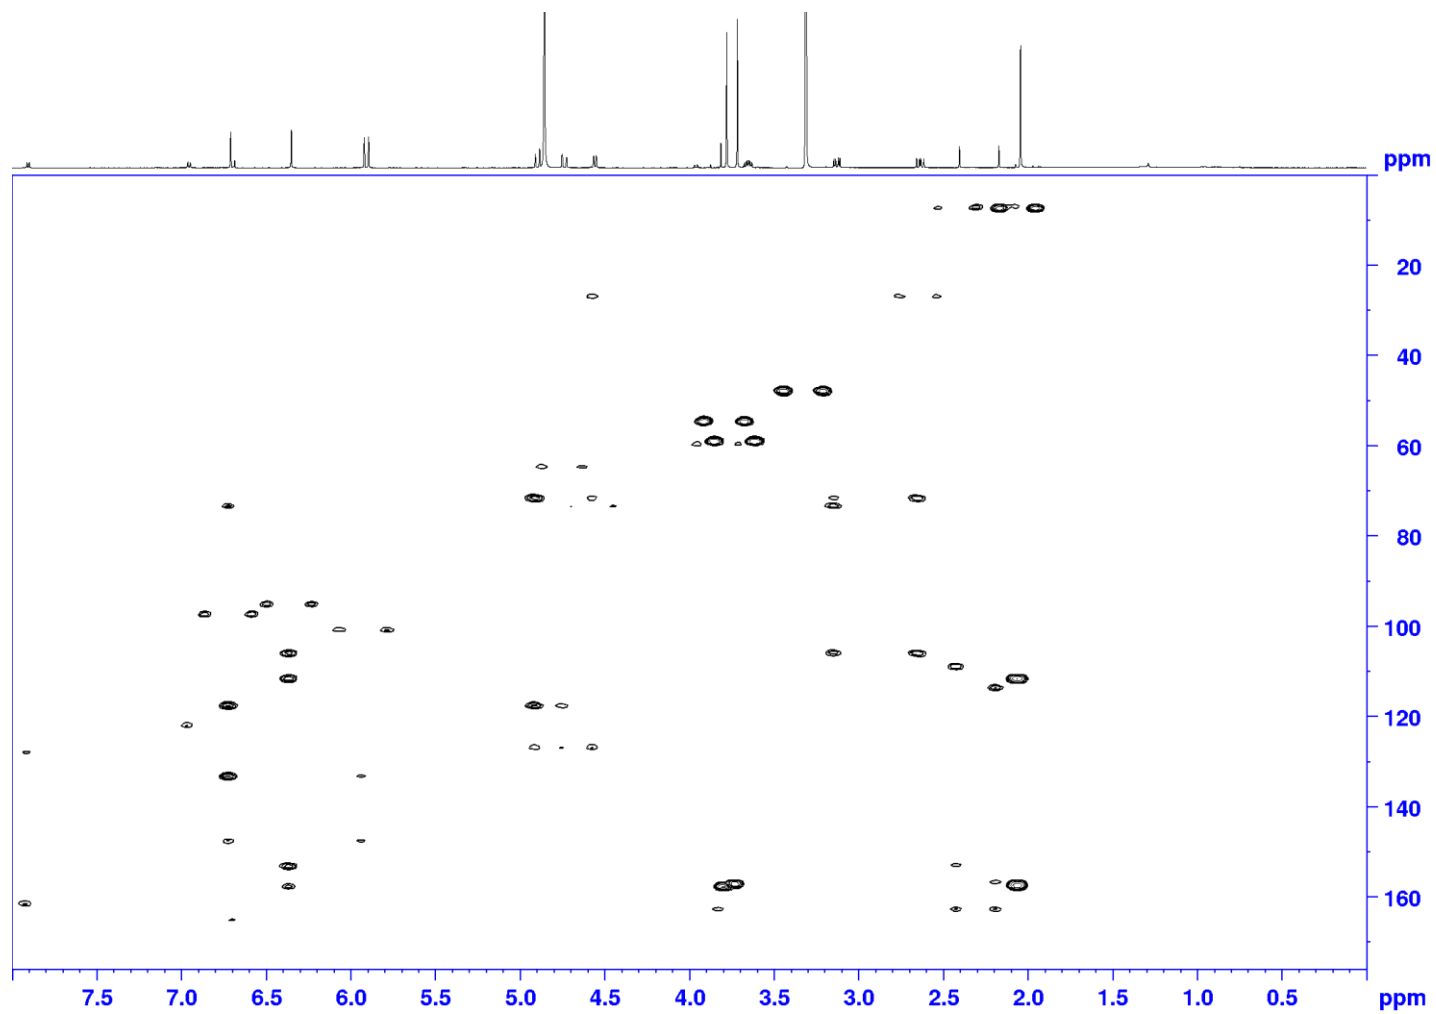

**Figure S31.** HMBC spectrum of compound **5** (CD<sub>3</sub>OD, 600 MHz)



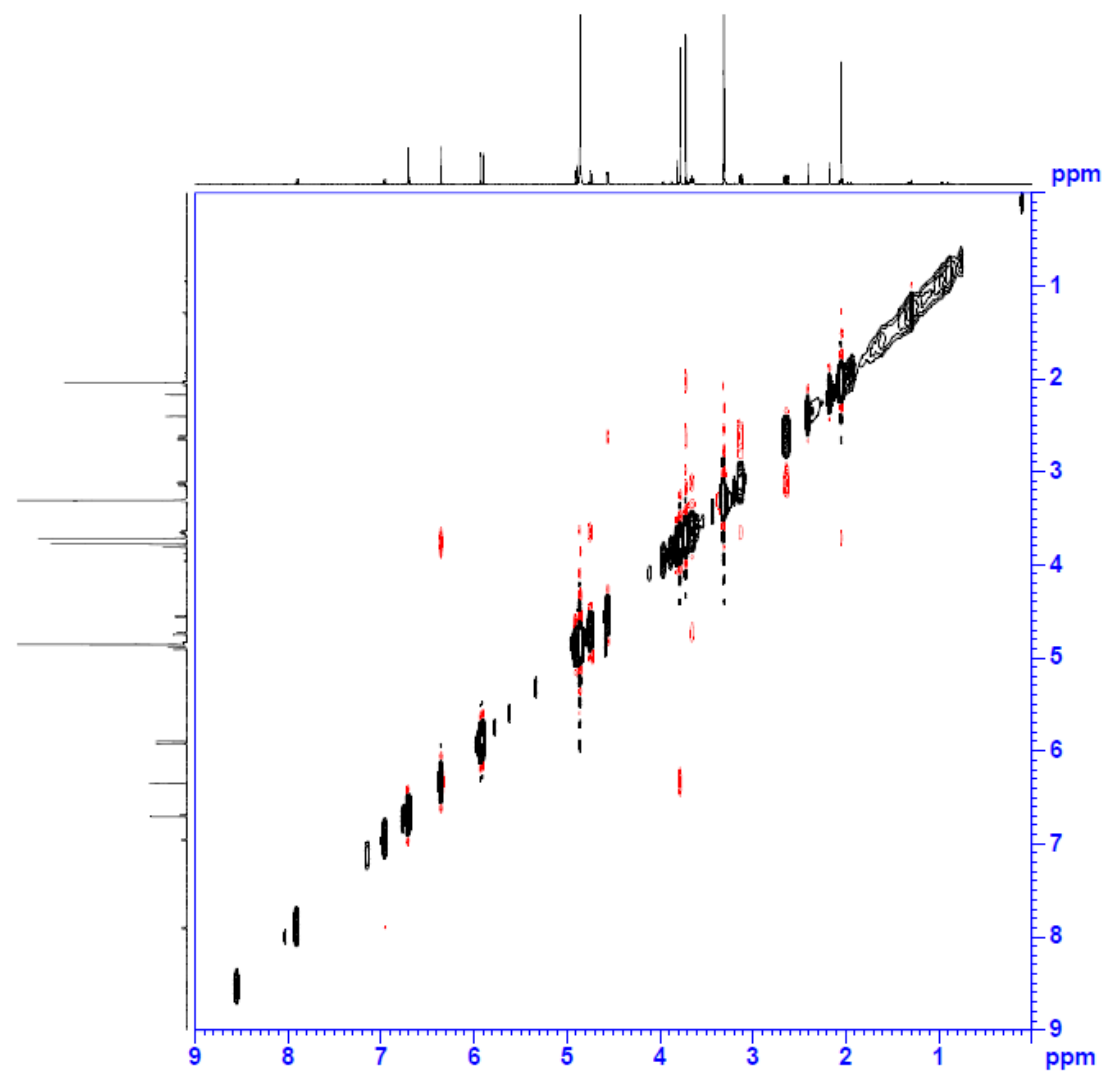



**Figure S32.** NOESY spectrum of compound **5** (CD<sub>3</sub>OD, 600 MHz)

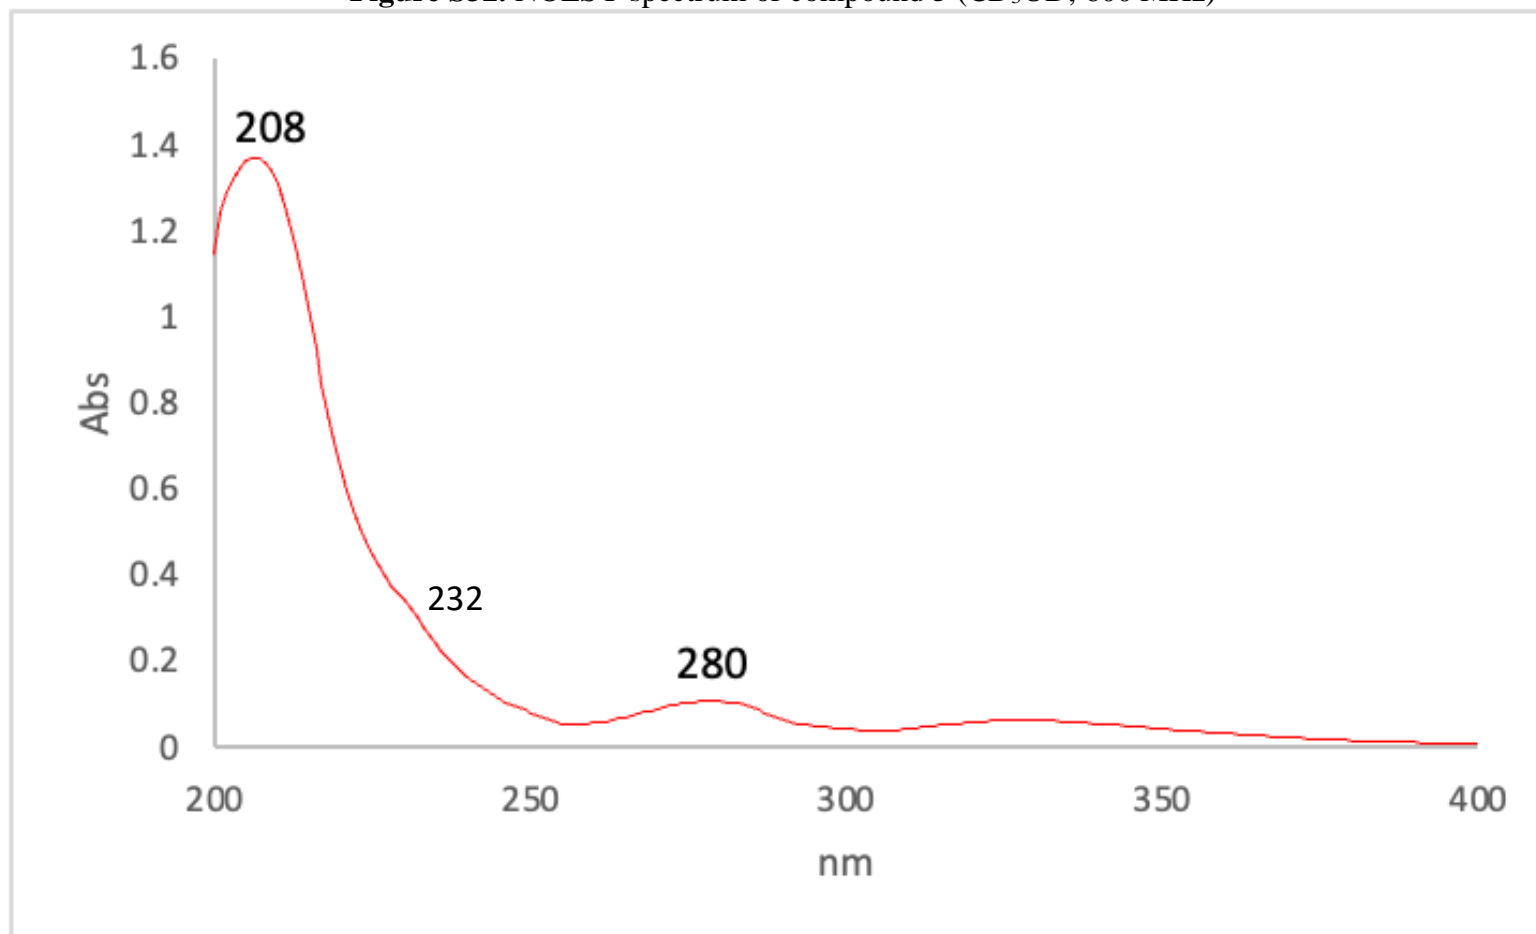

**Figure S33.** UV-Vis spectrum for compound **5**



## Elemental Composition Report

Page 1

### Single Mass Analysis

Tolerance = 5.0 PPM / DBE: min = -1.5, max = 50.0

Element prediction: Off

Number of isotope peaks used for i-FIT = 9

Monoisotopic Mass, Even Electron Ions

15 formula(e) evaluated with 1 results within limits (all results (up to 1000) for each mass)

Elements Used:

C: 0-25 H: 0-30 O: 0-8

01122022\_BMF-16B 122 (2.396) Cm (122)

1: TOF MS ES-

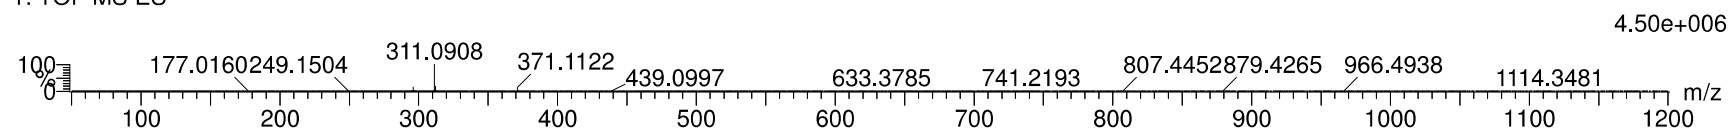

Minimum: -1.5  
Maximum: 20.0 5.0 50.0

| Mass     | Calc. Mass | mDa  | PPM  | DBE  | i-FIT  | Norm | Conf (%) | Formula    |
|----------|------------|------|------|------|--------|------|----------|------------|
| 371.1122 | 371.1131   | -0.9 | -2.4 | 11.5 | 1273.8 | n/a  | n/a      | C20 H19 O7 |

Figure S34. HRMS spectrum for compound 5



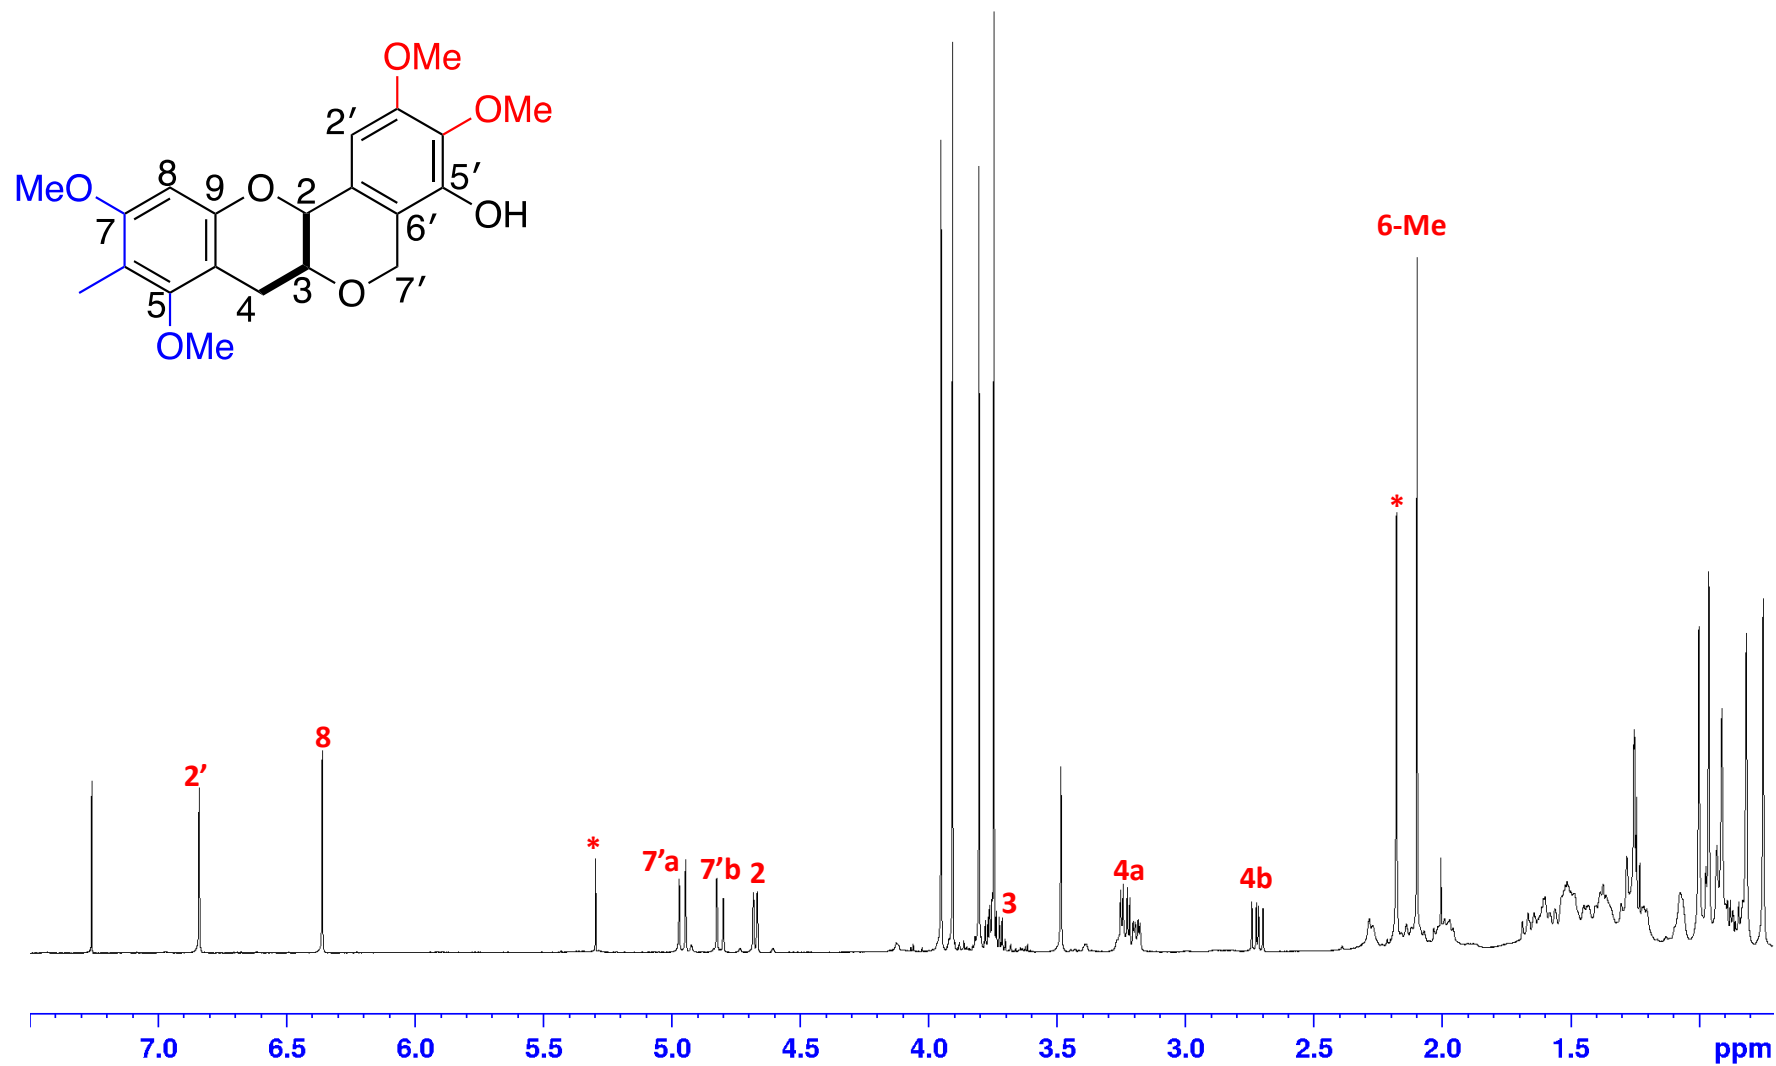

Figure S35.  $^1\text{H}$  NMR spectrum of compound **6** ( $\text{CDCl}_3$ , 600 MHz)



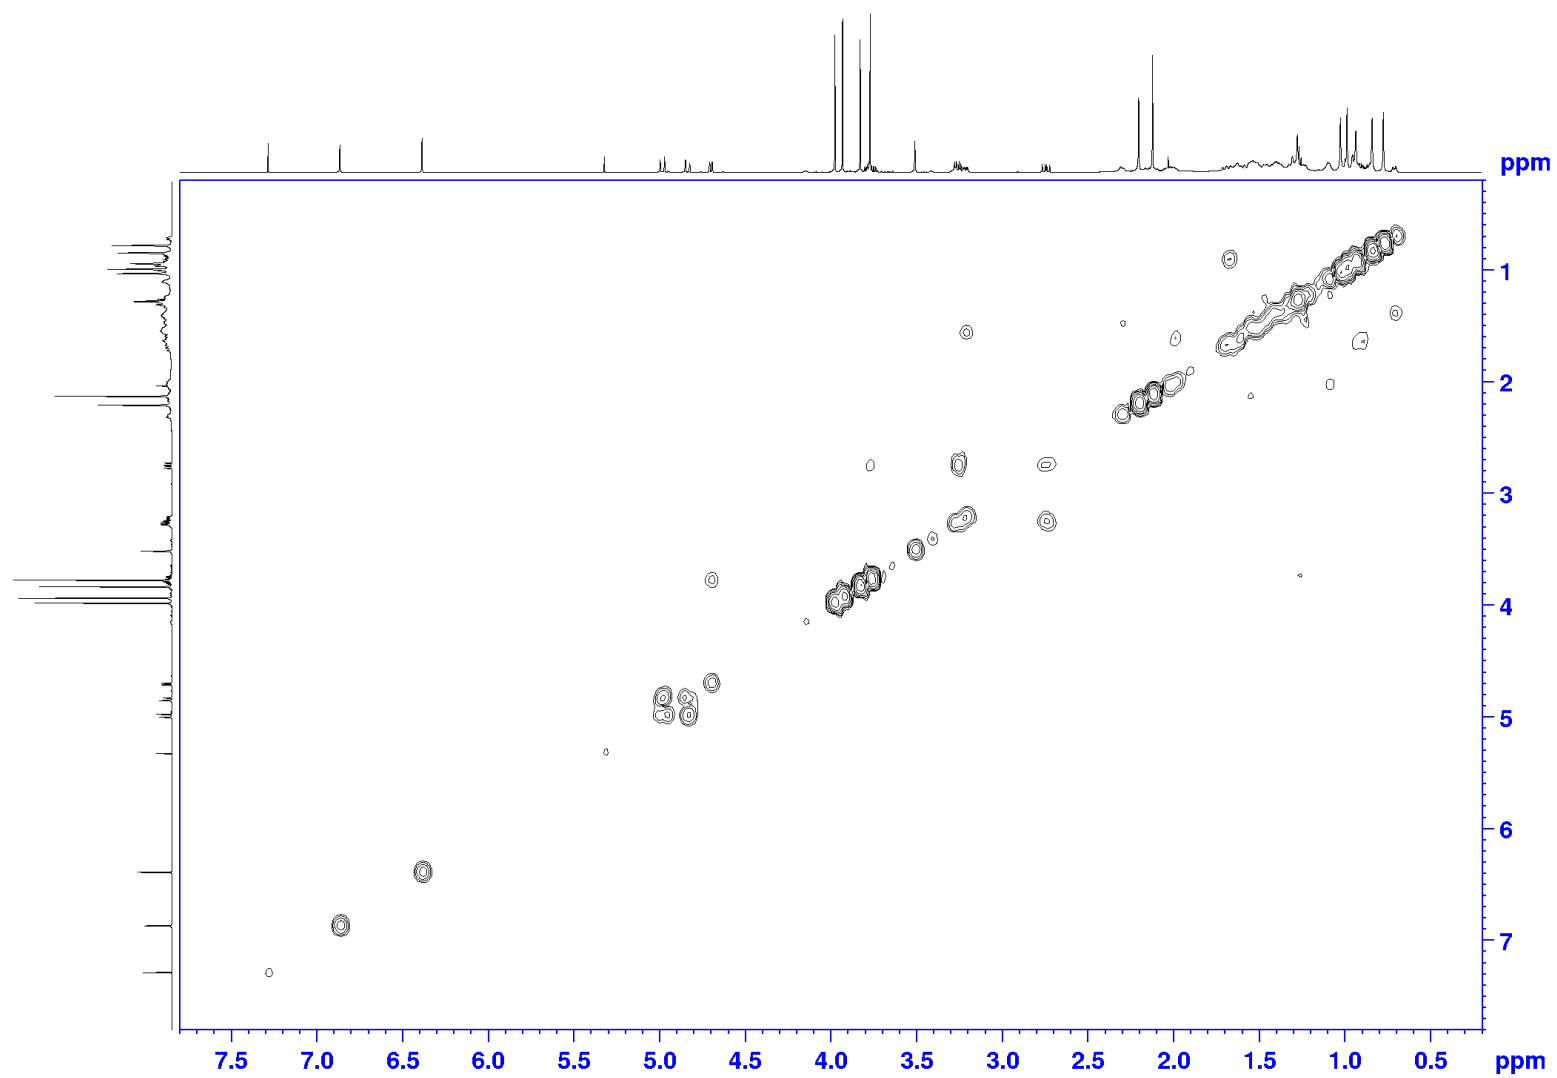

**Figure S36.** COSY spectrum of compound **6** (CDCl<sub>3</sub>, 600 MHz)



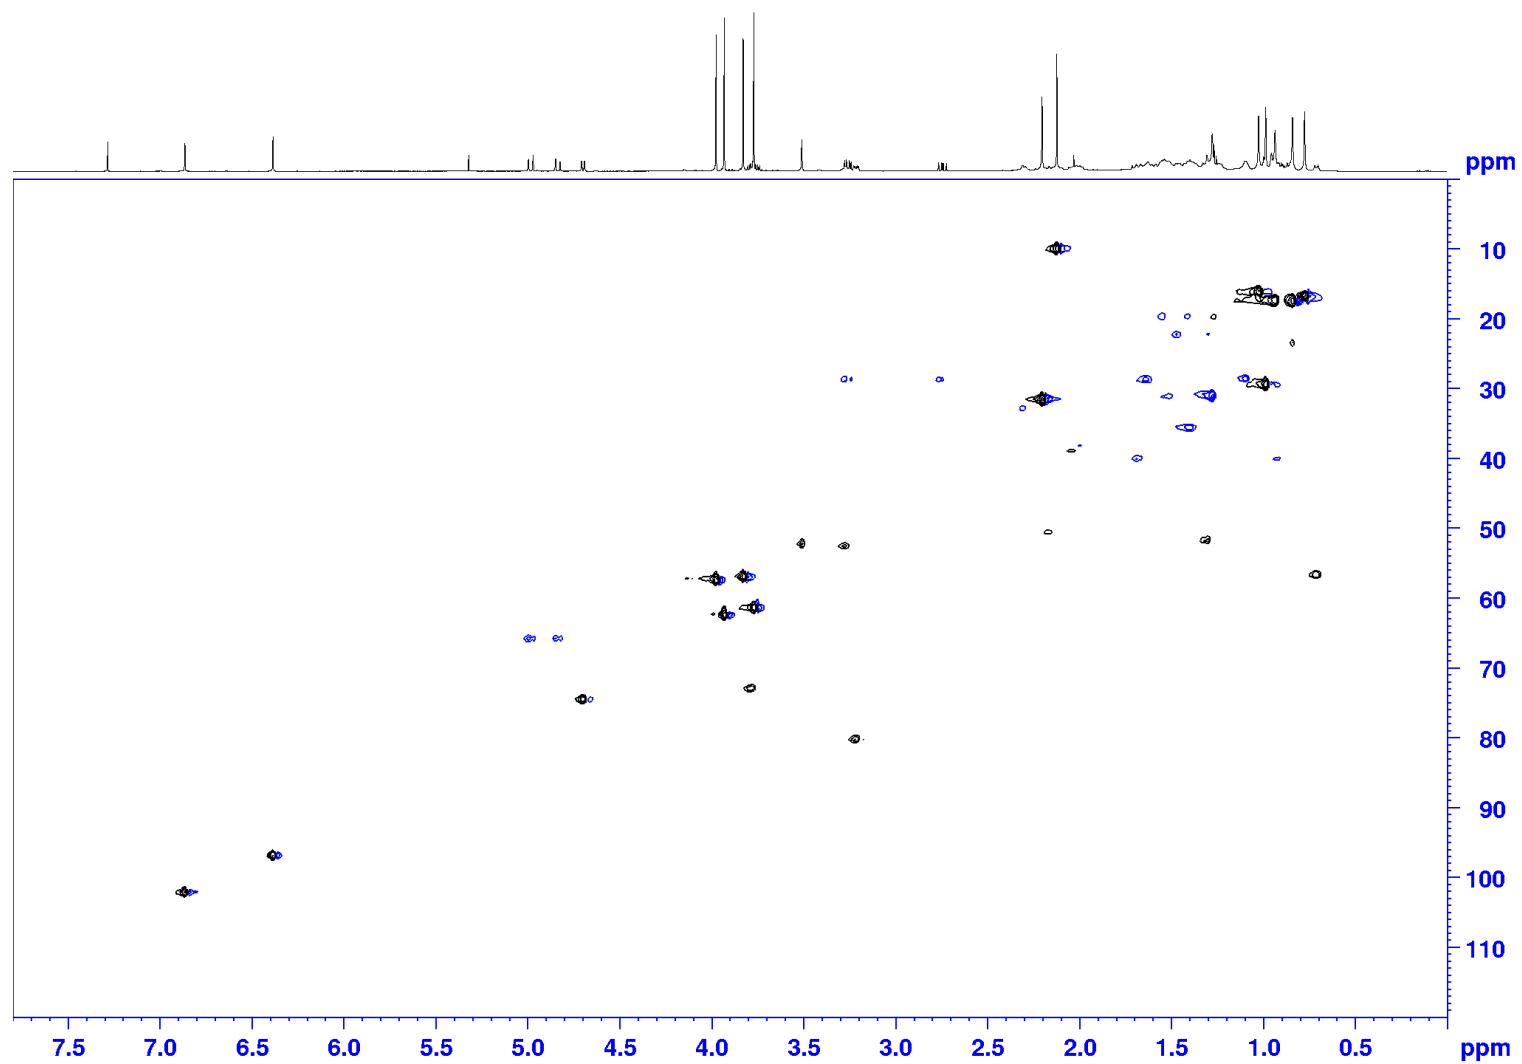

**Figure S37.** HSQC spectrum of compound **6** ( $\text{CDCl}_3$ , 600 MHz)



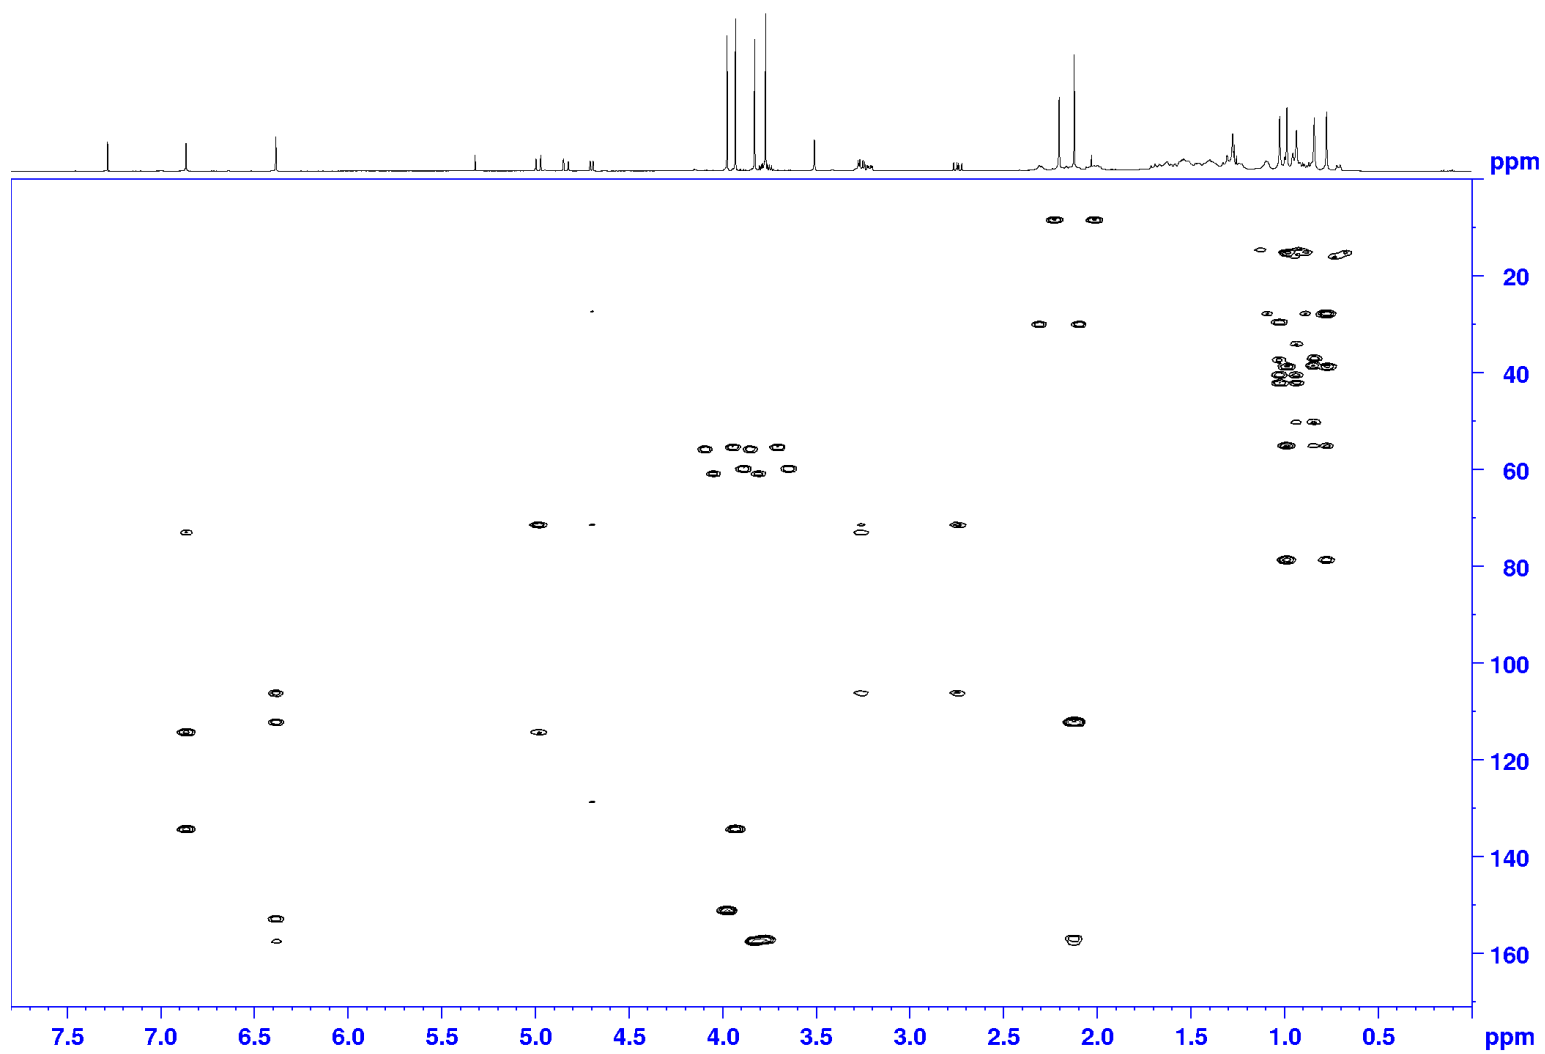

**Figure S38.** HMBC spectrum of compound **6** (CDCl<sub>3</sub>, 600 MHz)



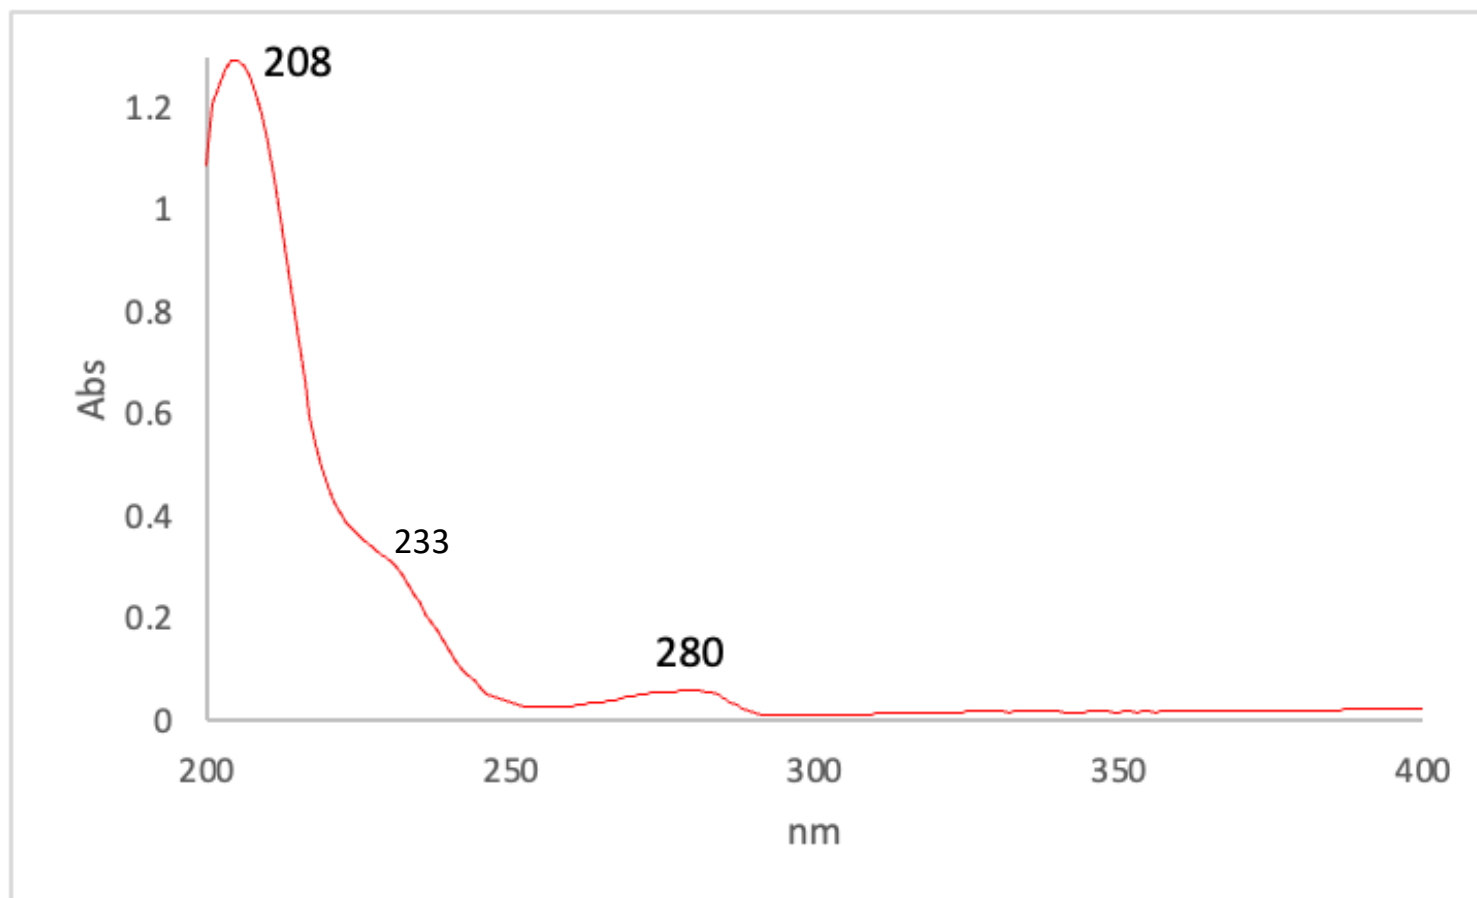

**Figure S39.** UV-Vis spectrum for compound **6**



## Elemental Composition Report

Page 1

### Single Mass Analysis

Tolerance = 10.0 PPM / DBE: min = -1.5, max = 50.0

Element prediction: Off

Number of isotope peaks used for i-FIT = 9

Monoisotopic Mass, Even Electron Ions

7 formula(e) evaluated with 1 results within limits (all results (up to 1000) for each mass)

Elements Used:

C: 0-21 H: 0-24 O: 0-7

221103\_BM\_F17A\_17 (0.364) Cm (17:18)

1: TOF MS ES-

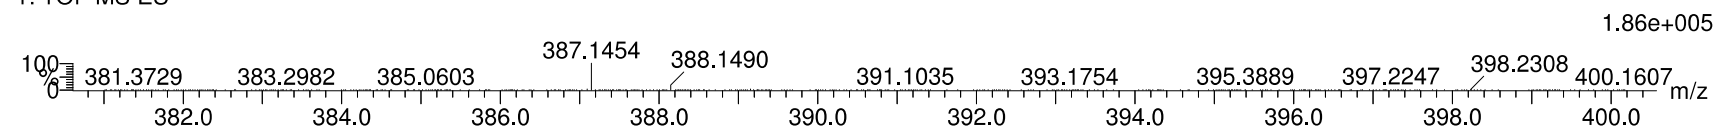

Minimum: -1.5  
Maximum: 20.0 10.0 50.0

| Mass     | Calc. Mass | mDa | PPM | DBE  | i-FIT  | Norm | Conf(%) | Formula    |
|----------|------------|-----|-----|------|--------|------|---------|------------|
| 387.1454 | 387.1444   | 1.0 | 2.6 | 10.5 | 1577.3 | n/a  | n/a     | C21 H23 O7 |

**Figure S40.** HRMS spectrum for compound **6**



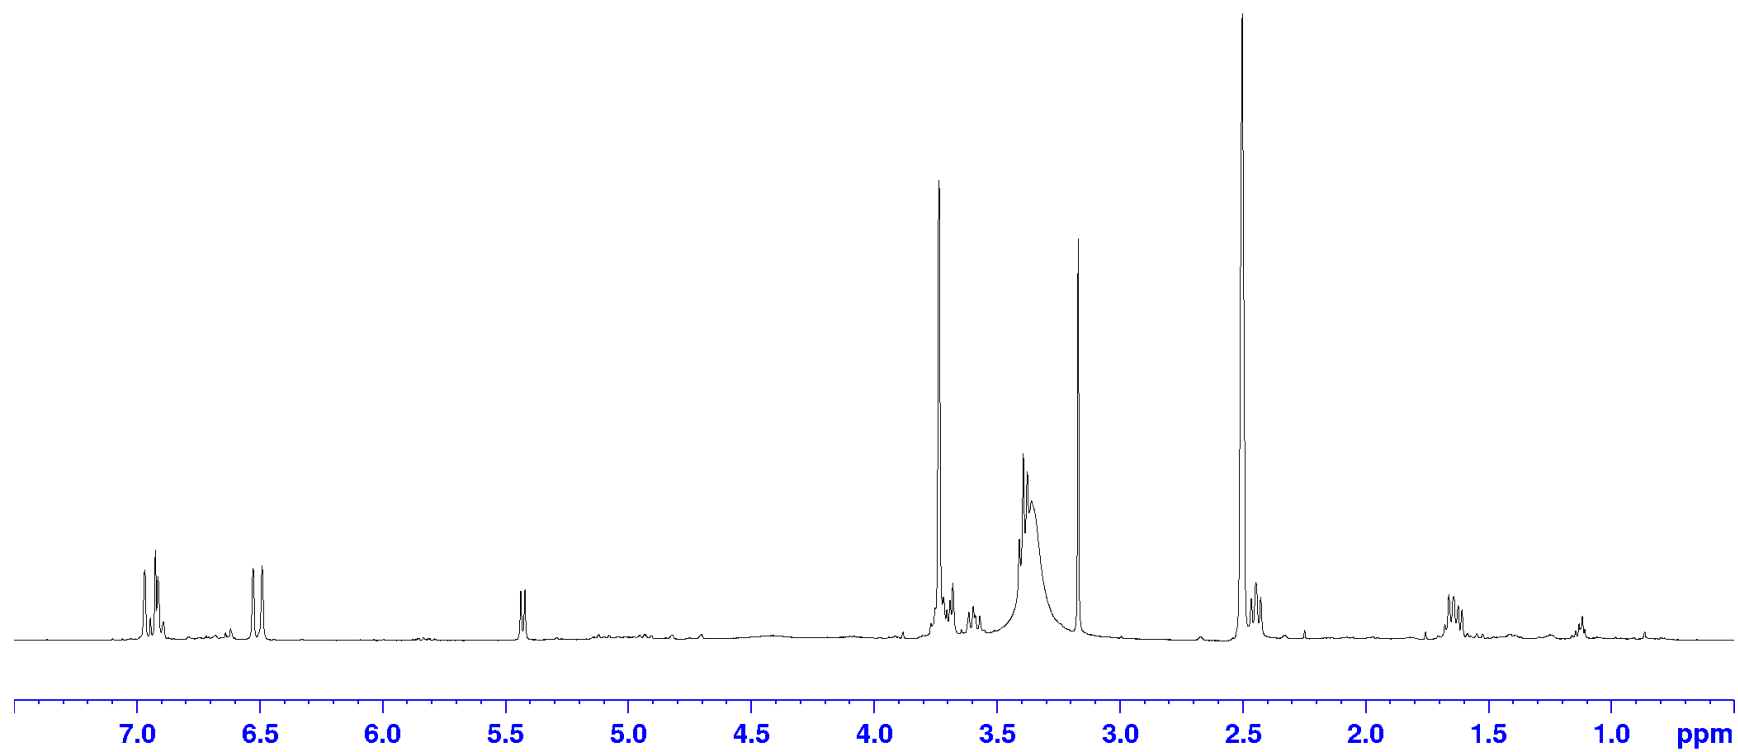

**Figure S41.**  $^1\text{H}$  NMR spectrum of compound **7** (DMSO- $\text{d}_6$ , 400 MHz)



## Elemental Composition Report

Page 1

### Single Mass Analysis

Tolerance = 5.0 PPM / DBE: min = -1.5, max = 50.0

Element prediction: Off

Number of isotope peaks used for i-FIT = 9

Monoisotopic Mass, Even Electron Ions

16 formula(e) evaluated with 1 results within limits (all results (up to 1000) for each mass)

Elements Used:

C: 0-25 H: 0-30 O: 0-8

011222\_BMF-4 122 (2.396) Cm (122)

1: TOF MS ES-

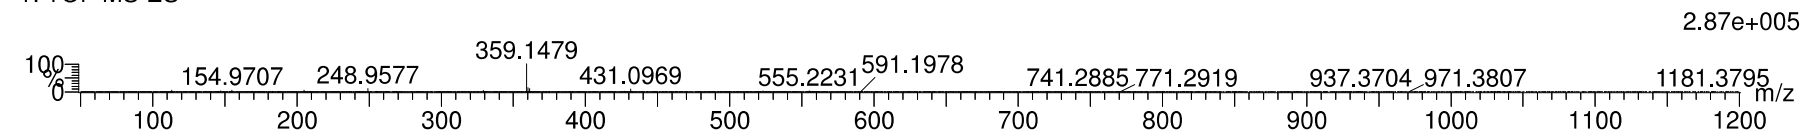

Minimum: -1.5

Maximum: 20.0 5.0 50.0

| Mass     | Calc. Mass | mDa  | PPM  | DBE | i-FIT  | Norm | Conf (%) | Formula    |
|----------|------------|------|------|-----|--------|------|----------|------------|
| 359.1479 | 359.1495   | -1.6 | -4.5 | 9.5 | 1187.0 | n/a  | n/a      | C20 H23 O6 |

**Figure S42.** HRMS spectrum for compound **7**



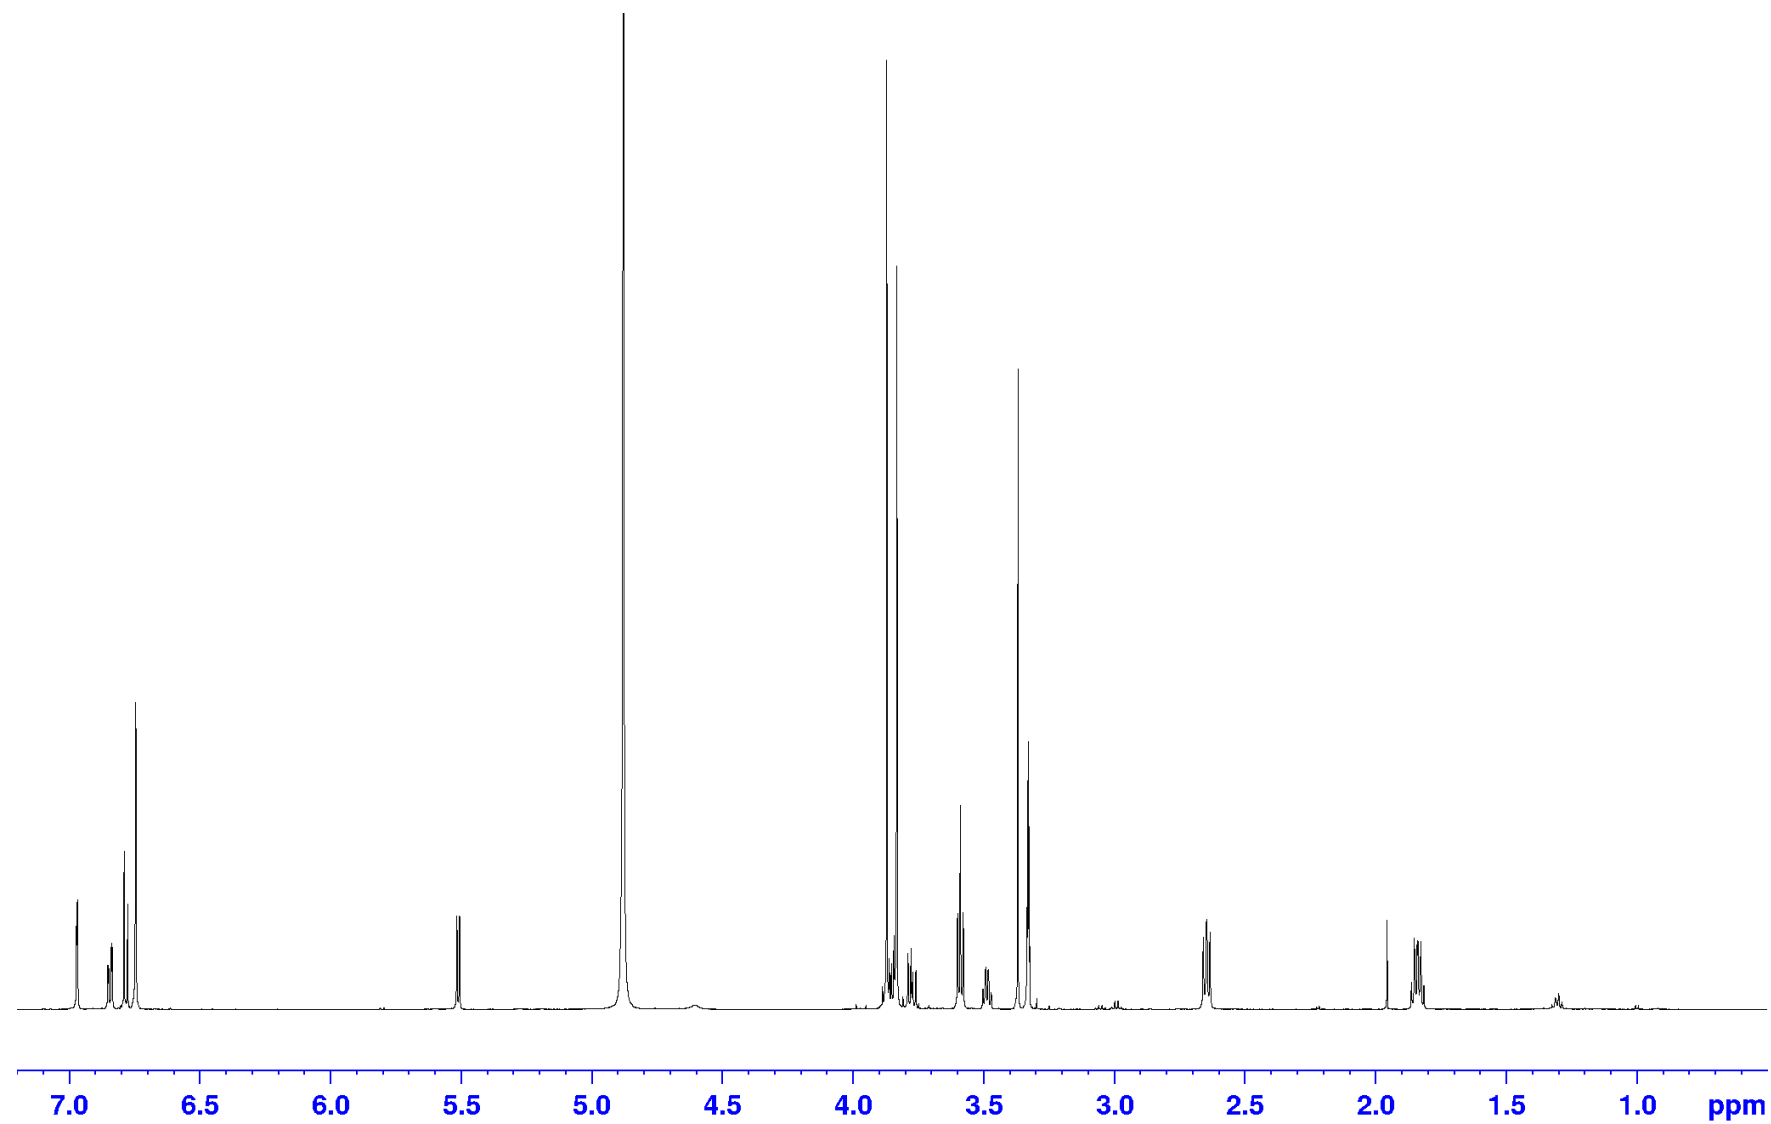

**Figure S43.**  $^1\text{H}$  NMR spectrum of compound **8** ( $\text{CD}_3\text{OD}$ , 600 MHz)



## Elemental Composition Report

Page 1

### Single Mass Analysis

Tolerance = 20.0 PPM / DBE: min = -1.5, max = 50.0

Element prediction: Off

Number of isotope peaks used for i-FIT = 9

Monoisotopic Mass, Even Electron Ions

70 formula(e) evaluated with 2 results within limits (all results (up to 1000) for each mass)

Elements Used:

C: 0-50 H: 0-50 O: 0-20

251222BMF-4A\_1 negative LS 73 (1.449)

1: TOF MS ES-

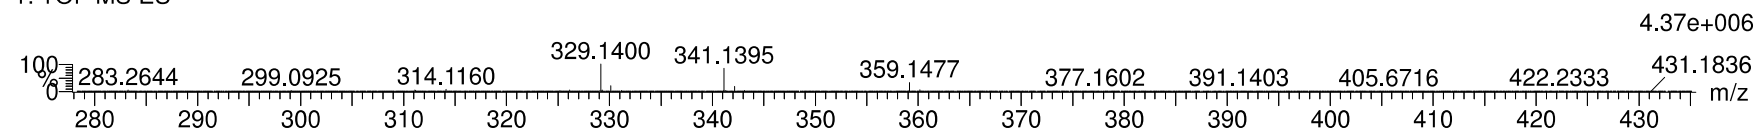

Minimum:

Maximum:

-1.5  
20.0 20.0 50.0

| Mass     | Calc. Mass | mDa  | PPM  | DBE  | i-FIT  | Norm  | Conf(%) | Formula    |
|----------|------------|------|------|------|--------|-------|---------|------------|
| 359.1477 | 359.1495   | -1.8 | -5.0 | 9.5  | 2548.8 | 0.000 | 99.99   | C20 H23 O6 |
|          | 359.1436   | 4.1  | 11.4 | 18.5 | 2558.6 | 9.820 | 0.01    | C27 H19 O  |

Figure S44. HRMS spectrum for compound 8



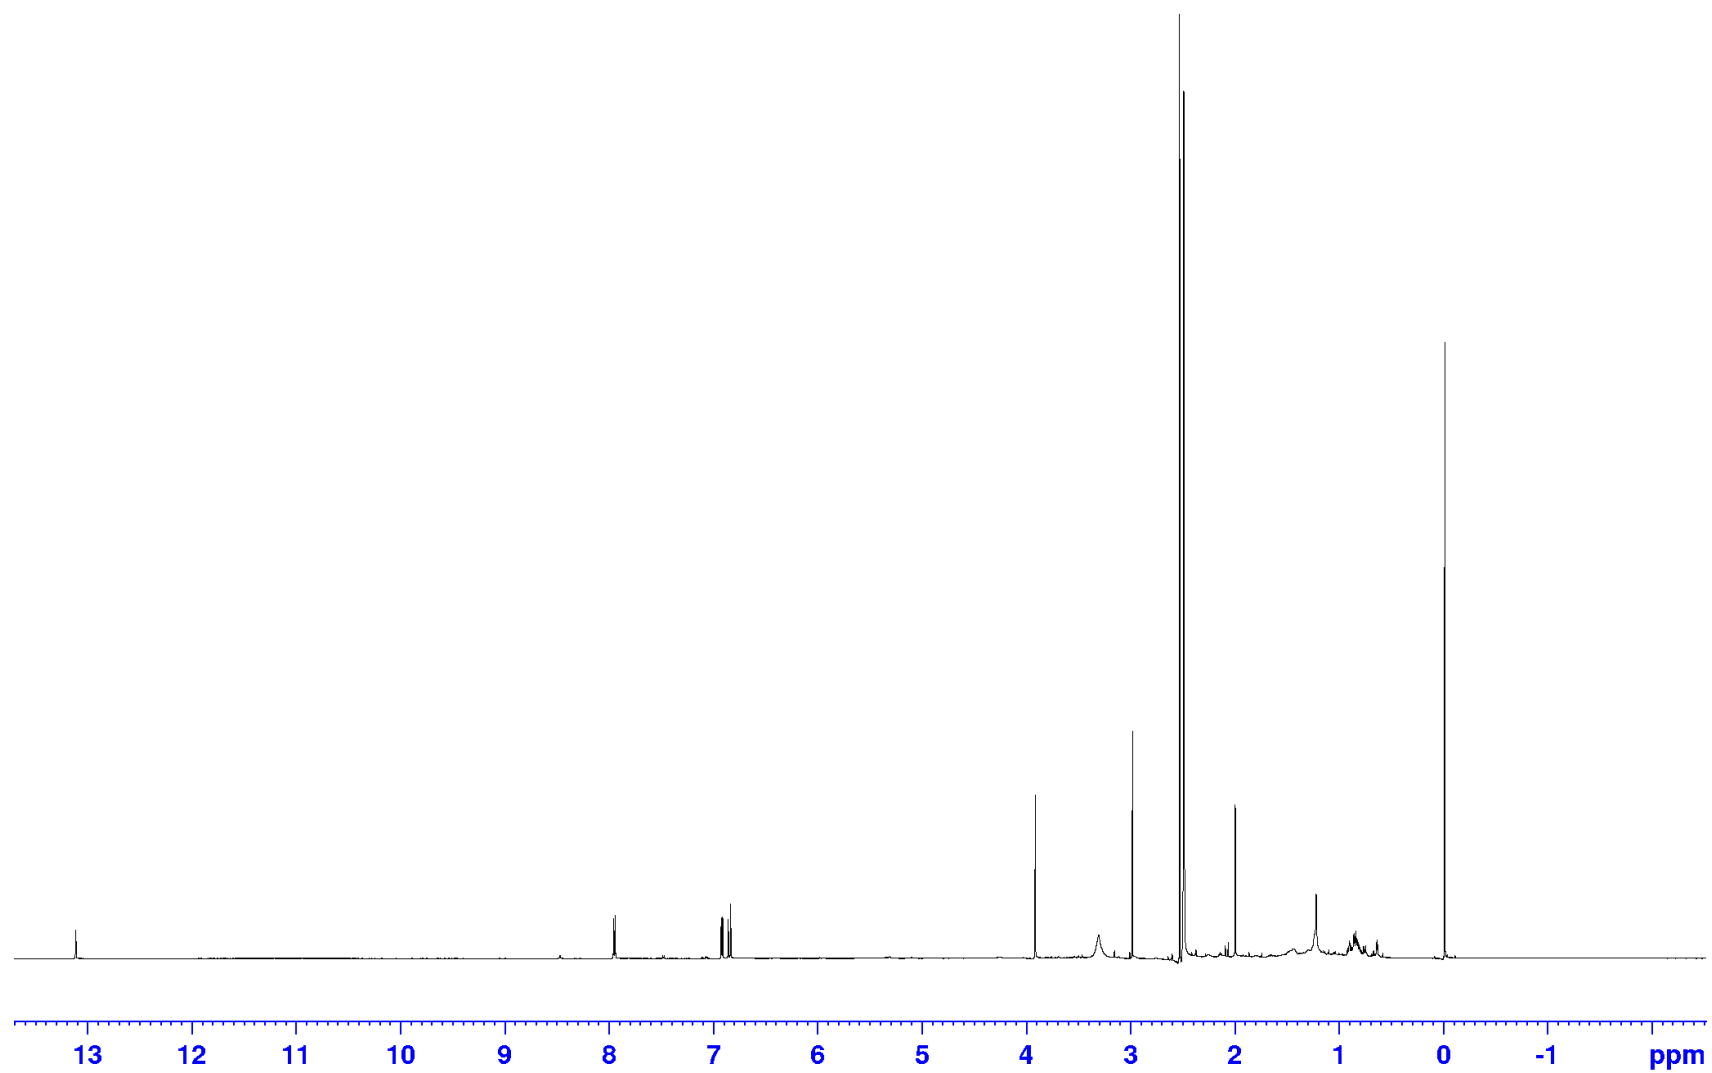

**Figure S45.**  $^1\text{H}$  NMR spectrum of compound **9** ( $\text{DMSO-d}_6$ , 600 MHz)



## Elemental Composition Report

Page 1

### Single Mass Analysis

Tolerance = 5.0 PPM / DBE: min = -1.5, max = 50.0

Element prediction: Off

Number of isotope peaks used for i-FIT = 9

Monoisotopic Mass, Even Electron Ions

24 formula(e) evaluated with 1 results within limits (all results (up to 1000) for each mass)

Elements Used:

C: 0-25 H: 0-30 O: 0-8

011222\_BMF-15 122 (2.396) Cm (122)

1: TOF MS ES-

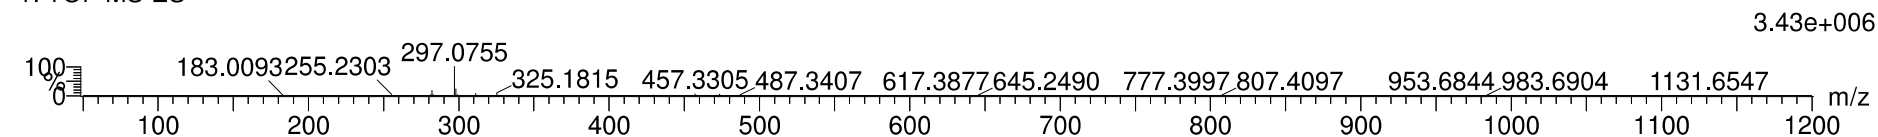

Minimum: -1.5  
Maximum: 20.0 5.0 50.0

| Mass     | Calc. Mass | mDa  | PPM  | DBE  | i-FIT  | Norm | Conf (%) | Formula    |
|----------|------------|------|------|------|--------|------|----------|------------|
| 297.0755 | 297.0763   | -0.8 | -2.7 | 11.5 | 2162.9 | n/a  | n/a      | C17 H13 O5 |

Figure S46. HRMS spectrum for compound 9



**Table S2.** NMR data (600 MHz, CD<sub>3</sub>OD) for compound **1**

| Position | $\delta_{\text{H}}$ , mult, ( <i>J</i> in Hz) | * $\delta_{\text{C}}$ (ppm) | COSY | HMBC          |
|----------|-----------------------------------------------|-----------------------------|------|---------------|
| 2        | 4.53 d (9.0)                                  | 74.6                        | 3    | 3, 4, 1', 6'  |
| 3        | 3.64 m                                        | 73.1                        | 2,4  |               |
| 4        | 3.11 dd (15.5, 6.0)<br>2.63 dd (15.5, 10.7)   | 28.2                        | 3    | 3, 5, 9, 10   |
| 5        |                                               | 157.6                       |      |               |
| 6        |                                               | 110.5                       |      |               |
| 7        |                                               | 155.2                       |      |               |
| 8        | 6.21 s                                        | 99.7                        |      | 6, 7, 9, 10   |
| 9        |                                               | 152.9                       |      |               |
| 10       |                                               | 105.1                       |      |               |
| 5-OMe    | 3.71 s                                        | 60.3                        |      | 5             |
| 6-Me     | 2.05 s                                        | 8.6                         |      | 5, 6, 7       |
| 7-OMe    |                                               |                             |      |               |
| 1'       |                                               | 117.7                       |      |               |
| 2'       | 6.66 s                                        | 98.4                        |      | 1', 2, 3', 4' |
| 3'       |                                               | 133.4                       |      |               |
| 4'       |                                               | 147.6                       |      |               |
| 5'       |                                               | 135.7                       |      |               |
| 6'       |                                               | 126.9                       |      |               |
| 7'       | 4.89 d (15.2)<br>4.73 d (15.2)                | 65.8                        |      | 3, 1', 5', 6' |
| 8'       | 5.91 d (15.3)                                 | 101.9                       |      | 3', 4'        |
| 3' OMe   |                                               |                             |      |               |
| 4' OMe   |                                               |                             |      |               |

\*assignments supported by HSQC and HMBC experiments



**Table S3.** NMR data (600 MHz, CD<sub>3</sub>OD) for compound **2**

| Position | $\delta_{\text{H}}$ , mult, ( <i>J</i> in Hz) | * $\delta_{\text{C}}$ (ppm) | COSY | HMBC             | NOESY  |
|----------|-----------------------------------------------|-----------------------------|------|------------------|--------|
| 2        | 4.57 d (9.5)                                  | 74.4                        | 3    | 3, 4, 1', 2', 6' |        |
| 3        | 3.67 ddd (10.7, 9.5, 6.1)                     | 72.9                        | 2, 4 |                  | 7'     |
| 4        | 3.15 dd (15.4, 6.1)                           | 28.1                        | 3    | 2, 3, 5, 9, 10   |        |
|          | 2.66 dd (15.4, 10.7)                          |                             |      |                  |        |
| 5        |                                               | 158.8                       |      |                  |        |
| 6        |                                               | 111.6                       |      |                  |        |
| 7        |                                               | 156.2                       |      |                  |        |
| 8        | 6.23 s                                        | 99.4                        |      | 6,7,9,10         |        |
| 9        |                                               | 154.0                       |      |                  |        |
| 10       |                                               | 106.8                       |      |                  |        |
| 5-OMe    | 3.72 s                                        | 60.2                        |      | 5                | 6-Me   |
| 6-Me     | 2.07 s                                        | 8.4                         |      | 5,6,7            | 5-OMe  |
| 7-OMe    |                                               |                             |      |                  |        |
| 1'       |                                               | 116.0                       |      |                  |        |
| 2'       | 6.78 s                                        | 101.3                       |      | 2, 1', 3', 4'    | 3' OMe |
| 3'       |                                               | 136.2                       |      |                  |        |
| 4'       |                                               | 153.2                       |      |                  |        |
| 5'       |                                               | 146.4                       |      |                  |        |
| 6'       |                                               | 129.7                       |      |                  |        |
| 7'       | 4.88 (15.3)                                   | 65.5                        |      | 3, 1', 5', 6'    | 3      |
|          | 4.73 (15.3)                                   |                             |      |                  |        |
| 8'       |                                               | 101.3                       |      |                  |        |
| 3' OMe   | 3.88 s                                        | 56.3                        |      | 3'               | 2'     |
| 4' OMe   | 3.79 s                                        | 60.9                        |      | 4'               |        |

\*assignments supported by HSQC and HMBC experiments



**Table S4.** NMR data (600 MHz, CD<sub>3</sub>OD) for compound **3**

| Position | $\delta_{\text{H}}$ , mult, ( <i>J</i> in Hz) | * $\delta_{\text{C}}$ (ppm) | COSY | HMBC              | NOESY  |
|----------|-----------------------------------------------|-----------------------------|------|-------------------|--------|
| 2        | 4.74 d (9.9)                                  | 72.7                        | 3    | 3, 1', 6'         |        |
| 3        | 3.67 dd (9.9, 8.3)                            | 78.3                        | 2,4  |                   |        |
| 4        | 5.01 d (8.3)                                  | 70.6                        | 3    | 3,9,10            |        |
| 5        |                                               | 156.8                       |      |                   |        |
| 6        |                                               | 106.8                       |      |                   |        |
| 7        |                                               | 160.0                       |      |                   |        |
| 8        | 6.15 s                                        | 92.1                        |      | 6,7,9,10          | 7-OMe  |
| 9        |                                               | 154.0                       |      |                   |        |
| 10       |                                               | 103.8                       |      |                   |        |
| 5-OMe    |                                               |                             |      |                   |        |
| 6-Me     | 1.98 s                                        | 7.7                         |      | 5,6,7             |        |
| 7-OMe    | 3.77 s                                        | 55.8                        |      | 7                 | 8      |
| 1'       |                                               | 116.1                       |      |                   |        |
| 2'       | 6.79 s                                        | 101.4                       |      | 2, 1', 3', 4', 6' | 3' OMe |
| 3'       |                                               | 135.5                       |      |                   |        |
| 4'       |                                               | 153.2                       |      |                   |        |
| 5'       |                                               | 147.0                       |      |                   |        |
| 6'       |                                               | 129.4                       |      |                   |        |
| 7'       | 4.92 d (15.1)<br>4.72 d (15.1)                | 65.6                        |      | 3, 1', 5', 6'     |        |
| 8'       |                                               |                             |      |                   |        |
| 3' OMe   | 3.89 s                                        | 56.2                        |      | 3'                | 2'     |
| 4' OMe   | 3.81 s                                        | 60.8                        |      | 4'                |        |

\*assignments supported by HSQC and HMBC experiments



**Table S5.** NMR data (600 MHz, CD<sub>3</sub>OD) for compound **4**

| Position | $\delta_{\text{H}}$ , mult, ( <i>J</i> in Hz) | * $\delta_{\text{C}}$ (ppm) | COSY | HMBC              | NOESY  |
|----------|-----------------------------------------------|-----------------------------|------|-------------------|--------|
| 2        | 4.56 d (9.6)                                  | 74.2                        | 3    | 3, 1', 6'         |        |
| 3        | 3.71 ddd (10.5, 9.6, 6.1)                     | 73.3                        | 2,4  |                   | 7'     |
| 4        | 3.10 dd (15.4, 6.1)<br>2.57 dd (15.4, 10.5)   | 28.6                        | 3    | 3,9,10            |        |
| 5        |                                               | 158.8                       |      |                   |        |
| 6        |                                               | 106.5                       |      |                   |        |
| 7        |                                               | 158.5                       |      |                   |        |
| 8        | 6.19 s                                        | 92.4                        |      | 6,7,9,10          |        |
| 9        |                                               | 154.2                       |      |                   |        |
| 10       |                                               | 102.8                       |      |                   |        |
| 5-OMe    |                                               |                             |      |                   |        |
| 6-Me     | 2.02 s                                        | 8.1                         |      | 5,6,7             | 7-OMe  |
| 7-OMe    | 3.76 s                                        | 55.8                        |      | 7                 | 6-Me   |
| 1'       |                                               | 116.3                       |      |                   |        |
| 2'       | 6.83 s                                        | 101.0                       |      | 2, 1', 3', 4', 6' | 3' OMe |
| 3'       |                                               | 136.2                       |      |                   |        |
| 4'       |                                               | 153.3                       |      |                   |        |
| 5'       |                                               | 147.1                       |      |                   |        |
| 6'       |                                               | 130.1                       |      |                   |        |
| 7'       | 4.89 d (14.0)<br>4.74 d (15.1)                | 65.5                        |      | 3, 1', 5', 6'     | 3      |
| 8'       |                                               |                             |      |                   |        |
| 3' OMe   | 3.89 s                                        | 56.2                        |      | 3'                | 2'     |
| 4' OMe   | 3.79 s                                        | 60.9                        |      | 4'                |        |

\*assignments supported by HSQC and HMBC experiments



**Table S6.** NMR data (600 MHz, CD<sub>3</sub>OD) for compound **5**

| Position | $\delta_{\text{H}}$ , mult, ( <i>J</i> in Hz)                 | * $\delta_{\text{C}}$ (ppm) | COSY | HMBC              | NOESY |
|----------|---------------------------------------------------------------|-----------------------------|------|-------------------|-------|
| 2        | 4.58 d ( <i>9.1</i> )                                         | 74.6                        | 3    | 3, 1', 6'         |       |
| 3        | 3.67 ddd ( <i>10.6, 9.1, 5.9</i> )                            | 72.7                        | 2,4  |                   |       |
| 4        | 3.14 dd ( <i>15.4, 5.9</i> )<br>2.65 dd ( <i>15.4, 10.6</i> ) | 28.0                        | 3    | 2,3,5, 9,10       |       |
| 5        |                                                               | 158.3                       |      |                   |       |
| 6        |                                                               | 112.8                       |      |                   |       |
| 7        |                                                               | 158.8                       |      |                   |       |
| 8        | 6.36 s                                                        | 101.9                       |      | 6,7,9,10          | 7-OMe |
| 9        |                                                               | 154.8                       |      |                   |       |
| 10       |                                                               | 108.0                       |      |                   |       |
| 5-OMe    | 3.73 s                                                        | 60.1                        |      |                   | 6-Me  |
| 6-Me     | 2.06 s                                                        | 8.7                         |      | 5,6,7             | 5-OMe |
| 7-OMe    | 3.80 s                                                        | 55.7                        |      | 7                 | 8     |
| 1'       |                                                               | 118.4                       |      |                   |       |
| 2'       | 6.72 s                                                        | 98.6                        |      | 2, 1', 3', 4', 6' |       |
| 3'       |                                                               | 134.9                       |      |                   |       |
| 4'       |                                                               | 148.8                       |      |                   |       |
| 5'       |                                                               | 137.5                       |      |                   |       |
| 6'       |                                                               | 128.4                       |      |                   |       |
| 7'       | 4.91 d ( <i>15.2</i> )<br>4.76 d ( <i>15.2</i> )              | 65.8                        |      | 3, 1', 5', 6'     |       |
| 8'       | 5.93 d ( <i>14.0</i> )                                        | 101.9                       |      | 3', 4'            |       |
| 3' OMe   |                                                               |                             |      |                   |       |
| 4' OMe   |                                                               |                             |      |                   |       |

\*assignments supported by HSQC and HMBC experiments



**Table S7.** NMR data (600 MHz, CDCl<sub>3</sub>) for compound **6**

| Position | $\delta_{\text{H}}$ , mult, ( <i>J</i> in Hz) | * $\delta_{\text{C}}$ (ppm) | COSY | HMBC              |
|----------|-----------------------------------------------|-----------------------------|------|-------------------|
| 2        | 4.67 d (9.5)                                  | 74.3                        | 3    | 3, 1', 6'         |
| 3        | 3.74 m                                        | 72.8                        | 2,4  |                   |
| 4        | 3.23 dd (15.3, 6.0)<br>2.71 dd (15.3, 10.6)   | 28.4                        | 3    | 2,3,5, 9,10       |
| 5        |                                               | 157.4                       |      |                   |
| 6        |                                               | 112.6                       |      |                   |
| 7        |                                               | 157.8                       |      |                   |
| 8        | 6.36 s                                        | 99.6                        |      | 6,7,9,10          |
| 9        |                                               | 153.1                       |      |                   |
| 10       |                                               | 106.8                       |      |                   |
| 5-OMe    | 3.73 s                                        | 61.1                        |      | 5                 |
| 6-Me     | 2.09 s                                        | 9.4                         |      | 5,6,7             |
| 7-OMe    | 3.80 s                                        | 56.7                        |      | 7                 |
| 1'       |                                               | 114.2                       |      |                   |
| 2'       | 6.84 s                                        | 102.4                       |      | 2, 1', 3', 4'     |
| 3'       |                                               | 134.4                       |      |                   |
| 4'       |                                               | 147.7                       |      |                   |
| 5'       |                                               |                             |      |                   |
| 6'       |                                               | 128.7                       |      |                   |
| 7'       | 4.96 d (15.4)<br>4.81 d (15.4)                | 65.7                        |      | 3, 1', 4', 5', 6' |
| 8'       |                                               |                             |      |                   |
| 3' OMe   | 3.95 s                                        | 57.1                        |      | 3'                |
| 4' OMe   | 3.91 s                                        | 62.2                        |      | 4'                |

\*assignments supported by HSQC and HMBC experiments



**Table S8.** Downregulation of LPS and IFN-  $\gamma$  induced nitric oxide production and cell viability of sequential extracts

| Sequential Extracts | Inhibition of NO production ( $\mu\text{g/mL}$ ),<br>N=6 | Cell viability ( $\mu\text{g/mL}$ ), N=6 |
|---------------------|----------------------------------------------------------|------------------------------------------|
| Hexane              | 39.11 $\pm$ 6.82                                         | >100                                     |
| DCM                 | 14.09 $\pm$ 0.81                                         | 30.65 $\pm$ 2.43                         |
| EtOAc               | 18.25 $\pm$ 7.60                                         | >100                                     |
| Ethanol             | 69.25 $\pm$ 13.33                                        | >100                                     |
| MeOH                | 49.93 $\pm$ 8.76                                         | >100                                     |
| Water               | 80.25 $\pm$ 17.18                                        | >100                                     |
